# Supplementary material for: A Classification of Basic Helix-Loop-Helix Transcription Factors of Soybean
Source: Hindawi journal article supplement (doi:10.1155/2015/603182), 2015-01-01
Supplement: f1 [file 603182.f1.zip]

**Additional File 3. Multiple sequence alignment for 319 soybean bHLH domains**

10 20 30 40 50  
GmbHLH1 KATKHFAT EKKRRREQLNCKYKILRNLPSP---TKI--D-RASVVGDAIDYIELIRTVNE  
GmbHLH2 KATKHFAT EKKRRREQLNCKYKILRNLPSP---TKT--D-RASVVGDAIDYIELIRTVNE  
GmbHLH3 KQFTSTT EKKRRRVDLSDTFALKELINP---SKS---RASVVGDAINYIELKRTVVEE  
GmbHLH4 ---MAS- EKKRRRESLEDTLQQLRDVNSS---ALN---KASIVDASKYIELKQKQVEG  
GmbHLH5 ---MAA- EKKRRASLEDTLQQLRDVNST---ALN---KASIVDASKYIELKQKQVEG  
GmbHLH6 ---MDSR--RKKKAAAMQRKLQQLRSVNSS---AVN---KASIVDASYIELKQKQVGD  
GmbHLH7 ---MVS R--EKKRATLNEKLQLLRSIINSSN---ALD---KTSIIVDASKYIELKEKVER  
GmbHLH8 QRMTHIAVERNNRRKKOMNEYLAVALRSLMPPS---YVQRGD-QASIIGGAINFVKELQLLQC  
GmbHLH9 QRMTHIAVERNNRRKKOMNEYLAVALRSLMPPS---YVQRGD-QASIIGGAINFVKELQLLQC  
GmbHLH10 QRMTHIAVERNNRRKKOMNEYLAVALRSLMPPS---YVQRGD-QASIIGGAINFVKELQLLQC  
GmbHLH11 QRRTHIAVERNNRRKKOMNEYLAVALRSLMPPS---YVQRGD-QASIIGGAINFVKELQLLQS  
GmbHLH12 QRMTHIAVERNNRRKKOMNEYLAVALRSLMPPS---YVQRGD-QASIIGGAINFVKELQLLQS  
GmbHLH13 QRMTHIAVERNNRRKKOMNEHLRVLRSMLPGS---YVQRGD-QASIIGGAEFVRELQLLQC  
GmbHLH14 QRMTHIAVERNNRRKKOMNEHLRVLRSMLPGS---YVQRGD-QASIIGGAEFVRELQLLQC  
GmbHLH15 QRMTHIAVERNNRRKKOMNEHLRVLRSMLPGS---YVQRGD-QASIIGGAEFVRELQLLQS  
GmbHLH16 QRMTHIAVERNNRRKKOMNEHLRVLRSMLPGS---YVQRGD-QASIIGGAEFVRELQLLQS  
GmbHLH17 QRMTHIAVERNNRRKKOMNEHLRVLRSMLPES---YVQRGD-QASIIGGAEFVRELQRLQF  
GmbHLH18 QRMTHIAVERNNRRKKOMNEHLRVLRSMLPES---YVQRGD-QASIIGGAEFVRELQRLQF  
GmbHLH19 QRMTHIAVERNNRRKKOMNEHLRVLRSMLPDS---YVQRGD-QASIIGGAEFVRELQRMHF  
GmbHLH20 QRMTHIAVERNNRRKKOMNEHLRVLRSMLPDS---YVQRGD-QASIIGGAEFVRELQRLHF  
GmbHLH21 QRI THIAVERNNRRKKOMNEHLRVLRSMLPES---YVQRGD-QASIIGGAEFVRELHLQLS  
GmbHLH22 QRI THIAVERNNRRKKOMNEHLRVLRSMLPES---YVQRGD-QASIIGGAEFVRELHLQLS  
GmbHLH23 ---MSHIAVERNNRRKKOMNEHLKVLRSLTPCF---YIKRGD-QASIIGGVIEFIELHQVLQA  
GmbHLH24 ---MSHIAVERNNRRKKOMNEHLKVLRSLTPCF---YIKRGD-QASIIGGVIEFIELHQVQRA  
GmbHLH25 -KVSHI- EVERNRRKKOMNEHLRVLRSMLPFF---YVQRGD-QASIIGGVVDYIELNQLLQC  
GmbHLH26 QKVSHI- EVERNRRKKOMNEHLRVLRSMLPFF---YVQRGD-QASIIGGVVDYIELNQLLQC  
GmbHLH27 QKMSHI- EVERNRRKKOMNEHLRVLRSMLPFF---YVQRGD-QASIIGGVVDYIELNQLLQA  
GmbHLH28 QKMSHI- EVERNRRKKOMNEHLRVLRSMLPFF---YVQRGD-QASIIGGVVDYIELNQLLQA  
GmbHLH29 FSKSNLE ERRRREKLSLRLMLRSLLVP-----IITMNM-KATIVEDAITYIELTQNI VQS  
GmbHLH30 FSKSNLE ERRRREKLSLRLMLRSLLVP-----IITMNM-KATIVEDAITYIELTQNI VQS  
GmbHLH31 FSKSNLE ERRRREKLSLRLMLRSLLVP-----IITMNM-KATIVEDAITYIELTQNI IEK  
GmbHLH32 YKSNLE ERRRREKLSLRLMLRSLLVP-----IITMNM-KATIVEDAITYIELKLDQKVQS  
GmbHLH33 YKSNLE ERRRREKLSLRLMLRSLLVP-----IITMNM-KATIVEDAITYIELKLDQKVQN  
GmbHLH34 YKSNLE ERRRREKLSLRLMLRSLLVP-----IITMNM-KATIVEDAITYIELKLDQKVQR  
GmbHLH35 QPSKNLMAE ERRRKKLNDRSLMLRAIIVP-----KISKMD-RTSILGDTIDYMKELLEKINN  
GmbHLH36 QPSKNLMAE ERRRKKLNDRSLMLRAIIVP-----KISKMD-RTSILGDTIDYMKELLEKINN  
GmbHLH37 QPSKNLMAE ERRRKKLNDRSLMLRAIIVP-----KISKMD-RTSILGDTIDYMKELLEKINN  
GmbHLH38 QPSKNLMAE ERRRKKLNDRSLMLRAIIVP-----KISKMD-RTSILGDTIDYMKELLEKINN  
GmbHLH39 QPSKNLMAE ERRRKKLNDRSLMLRAIIVP-----KISKMD-RTSILGDTIDYMKELLEKINN  
GmbHLH40 QPSKNLMAE ERRRKKLNDRSLMLRAIIVP-----KISKMD-RTSILGDTIDYMKELLEKINN  
GmbHLH41 QPSKNLMAE ERRRKKLNDRSLMLRAIIVP-----KISKMD-RTSILGDTIDYMKELLEKINN  
GmbHLH42 LPAKNLMAE ERRRKKLNDRSLMLRSVVP-----KISKMD-RASILGDAIDYIELLQRLIND  
GmbHLH43 LPAKNLMAE ERRRKKLNDRSLMLRSVVP-----KISKMD-RASILGDAIDYIELLQRLIND  
GmbHLH44 MPAKNLMAE ERRRKKLNDRSLMLRSVVP-----KISKMD-RASILGDAIDYIELLQRLIND  
GmbHLH45 MPAKNLMAE ERRRKKLNDRSLMLRSVVP-----KISKMD-RASILGDAIDYIELLQRLIND  
GmbHLH46 LPAKNLMAE ERRRKKLNDRSLMLRSVVP-----KISKMD-RASILGDAIDYIELLQRLISE  
GmbHLH47 MPAKNLMAE ERRRKKLNDRSLMLRSVVP-----KISKMD-RASILGDAIDYIELLQRLITD  
GmbHLH48 NQSKNLVAE ERRRKKLNDRSLMLRSVVP-----KISKMD-RASILGDAIDYIELLQRLQVKE  
GmbHLH49 NQSKNLVAE ERRRKKLNDRSLMLRSVVP-----KISKMD-RASILGDAIDYIELLQRLQVKE  
GmbHLH50 VASKNIVS ERRRKKLNDRSLMLRAVVP-----NITKMD-KASIKDAIDYIELHLHEQEK  
GmbHLH51 VASKNIVS ERRRKKLNDRSLMLRAVVP-----NITKMD-KASIKDAIDYIELHLHEQEK  
GmbHLH52 AASKNIVS ERRRKKLNDRSLMLRAVVP-----NITKMD-KASIKDAIDYIELHLHEQEK  
GmbHLH53 AASKNIVS ERRRKKLNDRSLMLRAVVP-----NITKMD-KASIKDAIDYIELHLHEQEK  
GmbHLH54 YQAKNLVT EERNRKNKIKGLFLRLSLVP-----RITKMD-RAAILADAVDHIKELQMOVRE  
GmbHLH55 YQAKNLVT EERNRKNKIKGLFLRLSLVP-----RITKMD-RAAILADAVDHIKELQMOVRE  
GmbHLH56 DRSKTL EERRRRGRMKELLYALRSVLP-----NITKMD-KASIIGDVAVYHDLQARAK  
GmbHLH57 DMS KTL EERRRRGRMKELLYALRSVLP-----NITKMD-KASIIGDVAVYHDLQARAK  
GmbHLH58 DRSKTL EERRRRGRMKELLYALRSVLP-----NITKMD-KASIIGDVAVYHDLQARAK  
GmbHLH59 DRSKTL EERRRRGRMKELLYALRSVLP-----NITKMD-KASIIGDVAVYHDLQARAK  
GmbHLH60 YETNHVMAE ERRRREKLNERFLRLRSMPV-----FMMRMD-KESILGDTIHYIELQLREKIES  
GmbHLH61 YETSHVMAE ERRRREKLNERFLRLRSMPV-----FMMRMD-KESILGDTIHYIELQLREKIES  
GmbHLH62 LSAHHVLA ERRRREKLNERFLRLRSVLP-----FVTKMD-KASILGDTIHYIELQLRRKIQE  
GmbHLH63 NGMNHVMS ERRRRAKLNERFLRLRSMPV-----SISKMD-KVSLDDDAIYIELKLRRIINE  
GmbHLH64 NGMNHVMS ERRRRAKLNERFLRLRSMPV-----SISKMD-KVSLDDDAIYIELKLRRIINE  
GmbHLH65 EPLNHVEAE ERRRREKLNORFYALRAVVP-----NISKMD-KASLLGDAIYIELNQLQAKLT  
GmbHLH66 EPLNHVEAE ERRRREKLNORFYALRAVVP-----NISKMD-KASLLGDAIYIELNQLQAKLT  
GmbHLH67 EPLNHVEAE ERRRREKLNORFYALRAVVP-----NISKMD-KASLLGDAIYIELNQLQAKVRI  
GmbHLH68 EPLNHVEAE ERRRREKLNORFYALRAVVP-----NISKMD-KASLLGDAIYIELNQLQAKLT  
GmbHLH69 EPLNHVEAE ERRRREKLNORFYALRAVVP-----NISKMD-KASLLGDAIYIELNQLQAKLT  
GmbHLH70 EPLNHVEAE ERRRREKLNORFYALRAVVP-----NISKMD-KASLLGDAIYIELNQLQAKLT  
GmbHLH71 EPLNHVEAE ERRRREKLNORFYALRAVVP-----NISKMD-KASLLGDAIYIELNQLQAKLT  
GmbHLH72 EPLNHVEAE ERRRREKLNORFYALRAVVP-----NISKMD-KASLLGDAIYIELNQLQAKLT  
GmbHLH73 EPLNHVEAE ERRRREKLNORFYALRAVVP-----NISKMD-KASLLGDAIYIELNQLQAKLT  
GmbHLH74 TPLNHVEAE ERRRREKLNORFYALRAVVP-----NISKMD-KASLLGDAIYIELNQLQAKLT  
GmbHLH75 TPLNHVEAE ERRRREKLNORFYALRAVVP-----NISKMD-KASLLGDAIYIELNQLQAKLT  
GmbHLH76 LPMNHVEAE ERRRREKLNORFYALRAVVP-----NISKMD-KASLLGDAIYIELNQLQAKLT  
GmbHLH77 RKTQKADRE KLRDRDLNEHFLRLSLVP-----RPN-KND-KATILGDTIQLLQDLTSQVSK  
GmbHLH78 RKTQKADRE KLRDRDLNEHFLRLSLVP-----RPN-KND-KATILGDTIQLLQDLTSQVSK  
GmbHLH79 RKTQKADRE KLRDRDLNEHFLRLSLVP-----RPN-KND-KATILGDTIQLLQDLTSQVSK  
GmbHLH80 RKLVLKADRE KLRDRDLNEHFLRLSLVP-----RPN-KND-KATILGDTIQLLQDLTSQVSK  
GmbHLH81 SSSDKACRE KMRDRDLNDRFELWSILVPG---PMLKMD-KAVILSDAVRVVSQLREAEQK  
GmbHLH82 SSSDKACRE KMRDRDLNDRFELWSILVPG---PMLKMD-KAVILSDAVRVVSQLREAEQK  
GmbHLH83 ASSSKACRE KLRDRDLNDRFELWSILVPG---RPPKTD-KAAILIDAAARMVTQLRDLAEQK  
GmbHLH84 ASSSKACRE KLRDRDLNDRFELWSILVPG---RPPKTD-KAAILIDAAARMVTQLRDLAEQK  
GmbHLH85 ASSSKACRE KLRDRDLNDRFELWSILVPG---RPPKTD-KAAILIDAAARMVTQLRDLAEQK  
GmbHLH86 ASSSKACRE KLRDRDLNDRFELWSILVPG---RPPKTD-KAAILIDAAARMVTQLRDLAEQK  
GmbHLH87 ASSSKACRE KLRDRDLNDRFELWSILVPG---RPPKTD-KAAILIDAAARMVTQLRDLAEQK  
GmbHLH88 ASSSKACRE KLRDRDLNDRFELWSILVPG---RPPKTD-KAAILIDAAARMVTQLRDLAEQK  
GmbHLH89 ASSSKACRE KLRDRDLNDRFELWSILVPG---RPPKTD-KAAILIDAAARMVTQLRDLAEQK  
GmbHLH90 QVSSKACRE KLRDRDLNDRFELWSILVPG---RPPKTD-KAAILIDAAARMVTQLRDLAEQK  
GmbHLH91 QYQQHT EERRRREKLNORFYALRAVVP-----TK--KN-KATILTTAT EYIELTQNI IEK  
GmbHLH92 HQHQQHMI EERRRREKLNORFYALRAVVP-----TK--KA-KGTLTTAKDTMRLMD IEK  
GmbHLH93 TQLHHMI EERRRREKLNORFYALRAVVP-----TK--KD-KASILIAAKELTSLMAE VDK  
GmbHLH94 TQLHHMI EERRRREKLNORFYALRAVVP-----TK--KD-KASILIAAKELTSLMAE VDK  
GmbHLH95 RSFRHMI EERRRREKLNORFYALRAVVP-----TK--KD-KASILIAAKELTSLMAE VDK  
GmbHLH96 ETLVHMI EERRRREKLNORFYALRAVVP-----LKKID-KATILSEAITHYKRLKERVRE  
GmbHLH97 ETLVHMI EERRRREKLNORFYALRAVVP-----LKKID-KATILSEAITHYKRLKERVRE  
GmbHLH98 ETLVHMI EERRRREKLNORFYALRAVVP-----LKKID-KATILSEAITHYKRLKERVRE  
GmbHLH99 ETLVHMI E
