# Supplementary material for: A Classification of Basic Helix-Loop-Helix Transcription Factors of Soybean
Source: Hindawi journal article supplement (doi:10.1155/2015/603182), 2015-01-01
Supplement: f1 [file 603182.f1.zip]

Additional File 8. New bHLH motif (Motif 40).

A: Sequence logo representation of consensus motif

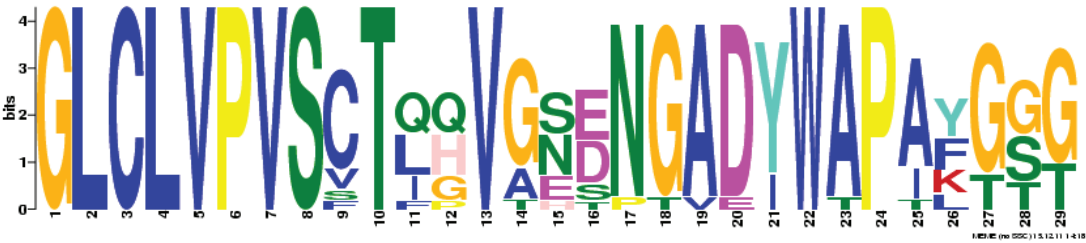

B. MEME alignment of sequences used to discover motif

| Name                                            | Start | p-value  | Sites                                                                                                                                         |
|-------------------------------------------------|-------|----------|-----------------------------------------------------------------------------------------------------------------------------------------------|
| Glyma08g21770.2:(Glyma08g21770.2 PACid:16272011 | 287   | 5.24e-38 | KDKPSDLKSR GLCLV <b>F</b> V <b>S</b> CT <b>Q</b> H <b>V</b> GN <b>E</b> NGAD <b>Y</b> WAP <b>A</b> Y <b>G</b> S <b>G</b> F                    |
| Glyma08g21770.1:(Glyma08g21770.1 PACid:16272010 | 289   | 5.24e-38 | KDKPSDLKSR GLCLV <b>F</b> V <b>S</b> CT <b>Q</b> H <b>V</b> GN <b>E</b> NGAD <b>Y</b> WAP <b>A</b> Y <b>G</b> S <b>G</b> F                    |
| Glyma07g02120.3:(Glyma07g02120.3 PACid:16265869 | 289   | 5.24e-38 | KDKPRDLKSR GLCLV <b>F</b> V <b>S</b> CT <b>Q</b> H <b>V</b> GN <b>E</b> NGAD <b>Y</b> WAP <b>A</b> Y <b>G</b> S <b>G</b> F                    |
| Glyma07g02120.2:(Glyma07g02120.2 PACid:16265868 | 287   | 5.24e-38 | KDKPRDLKSR GLCLV <b>F</b> V <b>S</b> CT <b>Q</b> H <b>V</b> GN <b>E</b> NGAD <b>Y</b> WAP <b>A</b> Y <b>G</b> S <b>G</b> F                    |
| Glyma07g02120.1:(Glyma07g02120.1 PACid:16265867 | 289   | 5.24e-38 | KDKPRDLKSR GLCLV <b>F</b> V <b>S</b> CT <b>Q</b> H <b>V</b> GN <b>E</b> NGAD <b>Y</b> WAP <b>A</b> Y <b>G</b> S <b>G</b> F                    |
| Glyma08g04110.3:(Glyma08g04110.3 PACid:16269892 | 316   | 2.62e-36 | EEANKDLRSR GLCLV <b>F</b> V <b>S</b> CT <b>L</b> Q <b>V</b> GS <b>D</b> NGAD <b>Y</b> WAP <b>A</b> F <b>G</b> G <b>G</b> FR                   |
| Glyma08g04110.1:(Glyma08g04110.1 PACid:16269890 | 343   | 2.62e-36 | EEANKDLRSR GLCLV <b>F</b> V <b>S</b> CT <b>L</b> Q <b>V</b> GS <b>D</b> NGAD <b>Y</b> WAP <b>A</b> F <b>G</b> G <b>G</b> FR                   |
| Glyma05g35610.1:(Glyma05g35610.1 PACid:16260811 | 325   | 2.62e-36 | EEPKKDLRSR GLCLV <b>F</b> V <b>S</b> CT <b>L</b> Q <b>V</b> GS <b>D</b> NGAD <b>Y</b> WAP <b>A</b> F <b>G</b> G <b>G</b> FR                   |
| Glyma07g09180.3:(Glyma07g09180.3 PACid:16266721 | 220   | 2.57e-35 | EEPKKGLRSR GLCLV <b>F</b> V <b>S</b> CT <b>L</b> Q <b>V</b> GS <b>D</b> NGAD <b>Y</b> WAP <b>A</b> L <b>G</b> G <b>G</b> FR                   |
| Glyma07g09180.1:(Glyma07g09180.1 PACid:16266719 | 303   | 2.57e-35 | EEPKKGLRSR GLCLV <b>F</b> V <b>S</b> CT <b>L</b> Q <b>V</b> GS <b>D</b> NGAD <b>Y</b> WAP <b>A</b> L <b>G</b> G <b>G</b> FR                   |
| Glyma02g15520.3:(Glyma02g15520.3 PACid:16248175 | 124   | 5.33e-29 | GVEPCSLRSR GLCLV <b>F</b> V <b>S</b> VT <b>I</b> G <b>V</b> A <b>E</b> S <b>N</b> GAD <b>I</b> WAP <b>I</b> K <b>T</b> T <b>T</b> SPKFEKDVSQ  |
| Glyma02g15520.1:(Glyma02g15520.1 PACid:16248173 | 126   | 5.33e-29 | GVEPCSLRSR GLCLV <b>F</b> V <b>S</b> VT <b>I</b> G <b>V</b> A <b>E</b> S <b>N</b> GAD <b>I</b> WAP <b>I</b> K <b>T</b> T <b>T</b> SPKFEKDVSQ  |
| Glyma07g32980.1:(Glyma07g32980.1 PACid:16268553 | 126   | 5.83e-29 | GMEPCSLRSR GLCLV <b>F</b> V <b>S</b> FT <b>I</b> G <b>V</b> A <b>E</b> T <b>N</b> GAD <b>I</b> WAP <b>I</b> K <b>T</b> T <b>T</b> SPKFEKDVSQ  |
| Glyma06g40760.1:(Glyma06g40760.1 PACid:16264777 | 458   | 6.22e-24 | EGPKQDLRSR GLCLV <b>F</b> V <b>S</b> ST <b>F</b> V <b>T</b> H <b>E</b> P <b>T</b> V <b>E</b> Y <b>W</b> T <b>P</b> T <b>F</b> G <b>G</b> T YR |
