# Supplementary material for: A Classification of Basic Helix-Loop-Helix Transcription Factors of Soybean
Source: Int J Genomics. 2015 Feb 11;2015:603182. doi: 10.1155/2015/603182 (PMC4339708; doi:10.1155/2015/603182)
Supplement: Supplementary file 1 — As Supplementary Material we have included the following. Addititional File 1: an Excel spreadsheet file that includes names and expression data for all of the soybean bHLH-encoding gene models. Additional File 2: A list of soybean gene models excluded from the analysis due to an incomplete bHLH domain or predicted in-frame stop codon. Additional File 3: A full-text alignment of all 319 soybean bHLH domains in pdf format. Additional File 4: a detailed phylogenetic tree of the soybean bHLH genes including full names and predicted family membership. Additional File 5: An Excel spreadsheet showing the presumptive rice and Arabidopsis orthologs of the soybean bHLH genes. Additional File 6: An Excel spreadsheet containing a list of bHLHs enriched for expression in seed or nodules. Additional File 7: The alignment of 319 soybean bHLH genes in PHYLIP format for computer analysis. Additional File 8: A LOGO illustration of the putative Motif 40. [file 603182.f1.zip › Supplementary Material/Additional File 1.xlsx]

## Sheet: MasterList
Additional File 1. Soybean bHLH genes -Table
				Expressed in:
	Locus (Glyma1.1)	Family	Intron type	leaf	flower	root	nodule	seed	pod	Motifs	DNA Binding	homeologs	Glyma2.0
GmbHLH11	Glyma04g10630	Ia	D			Y	Y	Y	Y	1,2,3	G	GmbHLH12,GmbHLH10	Glyma.04g098400
GmbHLH12	Glyma06g10470	Ia	D			Y	Y	Y	Y	1,2,3	G	GmbHLH10,GmbHLH11	Glyma.06g100000
GmbHLH13	Glyma02g14290	Ia	D	Y					Y	1,2,3	G	GmbHLH14	Glyma.02g129100
GmbHLH14	Glyma01g23230	Ia	D	Y					Y	1,2,3	G	GmbHLH13	Glyma.01g093400
GmbHLH15	Glyma16g02020	Ia	D	Y	Y			Y	Y	1,2	G	GmbHLH16	Glyma.16g017700
GmbHLH16	Glyma07g05500	Ia	D	Y	Y	Y		Y	Y	1,2,3	G	GmbHLH15	Glyma.07g049100
GmbHLH17	Glyma19g42520	Ia	D	Y	Y	Y	Y	Y	Y	1,2,3	G	GmbHLH20,GmbHLH19,GmbHLH18	Glyma.19g236900
GmbHLH18	Glyma03g39990	Ia	D	Y	Y	Y	Y	Y	Y	1,2,3	G	GmbHLH20,GmbHLH19,GmbHLH17	Glyma.03g240000
GmbHLH19	Glyma20g37550	Ia	D	Y	Y	Y	Y	Y	Y	2,3	G	GmbHLH20,GmbHLH18,GmbHLH17	Glyma.20g231800
GmbHLH20	Glyma10g29760	Ia	D			Y	Y	Y	Y	2,3	G	GmbHLH19,GmbHLH18,GmbHLH17	Glyma.10g156600
GmbHLH21	Glyma06g35330	Ia	D	Y	Y			Y	Y	1,2,3	G	GmbHLH22	Glyma.01g095500
GmbHLH22	Glyma08g36590	Ia	D	Y	Y			Y	Y	1,2,3	G	GmbHLH21	Glyma.08g271000
GmbHLH23	Glyma15g11130	Ia	D	Y	Y	Y		Y	Y	1	G	GmbHLH24	Glyma.15g104600
GmbHLH24	Glyma13g27880	Ia	D	Y		Y		Y	Y	1,2	G	GmbHLH23	Glyma.13g208300
GmbHLH27	Glyma04g41710	Ia	D	Y	Y			Y	Y	1	G	GmbHLH28	Glyma.04g238400
GmbHLH28	Glyma06g13080	Ia	D	Y	Y			Y	Y	1	G	GmbHLH27	not found
GmbHLH9	Glyma02g37310	Ia	D	Y	Y	Y	Y	Y	Y	1,2,3	G		not found
GmbHLH10	Glyma14g35560	Ia	D			Y	Y	Y		1,2,3	G	GmbHLH12,GmbHLH11	Glyma.14g178000
GmbHLH26	Glyma13g08740	Ia	D	Y	Y			Y		1,2	G		Glyma.13g040100
GmbHLH25	Glyma14g31390	Ia	D							1,2	G		not found
GmbHLH319	Glyma02g11500	Ib(1)	D					Y			G		Glyma.02g103200
GmbHLH301	Glyma04g35380	Ib(2)	I		Y			Y	Y		E	GmbHLH302	Glyma.04g182600
GmbHLH302	Glyma06g19490	Ib(2)	D		Y			Y	Y		E	GmbHLH301	Glyma.U035800
GmbHLH303	Glyma17g09810	Ib(2)	D	Y				Y	Y		E	GmbHLH304	Glyma.17g090500
GmbHLH307	Glyma15g08140	Ib(2)	D	Y	Y				Y		E		Glyma.15g075000
GmbHLH308	Glyma12g12880	Ib(2)	D						Y		E		Glyma.12g114300
GmbHLH309	Glyma06g44660	Ib(2)	D						Y		E		Glyma.06g291900
GmbHLH304	Glyma05g02110	Ib(2)	D		Y		Y	Y			E	GmbHLH303	Glyma.05g036800
GmbHLH300	Glyma03g28630	Ib(2)	other			Y	Y				G		Glyma.03g130600
GmbHLH311	Glyma20g29120	Ib(2)	D			Y	Y				G	GmbHLH312	Glyma.20g152900
GmbHLH314	Glyma09g27630	Ib(2)	D			Y	Y				G	GmbHLH313	Glyma.09g150000
GmbHLH298	Glyma19g31350	Ib(2)	other			Y					G		not found
GmbHLH299	Glyma03g28610	Ib(2)	other			Y					G		not found
GmbHLH312	Glyma10g38630	Ib(2)	D			Y					G	GmbHLH311	Glyma.10g241400
GmbHLH313	Glyma16g32620	Ib(2)	D			Y					G	GmbHLH314	Glyma.16g201400
GmbHLH315	Glyma16g32610	Ib(2)	D			Y					G		Glyma.16g201300
GmbHLH316	Glyma09g27610	Ib(2)	D			Y					G		Glyma.09g149900
GmbHLH317	Glyma10g38620	Ib(2)	D			Y					G		Glyma.10g241300
GmbHLH318	Glyma20g29130	Ib(2)	D			Y					E		Glyma.20g153000
GmbHLH305	Glyma13g24730	Ib(2)	D								E		Glyma.13g178800
GmbHLH306	Glyma07g31710	Ib(2)	D								E		Glyma.07g197300
GmbHLH310	Glyma12g33260	Ib(2)	D								E		Glyma.12g205200
GmbHLH2	Glyma08g09420	II	D					Y	Y		G	GmbHLH1	not found
GmbHLH3	Glyma16g12110	II	D	Y					Y		E		not found
GmbHLH1	Glyma05g26490	II	D								G	GmbHLH2	Glyma.05g134400
GmbHLH50	Glyma17g06610	IIIa/c	D	Y	Y	Y	Y	Y	Y		E		Glyma.17g058600
GmbHLH51	Glyma13g00480	IIIa/c	D	Y	Y	Y	Y	Y	Y		E		Glyma.13g101100
GmbHLH52	Glyma15g18070	IIIa/c	D	Y	Y	Y	Y	Y	Y	13,15	E	GmbHLH53	Glyma.15g166800
GmbHLH53	Glyma09g06770	IIIa/c	D	Y	Y	Y	Y	Y	Y	13	E	GmbHLH52	Glyma.09g060200
GmbHLH56	Glyma13g39650	IIIa/c	D			Y	Y				E	GmbHLH57	Glyma.13g322100
GmbHLH57	Glyma12g30240	IIIa/c	D			Y					E	GmbHLH56	Glyma.12g178500
GmbHLH59	Glyma11g19850	IIIa/c	D			Y					E		Glyma.11g192800
GmbHLH58	Glyma12g08640	IIIa/c	D								E		Glyma.12g081200
GmbHLH48	Glyma20g24170	IIIb	I								E	GmbHLH49	Glyma.20g107500
GmbHLH49	Glyma10g42830	IIIb	I							4	E	GmbHLH48	Glyma.10g281800
GmbHLH55	Glyma08g39470	IIIb	D	Y	Y			Y	Y		E	GmbHLH54	Glyma.08g286500
GmbHLH54	Glyma18g19110	IIIb	D								E	GmbHLH55	not found
GmbHLH38	Glyma02g38240	IIIb	D		Y	Y	Y	Y	Y	6	E	GmbHLH37	Glyma.02g217800
GmbHLH39	Glyma01g02390	IIIb	D	Y	Y	Y	Y	Y	Y	4,6	E	GmbHLH41,GmbHLH40	Glyma.01g019700
GmbHLH40	Glyma08g37240	IIIb	D	Y	Y	Y		Y	Y	4,6	E	GmbHLH39,GmbHLH41	Glyma.08g274200
GmbHLH41	Glyma09g33590	IIIb	D	Y	Y	Y	Y	Y	Y	4,6	E	GmbHLH39,GmbHLH40	Glyma.09g203000
GmbHLH42	Glyma19g27480	IIIb	D	Y	Y	Y	Y	Y	Y	4,5,6	E		not found
GmbHLH43	Glyma16g05390	IIIb	D	Y	Y	Y	Y	Y	Y	4,5,6	E		Glyma.16g049400
GmbHLH44	Glyma04g37750	IIIb	D	Y	Y			Y	Y	4,5,6	E	GmbHLH45	Glyma.04g200500
GmbHLH45	Glyma06g17330	IIIb	D	Y	Y	Y		Y	Y	4,5,6	E	GmbHLH44	Glyma.06g165000
GmbHLH46	Glyma05g38530	IIIb	D	Y	Y				Y	4,5,6	E		Glyma.05g200900
GmbHLH47	Glyma16g26290	IIIb	D	Y	Y	Y	Y	Y	Y	4,5,6	E		not found
GmbHLH36	Glyma06g09670	IIIb	D			Y	Y	Y		6	E	GmbHLH35	Glyma.06g092000
GmbHLH37	Glyma14g36370	IIIb	D			Y	Y	Y		6	E	GmbHLH38	Glyma.14g185100
GmbHLH35	Glyma04g09580	IIIb	D			Y	Y			6	E	GmbHLH36	Glyma.04g090100
GmbHLH65	Glyma16g02690	IIId/e	I	Y	Y	Y	Y	Y	Y	7	G	GmbHLH66	Glyma.16g023900
GmbHLH66	Glyma07g06090	IIId/e	I	Y	Y	Y	Y	Y	Y	7	G	GmbHLH65	Glyma.07g055200
GmbHLH67	Glyma19g44570	IIId/e	I	Y	Y	Y	Y	Y	Y	7	G		Glyma.19g256700
GmbHLH68	Glyma01g02250	IIId/e	I	Y	Y	Y	Y	Y	Y		G		not found
GmbHLH69	Glyma09g33730	IIId/e	I	Y	Y	Y	Y	Y	Y	7	G	GmbHLH71,GmbHLH70	Glyma.09g204500
GmbHLH70	Glyma01g12740	IIId/e	I	Y	Y	Y	Y	Y	Y	7	G	GmbHLH71,GmbHLH69	Glyma.01g096600
GmbHLH71	Glyma08g36720	IIId/e	I	Y	Y	Y	Y	Y	Y	7	G	GmbHLH69,GmbHLH70	Glyma.08g271900
GmbHLH72	Glyma13g18130	IIId/e	I	Y	Y	Y	Y	Y	Y		G		not found
GmbHLH73	Glyma10g03950	IIId/e	I	Y	Y	Y	Y	Y	Y	7	G		Glyma.10g034300
GmbHLH74	Glyma16g02320	IIId/e	I		Y	Y	Y	Y	Y		G	GmbHLH75	Glyma.16g020500
GmbHLH75	Glyma07g05740	IIId/e	I	Y	Y	Y	Y	Y	Y		G	GmbHLH74	Glyma.07g051500
GmbHLH76	Glyma02g09670	IIId/e	I				Y	Y	Y		G		not found
GmbHLH32	Glyma13g32370	IIIf	D			Y	Y	Y			E	GmbHLH33	Glyma.13g250300
GmbHLH33	Glyma15g06950	IIIf	D					Y			E	GmbHLH32	Glyma.15g063900
GmbHLH29	Glyma11g16730	IIIf	D								E		not found
GmbHLH30	Glyma07g30730	IIIf	D								E		not found
GmbHLH31	Glyma14g13500	IIIf	C								E		not found
GmbHLH34	Glyma15g06960	IIIf	D								E		Glyma.15g064000
GmbHLH4	Glyma18g44280	IIIf	F				Y		Y		H	GmbHLH5	Glyma.18g210700
GmbHLH6	Glyma03g04970	IIIf	F	Y		Y	Y	Y			N	GmbHLH7	Glyma.03g040500
GmbHLH7	Glyma01g32130	IIIf	F	Y	Y	Y	Y	Y			H	GmbHLH6	Glyma.01g129700
GmbHLH8	Glyma18g02560	IIIf	F					Y			H		Glyma.18g022200
GmbHLH5	Glyma09g41470	IIIf	F				Y				H	GmbHLH4	Glyma.09g278100
GmbHLH62	Glyma02g16670	Iva	I		Y			Y	Y	8	G		Glyma.02g147800
GmbHLH63	Glyma05g37770	Iva	D		Y	Y	Y		Y	8	G	GmbHLH64	Glyma.05g208300
GmbHLH64	Glyma08g01810	Iva	D	Y	Y	Y			Y	8	G	GmbHLH63	Glyma.08g014900
GmbHLH61	Glyma03g30940	Iva	I			Y	Y			8	G	GmbHLH60	Glyma.03g152800
GmbHLH60	Glyma19g33770	Iva	I							8	G	GmbHLH61	Glyma.19g155300
GmbHLH100	Glyma13g44570	Iva	D	Y	Y			Y	Y		G	GmbHLH101	Glyma.13g368500
GmbHLH101	Glyma15g00750	Iva	D		Y			Y	Y		G	GmbHLH100	Glyma.15g005100
GmbHLH102	Glyma07g03060	Iva	D	Y	Y	Y	Y	Y	Y		G	GmbHLH103	Glyma.07g027200
GmbHLH103	Glyma08g23050	Iva	D	Y	Y	Y	Y	Y	Y		G	GmbHLH102	Glyma.08g215500
GmbHLH104	Glyma15g00730	Iva	D	Y	Y	Y	Y	Y	Y		G		Glyma.15g005000
GmbHLH105	Glyma07g03100	Iva	D	Y	Y	Y	Y	Y	Y		N		Glyma.07g027400
GmbHLH106	Glyma08g23020	Iva	D	Y	Y	Y	Y	Y	Y		N		Glyma.08g215300
GmbHLH107	Glyma17g16730	Iva	D			Y		Y	Y		G	GmbHLH108	Glyma.17g156000
GmbHLH109	Glyma01g40610	Iva	D	Y				Y	Y		G		not found
GmbHLH110	Glyma17g16740	Iva	D			Y	Y		Y		G		not found
GmbHLH112	Glyma11g04690	Iva	D			Y	Y		Y		G	GmbHLH113	Glyma.11g043700
GmbHLH113	Glyma01g40600	Iva	D			Y	Y		Y		G	GmbHLH112	Glyma.01g197900
GmbHLH117	Glyma17g16720	Iva	D		Y	Y	Y		Y		G	GmbHLH118	Glyma.17g155900
GmbHLH118	Glyma05g23530	Iva	D	Y	Y	Y	Y	Y	Y		G	GmbHLH117	Glyma.05g110900
GmbHLH119	Glyma11g04680	Iva	D	Y	Y			Y	Y		G		not found
GmbHLH120	Glyma01g40620	Iva	D	Y	Y			Y	Y		G		Glyma.01g198100
GmbHLH121	Glyma03g25280	Iva	D		Y			Y	Y		G		Glyma.03g105700
GmbHLH122	Glyma07g13410	Iva	D	Y	Y			Y	Y		G		not found
GmbHLH123	Glyma07g13420	Iva	D					Y	Y		G		not found
GmbHLH96	Glyma08g23060	Iva	D	Y	Y	Y			Y		G	GmbHLH97	not found
GmbHLH97	Glyma07g03050	Iva	D	Y	Y				Y		G	GmbHLH96	not found
GmbHLH98	Glyma03g25100	Iva	D	Y	Y			Y	Y		G		Glyma.03g105000
GmbHLH99	Glyma07g13500	Iva	D	Y	Y			Y	Y		G		not found
GmbHLH108	Glyma05g23330	Iva	D		Y	Y		Y			G	GmbHLH107	Glyma.05g110700
GmbHLH114	Glyma13g32650	Iva	D			Y	Y	Y			G	GmbHLH115,GmbHLH116	Glyma.13g253500
GmbHLH115	Glyma15g06680	Iva	D			Y	Y				G	GmbHLH114,GmbHLH116	Glyma.15g061400
GmbHLH111	Glyma05g23290	Iva	D			Y					G		not found
GmbHLH116	Glyma07g30420	Iva	D								G	GmbHLH114,GmbHLH115	Glyma.07g185300
GmbHLH77	Glyma08g15740	Ivb	F	Y	Y	Y	Y	Y	Y	9	G	GmbHLH79	Glyma.08g148500
GmbHLH78	Glyma12g02740	Ivb	F	Y	Y	Y	Y	Y	Y	9	G		Glyma.12g024400
GmbHLH79	Glyma15g29630	Ivb	F	Y	Y	Y	Y	Y	Y	9	G	GmbHLH77	Glyma.15g215100
GmbHLH80	Glyma07g26910	Ivb	F	Y	Y	Y	Y	Y	Y	9	G		Glyma.07g171600
GmbHLH81	Glyma13g32470	Ivc	H	Y	Y				Y	9	G		Glyma.13g251300
GmbHLH82	Glyma15g06860	Ivc	H	Y	Y				Y	9	G		Glyma.15g063000
GmbHLH83	Glyma13g36260	Ivc	H	Y	Y	Y	Y	Y	Y	9,16	G	GmbHLH86,GmbHLH84,GmbHLH85	Glyma.13g286700
GmbHLH84	Glyma12g34300	Ivc	H	Y	Y	Y	Y	Y	Y	9	G	GmbHLH86,GmbHLH83,GmbHLH85	Glyma.12g214900
GmbHLH85	Glyma12g16560	Ivc	H	Y	Y	Y	Y	Y	Y	9,16	G	GmbHLH86,GmbHLH83,GmbHLH84	Glyma.12g136300
GmbHLH86	Glyma06g41620	Ivc	H	Y	Y	Y	Y	Y	Y	9,16	G	GmbHLH83,GmbHLH84,GmbHLH85	Glyma.06g266800
GmbHLH87	Glyma13g38140	Ivc	H		Y	Y	Y	Y	Y	9	G		Glyma.13g305500
GmbHLH88	Glyma12g32280	Ivc	H		Y	Y	Y	Y	Y		G		Glyma.12g196700
GmbHLH89	Glyma20g22010	Ivc	H	Y	Y	Y	Y	Y	Y	9	G	GmbHLH90	Glyma.20g088600
GmbHLH90	Glyma10g01010	Ivc	H	Y	Y	Y	Y	Y	Y	9	G	GmbHLH89	Glyma.10g007300
GmbHLH95	Glyma02g00290	Ivd	D						Y		G		Glyma.02g000800
GmbHLH93	Glyma15g18580	Ivd	D			Y					G		Glyma.15g170500
GmbHLH91	Glyma17g06190	Ivd	D								G		Glyma.17g054000
GmbHLH92	Glyma13g16480	Ivd	D								G		Glyma.13g105400
GmbHLH94	Glyma09g07390	Ivd	D								G		not found
GmbHLH240	Glyma19g32600	IX	A		Y	Y	Y	Y	Y		E	GmbHLH241	Glyma.19g144200
GmbHLH241	Glyma03g29750	IX	A		Y	Y	Y		Y		E	GmbHLH240	Glyma.03g141700
GmbHLH244	Glyma13g41670	IX	A	Y	Y	Y	Y	Y	Y		E	GmbHLH245,GmbHLH246,GmbHLH247	Glyma.13g341700
GmbHLH245	Glyma15g03740	IX	A	Y	Y	Y	Y	Y	Y		E	GmbHLH244,GmbHLH246,GmbHLH247	Glyma.15g032700
GmbHLH246	Glyma11g13960	IX	A	Y	Y	Y	Y	Y	Y		E	GmbHLH244,GmbHLH245,GmbHLH247	Glyma.11g131200
GmbHLH247	Glyma12g05930	IX	A	Y	Y	Y	Y		Y		E	GmbHLH244,GmbHLH245,GmbHLH246	Glyma.12g055400
GmbHLH248	Glyma08g26110	IX	A	Y	Y	Y	Y	Y	Y		E		Glyma.08g239500
GmbHLH250	Glyma08g16190	IX	A	Y	Y	Y	Y	Y	Y		E		Glyma.08g152500
GmbHLH253	Glyma20g39220	IX	C	Y	Y	Y	Y	Y	Y		E		Glyma.20g248100
GmbHLH242	Glyma02g29830	IX	A	Y		Y		Y			E	GmbHLH243	Glyma.02g175700
GmbHLH251	Glyma13g27460	IX	A	Y		Y	Y				E		not found
GmbHLH252	Glyma12g36750	IX	A			Y	Y				E		Glyma.12g238700
GmbHLH243	Glyma10g12150	IX	A			Y					E	GmbHLH242	Glyma.10g093100
GmbHLH249	Glyma15g42680	IX	A	Y	Y	Y					E		Glyma.15g271900
GmbHLH144	Glyma18g51080	Va	G	Y	Y	Y	Y	Y	Y	10,11	H	GmbHLH145	Glyma.18g275400
GmbHLH145	Glyma08g28010	Va	G	Y	Y	Y	Y	Y	Y	10,11	G	GmbHLH144	Glyma.08g252800
GmbHLH146	Glyma17g08980	Va	G	Y	Y	Y	Y	Y	Y	10,11	G	GmbHLH147	Glyma.17g082100
GmbHLH147	Glyma05g07490	Va	G	Y	Y	Y	Y	Y	Y	10,11	G	GmbHLH146	Glyma.05g017800
GmbHLH148	Glyma02g13670	Va	G	Y	Y	Y	Y	Y	Y	10,11	G	GmbHLH149	Glyma.02g123400
GmbHLH149	Glyma01g09010	Va	G	Y	Y	Y	Y	Y	Y	10,11	G	GmbHLH148	Glyma.01g066600
GmbHLH126	Glyma19g30910	Vb	D	Y	Y	Y		Y	Y	12,13	G	GmbHLH127	Glyma.19g128900
GmbHLH127	Glyma03g28150	Vb	D	Y	Y	Y		Y	Y	12,13	G	GmbHLH126	Glyma.03g126100
GmbHLH128	Glyma02g23590	Vb	D	Y					Y	12,13	G		Glyma.06g221200
GmbHLH129	Glyma20g32660	Vb	D	Y	Y	Y		Y	Y	12,13	G	GmbHLH130,GmbHLH131,GmbHLH132	Glyma.20g185500
GmbHLH130	Glyma10g34910	Vb	D	Y	Y	Y		Y	Y	12,13	G	GmbHLH129,GmbHLH131,GmbHLH132	Glyma.10g205000
GmbHLH131	Glyma01g22530	Vb	D	Y		Y	Y	Y	Y	12,13	G	GmbHLH130,GmbHLH129,GmbHLH132	Glyma.01g088300
GmbHLH133	Glyma02g15780	Vb	D	Y	Y	Y	Y	Y	Y	12,13	G	GmbHLH134	Glyma.02g139700
GmbHLH135	Glyma12g14400	Vb	D	Y	Y				Y	12,13	G	GmbHLH136	Glyma.12g122800
GmbHLH137	Glyma13g36740	Vb	D		Y	Y	Y	Y	Y	12,13	G		not found
GmbHLH138	Glyma18g02940	Vb	D	Y	Y	Y			Y	12,13	G	GmbHLH141,GmbHLH140,GmbHLH139	Glyma.18g025800
GmbHLH139	Glyma11g35480	Vb	D		Y	Y			Y	12,13	G	GmbHLH141,GmbHLH140,GmbHLH138	Glyma.11g231300
GmbHLH142	Glyma14g36010	Vb	C					Y	Y	12,13	G	GmbHLH143	Glyma.14g181500
GmbHLH143	Glyma02g37720	Vb	D	Y	Y			Y	Y	12,13	G	GmbHLH142	Glyma.02g213800
GmbHLH134	Glyma07g32690	Vb	D		Y	Y	Y	Y		12,13	G	GmbHLH133	Glyma.07g205800
GmbHLH136	Glyma06g43560	Vb	D			Y	Y	Y		12,13	G	GmbHLH135	Glyma.06g283300
GmbHLH140	Glyma14g06330	Vb	D	Y	Y	Y				12,13	G	GmbHLH141,GmbHLH139,GmbHLH138	Glyma.14g058200
GmbHLH141	Glyma02g42570	Vb	D		Y	Y				12,13	G	GmbHLH140,GmbHLH139,GmbHLH138	Glyma.02g258300
GmbHLH132	Glyma02g11190	Vb	D	Y						12,13	G	GmbHLH130,GmbHLH129,GmbHLH131	Glyma.02g100700
GmbHLH124	Glyma02g04650	Vb	D							12,13	G	GmbHLH125	Glyma.02g041000
GmbHLH125	Glyma01g02930	Vb	D							12,13	G	GmbHLH124	not found
GmbHLH220	Glyma19g41260	VIIa/b	A	Y	Y	Y		Y	Y	14	G		not found
GmbHLH222	Glyma20g22280	VIIa/b	A	Y	Y	Y	Y	Y	Y		G		not found
GmbHLH223	Glyma10g28290	VIIa/b	A	Y	Y	Y		Y	Y	14	G		Glyma.10g142600
GmbHLH224	Glyma10g04890	VIIa/b	A	Y	Y	Y	Y	Y	Y	14,15,16	G	GmbHLH225,GmbHLH226	Glyma.10g042800
GmbHLH225	Glyma13g19250	VIIa/b	A	Y	Y			Y	Y	14,15,16	G	GmbHLH224,GmbHLH226	Glyma.13g130100
GmbHLH226	Glyma03g32740	VIIa/b	A	Y	Y	Y	Y	Y	Y	14,15,16	G	GmbHLH224,GmbHLH225	not found
GmbHLH227	Glyma11g05810	VIIa/b	A	Y	Y	Y	Y	Y	Y		G		Glyma.11g054600
GmbHLH228	Glyma01g39450	VIIa/b	A	Y	Y			Y	Y		G		not found
GmbHLH229	Glyma17g35950	VIIa/b	A	Y	Y		Y	Y	Y		G	GmbHLH230	not found
GmbHLH230	Glyma14g09230	VIIa/b	A	Y	Y			Y	Y		G	GmbHLH229	not found
GmbHLH231	Glyma17g19500	VIIa/b	A	Y	Y			Y	Y		G		not found
GmbHLH232	Glyma18g14530	VIIa/b	A	Y	Y			Y	Y	14,15,16	G	GmbHLH233	Glyma.18g115700
GmbHLH233	Glyma08g41620	VIIa/b	A	Y	Y			Y	Y	14,15,16	G	GmbHLH232	Glyma.08g303900
GmbHLH236	Glyma19g40980	VIIa/b	A	Y	Y	Y	Y		Y	14	G		Glyma.19g222000
GmbHLH237	Glyma03g38390	VIIa/b	A	Y	Y				Y		G		not found
GmbHLH239	Glyma10g27910	VIIa/b	A	Y	Y				Y		G		Glyma.10g138800
GmbHLH238	Glyma02g00980	VIIa/b	A					Y			G		not found
GmbHLH234	Glyma14g03600	VIIa/b	A		Y					16	G	GmbHLH235	Glyma.14g032200
GmbHLH235	Glyma02g45150	VIIa/b	A		Y					14,16	G	GmbHLH234	Glyma.02g282100
GmbHLH221	Glyma03g38670	VIIa/b	A							14	G		not found
GmbHLH216	Glyma01g32890	VIIa/b	B	Y	Y			Y	Y		G		Glyma.01g133500
GmbHLH217	Glyma03g04000	VIIa/b	B	Y	Y	Y			Y		G		Glyma.03g034000
GmbHLH218	Glyma11g17120	VIIa/b	B	Y	Y				Y	14	G	GmbHLH219	Glyma.U014700
GmbHLH219	Glyma01g15930	VIIa/b	B	Y	Y				Y	14	G	GmbHLH218	Glyma.01g076900
GmbHLH215	Glyma12g32310	VIIIa	I				Y				H		not found
GmbHLH213	Glyma15g41400	VIIIa	I								N		Glyma.15g260500
GmbHLH214	Glyma08g17730	VIIIa	I								N		not found
GmbHLH210	Glyma15g02530	VIIIa	I		Y					17	H	GmbHLH211,GmbHLH209,GmbHLH212	not found
GmbHLH209	Glyma13g42900	VIIIa	I	Y						17	H	GmbHLH211,GmbHLH210,GmbHLH212	Glyma.13g352600
GmbHLH211	Glyma07g01610	VIIIa	I							17	N	GmbHLH210,GmbHLH209,GmbHLH212	not found
GmbHLH212	Glyma08g21130	VIIIa	I							17	N	GmbHLH211,GmbHLH210,GmbHLH209	Glyma.08g197600
GmbHLH197	Glyma03g06800	VIIIb	I	Y	Y	Y			Y		H	GmbHLH196,GmbHLH198	not found
GmbHLH205	Glyma05g32410	VIIIb	I		Y			Y	Y	17	N	GmbHLH206,GmbHLH207,GmbHLH208	Glyma.05g190600
GmbHLH206	Glyma08g16570	VIIIb	I					Y	Y	17	N	GmbHLH205,GmbHLH207,GmbHLH208	Glyma.08g156000
GmbHLH207	Glyma04g39210	VIIIb	I		Y			Y	Y	17	N	GmbHLH205,GmbHLH206,GmbHLH208	Glyma.04g214100
GmbHLH208	Glyma06g15730	VIIIb	I					Y	Y	17	N	GmbHLH205,GmbHLH206,GmbHLH207	Glyma.06g152300
GmbHLH200	Glyma11g05920	VIIIb	I		Y			Y		17	N	GmbHLH201	Glyma.11g055300
GmbHLH203	Glyma04g04190	VIIIb	I					Y		17	N		Glyma.04g039500
GmbHLH204	Glyma06g04380	VIIIb	I		Y			Y		17	N		Glyma.06g040800
GmbHLH196	Glyma07g18650	VIIIb	I		Y	Y					H	GmbHLH197,GmbHLH198	not found
GmbHLH202	Glyma05g19920	VIIIb	I	Y						17	N	GmbHLH199	Glyma.05g094900
GmbHLH195	Glyma0732s00200	VIIIb	I								H		Glyma.18g204700
GmbHLH198	Glyma01g30660	VIIIb	I								H	GmbHLH197,GmbHLH196	Glyma.01g123000
GmbHLH199	Glyma17g19830	VIIIb	I							17	N	GmbHLH202	Glyma.17g173100
GmbHLH201	Glyma01g39360	VIIIb	I							17	N	GmbHLH200	Glyma.01g186700
GmbHLH190	Glyma20g26990	VIIIc	A				Y	Y	Y		H		not found
GmbHLH191	Glyma18g04420	VIIIc	A			Y				18	H	GmbHLH192,GmbHLH193,GmbHLH194	Glyma.18g039200
GmbHLH194	Glyma14g07590	VIIIc	A			Y				18	H	GmbHLH192,GmbHLH191,GmbHLH193	Glyma.14g069700
GmbHLH185	Glyma20g26980	VIIIc	A							19	H	GmbHLH186	Glyma.20g133600
GmbHLH186	Glyma10g40360	VIIIc	A							19	H	GmbHLH185	Glyma.10g257500
GmbHLH187	Glyma17g35420	VIIIc	A							19	H	GmbHLH188	not found
GmbHLH188	Glyma14g09770	VIIIc	A							19	H	GmbHLH187	not found
GmbHLH189	Glyma04g04800	VIIIc	A							19	H		not found
GmbHLH192	Glyma11g33840	VIIIc	A							18	H	GmbHLH191,GmbHLH193,GmbHLH194	Glyma.11g217700
GmbHLH193	Glyma02g41370	VIIIc	A							18	H	GmbHLH192,GmbHLH191,GmbHLH194	Glyma.02g246400
GmbHLH181	Glyma20g32520	X	A			Y	Y			20,40	H	GmbHLH182	Glyma.20g184300
GmbHLH182	Glyma10g35040	X	A			Y	Y			20,40	H	GmbHLH181	Glyma.10g206300
GmbHLH166	Glyma10g40710	X	B		Y	Y		Y	Y	20,22,40	N	GmbHLH165	Glyma.10g261100
GmbHLH167	Glyma15g07010	X	A	Y	Y	Y			Y	20,22,40	H	GmbHLH168	Glyma.15g064500
GmbHLH168	Glyma13g32320	X	A	Y	Y	Y			Y	20,22,40	H	GmbHLH167	Glyma.13g249800
GmbHLH169	Glyma13g36010	X	A	Y	Y	Y	Y	Y	Y	20,22,40	H	GmbHLH170,GmbHLH172,GmbHLH171	Glyma.13g284400
GmbHLH170	Glyma12g34490	X	A	Y	Y	Y	Y	Y	Y	20,22,40	H	GmbHLH169,GmbHLH172,GmbHLH171	Glyma.12g216800
GmbHLH171	Glyma12g17630	X	A	Y	Y	Y		Y	Y	22,40	H	GmbHLH170,GmbHLH169,GmbHLH172	Glyma.12g141700
GmbHLH172	Glyma06g40760	X	A	Y	Y	Y	Y	Y	Y	22,40	H	GmbHLH170,GmbHLH169,GmbHLH171	Glyma.06g260000
GmbHLH173	Glyma07g02120	X	A	Y	Y	Y	Y	Y	Y	20,22,40	H	GmbHLH174,GmbHLH175,GmbHLH177,GmbHLH176,GmbHLH178	Glyma.07g018500
GmbHLH174	Glyma08g21770	X	A	Y	Y	Y	Y	Y	Y	20,22,40	H	GmbHLH173,GmbHLH175,GmbHLH177,GmbHLH176,GmbHLH178	Glyma.08g203600
GmbHLH175	Glyma15g02020	X	A	Y	Y	Y		Y	Y	20,22,40	H	GmbHLH173,GmbHLH174,GmbHLH177,GmbHLH176,GmbHLH178	Glyma.15g017300
GmbHLH176	Glyma05g35610	X	A	Y	Y	Y	Y	Y	Y	20,22,40	H	GmbHLH173,GmbHLH174,GmbHLH175,GmbHLH177,GmbHLH178	Glyma.05g229500
GmbHLH177	Glyma08g04110	X	B	Y	Y	Y	Y	Y	Y	20,22,40	H	GmbHLH173,GmbHLH174,GmbHLH175,GmbHLH176,GmbHLH178	Glyma.08g036900
GmbHLH178	Glyma07g09180	X	A	Y	Y	Y	Y	Y	Y	20,22,40	H	GmbHLH173,GmbHLH174,GmbHLH175,GmbHLH177,GmbHLH176	Glyma.07g083500
GmbHLH183	Glyma02g15520	X	B	Y	Y	Y	Y	Y	Y	20,22,40	H	GmbHLH184	Glyma.02g137400
GmbHLH184	Glyma07g32980	X	A	Y	Y	Y	Y	Y	Y	20,22,40	H	GmbHLH183	Glyma.07g208000
GmbHLH165	Glyma20g26630	X	B	Y				Y		20,22,40	N	GmbHLH166	Glyma.20g130200
GmbHLH179	Glyma16g24660	X	A			Y	Y	Y		22,40	N	GmbHLH180	not found
GmbHLH180	Glyma02g05970	X	B			Y		Y		22, 40	N	GmbHLH179	not found
GmbHLH254	Glyma19g34360	XI	A	Y	Y	Y	Y	Y	Y	21,22	G	GmbHLH255,GmbHLH257,GmbHLH256	Glyma.19g160900
GmbHLH255	Glyma03g31510	XI	A	Y	Y	Y	Y	Y	Y	21,22	G	GmbHLH254,GmbHLH257,GmbHLH256	Glyma.03g158500
GmbHLH256	Glyma10g03690	XI	A	Y	Y	Y	Y	Y	Y	21,22	G	GmbHLH255,GmbHLH254,GmbHLH257	Glyma.10g031600
GmbHLH257	Glyma02g16110	XI	A	Y	Y	Y	Y	Y	Y	21,22	G	GmbHLH255,GmbHLH254,GmbHLH256	Glyma.02g142800
GmbHLH258	Glyma20g36770	XI	A	Y	Y	Y	Y	Y	Y	21,22	G	GmbHLH259	Glyma.20g224700
GmbHLH259	Glyma10g30430	XI	A	Y	Y	Y	Y	Y	Y	21,22	G	GmbHLH258	Glyma.10g162300
GmbHLH260	Glyma15g33020	XI	A	Y	Y	Y	Y	Y	Y	21,22,23	G	GmbHLH261	Glyma.15g203900
GmbHLH261	Glyma09g14380	XI	A	Y	Y	Y	Y	Y	Y	21,22,23	G	GmbHLH260	Glyma.09g098300
GmbHLH262	Glyma17g08300	XI	A	Y	Y	Y	Y	Y	Y	21,22,23	G		Glyma.17g075200
GmbHLH267	Glyma07g10310	XII	A		Y	Y			Y	23	G		not found
GmbHLH270	Glyma0041s00210	XII	A	Y	Y	Y	Y	Y	Y	24	N		Glyma.U037800
GmbHLH271	Glyma14g10180	XII	A	Y	Y	Y	Y	Y	Y	23,24	G		Glyma.14g089600
GmbHLH272	Glyma04g05090	XII	A		Y	Y			Y	23	G		not found
GmbHLH273	Glyma19g32570	XII	A	Y	Y	Y	Y	Y	Y	23,24	G	GmbHLH274,GmbHLH275	Glyma.19g143900
GmbHLH274	Glyma03g29710	XII	A	Y	Y	Y	Y	Y	Y	23,24	G	GmbHLH273,GmbHLH275	Glyma.03g141200
GmbHLH275	Glyma10g12210	XII	A	Y	Y	Y	Y	Y	Y	23,24	G	GmbHLH274,GmbHLH273	Glyma.10g093600
GmbHLH276	Glyma08g01210	XII	A	Y			Y		Y	23	G	GmbHLH277,GmbHLH278,GmbHLH279	Glyma.08g009100
GmbHLH277	Glyma05g38450	XII	A	Y	Y		Y		Y	23	G	GmbHLH276,GmbHLH278,GmbHLH279	Glyma.05g201700
GmbHLH278	Glyma04g37690	XII	A	Y	Y		Y	Y	Y	23	G	GmbHLH277,GmbHLH276,GmbHLH279	Glyma.04g199900
GmbHLH279	Glyma06g17420	XII	A	Y	Y		Y	Y	Y	23	G	GmbHLH277,GmbHLH276,GmbHLH278	Glyma.06g165700
GmbHLH280	Glyma02g02930	XII	A	Y	Y	Y		Y	Y		G		not found
GmbHLH281	Glyma04g34660	XII	A	Y	Y	Y	Y	Y	Y	23	G	GmbHLH283	Glyma.04g176900
GmbHLH282	Glyma08g40540	XII	A	Y	Y	Y	Y	Y	Y		G		not found
GmbHLH283	Glyma06g20000	XII	A	Y	Y	Y	Y	Y	Y	23	G	GmbHLH281	Glyma.06g188100
GmbHLH284	Glyma17g10290	XII	A	Y	Y	Y	Y	Y	Y	23	G	GmbHLH287	Glyma.17g095000
GmbHLH285	Glyma01g04610	XII	A	Y	Y	Y		Y	Y	23	G		Glyma.01g039200
GmbHLH286	Glyma02g02940	XII	A	Y	Y	Y	Y	Y	Y		G		not found
GmbHLH287	Glyma05g01590	XII	A	Y	Y	Y	Y	Y	Y	23	G	GmbHLH284	Glyma.05g031800
GmbHLH288	Glyma12g04670	XII	E	Y	Y	Y	Y	Y	Y	23,24	G	GmbHLH289	Glyma.12g042800
GmbHLH289	Glyma11g12450	XII	E	Y	Y	Y	Y	Y	Y	23,24	G	GmbHLH288	Glyma.11g117100
GmbHLH291	Glyma06g01430	XII	E	Y	Y	Y	Y	Y	Y	23,24	G	GmbHLH290	Glyma.06g012200
GmbHLH292	Glyma02g13860	XII	A	Y	Y	Y	Y	Y	Y	23,24	G	GmbHLH293	Glyma.02g125200
GmbHLH293	Glyma01g09400	XII	A	Y	Y	Y	Y	Y	Y	23,24	G	GmbHLH292	Glyma.01g068600
GmbHLH294	Glyma03g21770	XII	A	Y	Y	Y	Y	Y	Y	23,24	G	GmbHLH296,GmbHLH295,GmbHLH297	Glyma.03g086800
GmbHLH295	Glyma18g32560	XII	A		Y	Y	Y	Y	Y	23,24	G	GmbHLH296,GmbHLH294,GmbHLH297	Glyma.18g156900
GmbHLH296	Glyma08g46040	XII	A	Y	Y	Y	Y	Y	Y	23,24	G	GmbHLH295,GmbHLH294,GmbHLH297	Glyma.08g346300
GmbHLH297	Glyma16g10620	XII	A	Y	Y	Y	Y	Y	Y	23,24	G	GmbHLH296,GmbHLH295,GmbHLH294	Glyma.16g087300
GmbHLH290	Glyma04g01400	XII	E	Y	Y	Y	Y			23,24	G	GmbHLH291	Glyma.04g012500
GmbHLH265	Glyma05g35060	XII	A		Y	Y				23	G		Glyma.05g234500
GmbHLH266	Glyma08g04660	XII	A			Y				23	G		not found
GmbHLH268	Glyma09g31580	XII	A		Y					23	G		Glyma.09g183500
GmbHLH269	Glyma06g05180	XII	A		Y					23	G		not found
GmbHLH263	Glyma17g34010	XII	A							23	G	GmbHLH264	Glyma.17g223100
GmbHLH264	Glyma14g11790	XII	A							23	E	GmbHLH263	not found
GmbHLH160	Glyma19g34620	XIII	D	Y	Y	Y	Y	Y	Y	25,26,27	N		not found
GmbHLH161	Glyma10g04090	XIII	D	Y	Y	Y	Y	Y	Y	25,26,27	N	GmbHLH162	Glyma.10g035400
GmbHLH162	Glyma03g31880	XIII	D	Y	Y	Y	Y	Y	Y	25,26,27	N	GmbHLH161	not found
GmbHLH163	Glyma20g35920	XIII	D			Y			Y	25,26,27	N		not found
GmbHLH164	Glyma10g31690	XIII	D		Y		Y	Y	Y	25,26,27	N		not found
GmbHLH150	Glyma18g49320	XV	D	Y	Y	Y			Y		H	GmbHLH151	Glyma.18g258700
GmbHLH151	Glyma09g37370	XV	D	Y		Y		Y	Y		H	GmbHLH150	Glyma.09g239100
GmbHLH152	Glyma19g02510	XV	D	Y	Y	Y		Y	Y		H	GmbHLH154,GmbHLH155,GmbHLH153	Glyma.19g021400
GmbHLH157	Glyma08g41000	XV	D	Y	Y				Y		H	GmbHLH156	Glyma.08g298700
GmbHLH158	Glyma01g05310	XV	D					Y	Y		H	GmbHLH159	Glyma.01g044800
GmbHLH159	Glyma02g02250	XV	D	Y	Y	Y		Y	Y		H	GmbHLH158	Glyma.02g018900
GmbHLH153	Glyma13g05280	XV	D		Y			Y			H	GmbHLH154,GmbHLH155,GmbHLH152	Glyma.13g063800
GmbHLH155	Glyma06g20400	Xv	D			Y		Y			H	GmbHLH154,GmbHLH153,GmbHLH152	not found
GmbHLH154	Glyma04g34080	XV	D			Y					H	GmbHLH155,GmbHLH153,GmbHLH152	Glyma.04g172500
GmbHLH156	Glyma18g15920	XV	D	Y							H	GmbHLH157	Glyma.18g123100
Key:
DNA binding; G = G-box binder, E= Ebox binder, H= HLH, no basic region (4 or less basic residues) N= potential DNA binding, not E-box binding.
Expression data: Leaf = leaf, seed 10DAF-42DAF
