# Supplementary material for: A Classification of Basic Helix-Loop-Helix Transcription Factors of Soybean
Source: Int J Genomics. 2015 Feb 11;2015:603182. doi: 10.1155/2015/603182 (PMC4339708; doi:10.1155/2015/603182)
Supplement: Supplementary file 1 — As Supplementary Material we have included the following. Addititional File 1: an Excel spreadsheet file that includes names and expression data for all of the soybean bHLH-encoding gene models. Additional File 2: A list of soybean gene models excluded from the analysis due to an incomplete bHLH domain or predicted in-frame stop codon. Additional File 3: A full-text alignment of all 319 soybean bHLH domains in pdf format. Additional File 4: a detailed phylogenetic tree of the soybean bHLH genes including full names and predicted family membership. Additional File 5: An Excel spreadsheet showing the presumptive rice and Arabidopsis orthologs of the soybean bHLH genes. Additional File 6: An Excel spreadsheet containing a list of bHLHs enriched for expression in seed or nodules. Additional File 7: The alignment of 319 soybean bHLH genes in PHYLIP format for computer analysis. Additional File 8: A LOGO illustration of the putative Motif 40. [file 603182.f1.zip › Supplementary Material/Additional File 2.xlsx]

## Sheet: Removed bHLHs
Supplemental Table 2. Omitted bHLHs
Locus	Arabidopsis homolog	Arabidopsis bHLH	Rice homolog	Rice bHLH	reason					Glyma2.0
Glyma04g34910	AT1G02090		LOC_Os07g30840		unusual intron/exon pattern, homologs in rice and Arabidopsis are not bHLHs					not found
Glyma06g20520	AT3G28857		LOC_Os10g26410							Glyma.06g192300
Glyma04g33920	AT5G15160	AtbHLH134	LOC_Os10g26460							Glyma.04g171600
Glyma13g37200	AT4G20970	AtbHLH162	LOC_Os02g13670		unusual intron/exon pattern, not expressed in soybean					not found
Glyma02g11490	AT1G49770	AtbHLH095	LOC_Os02g34320	OsbHLH146	no basic region					Glyma.02g103100
Glyma08g36320	AT2G31210	AtbHLH091	LOC_Os04g51070	OsbHLH141						not found
Glyma06g04880	AT2G14760	AtbHLH084	LOC_Os07g39940	OsbHLH128	in frame stop in what should be basic region					not found
Glyma02g10420	AT1G27660	AtbHLH110	LOC_Os07g28890	OsbHLH077	no basic region, not expressed in soybean					Glyma.02g094000
Glyma20g29140	AT5G51780	AtbHLH036	LOC_Os08g37730	OsbHLH047						not found
Glyma14g17900	AT5G65640	AtbHLH093	LOC_Os03g04310	OsbHLH003						not found
