# Supplementary material for: A Classification of Basic Helix-Loop-Helix Transcription Factors of Soybean
Source: Int J Genomics. 2015 Feb 11;2015:603182. doi: 10.1155/2015/603182 (PMC4339708; doi:10.1155/2015/603182)
Supplement: Supplementary file 1 — As Supplementary Material we have included the following. Addititional File 1: an Excel spreadsheet file that includes names and expression data for all of the soybean bHLH-encoding gene models. Additional File 2: A list of soybean gene models excluded from the analysis due to an incomplete bHLH domain or predicted in-frame stop codon. Additional File 3: A full-text alignment of all 319 soybean bHLH domains in pdf format. Additional File 4: a detailed phylogenetic tree of the soybean bHLH genes including full names and predicted family membership. Additional File 5: An Excel spreadsheet showing the presumptive rice and Arabidopsis orthologs of the soybean bHLH genes. Additional File 6: An Excel spreadsheet containing a list of bHLHs enriched for expression in seed or nodules. Additional File 7: The alignment of 319 soybean bHLH genes in PHYLIP format for computer analysis. Additional File 8: A LOGO illustration of the putative Motif 40. [file 603182.f1.zip › Supplementary Material/Additional File 5.xlsx]

## Sheet: Homologs
Supplemental Table 5. Arabidopsis and Rice homologs of soybean bHLHs
	Soybean locus ID Glyma1.1	A. thaliana gene	Reciprocal top hit?	AtbHLH#	At annotation		e value	% identity	O. sativa gene	Reciprocal top hit?	e value	% identity	OsbHLH	rice annotation
GmbHLH1	Glyma05g26490	AT2G31210	r	AtbHLH091	Symbols:	basic helix-loop-helix (bHLH) DNA-binding superfamily	2e-61	40	LOC_Os04g51070	r	8e-45	37	OsbHLH141	AtbHLH091-like/
GmbHLH10	Glyma14g35560	AT1G72210	r	AtbHLH096	Symbols:	basic helix-loop-helix (bHLH) DNA-binding superfamily	5e-72	49	LOC_Os03g08930		1e-65	46	OsbHLH044	AtbHLH096-like/
GmbHLH100	Glyma13g44570	AT4G37850		AtbHLH025	Symbols:	basic helix-loop-helix (bHLH) DNA-binding superfamily	4e-40	47	LOC_Os03g51580		2e-40	48	OsbHLH018	AtbHLH018-like/
GmbHLH101	Glyma15g00750	AT4G37850		AtbHLH025	Symbols:	basic helix-loop-helix (bHLH) DNA-binding superfamily	5e-37	45	LOC_Os03g51580		7e-41	48	OsbHLH018	AtbHLH018-like/
GmbHLH102	Glyma07g03060	AT4G37850		AtbHLH025	Symbols:	basic helix-loop-helix (bHLH) DNA-binding superfamily	8e-37	42	LOC_Os03g51580		2e-39	43	OsbHLH018	AtbHLH018-like/
GmbHLH103	Glyma08g23050	AT4G37850		AtbHLH025	Symbols:	basic helix-loop-helix (bHLH) DNA-binding superfamily	8e-35	46	LOC_Os03g51580		3e-33	41	OsbHLH018	AtbHLH018-like/
GmbHLH104	Glyma15g00730	AT4G37850		AtbHLH025	Symbols:	basic helix-loop-helix (bHLH) DNA-binding superfamily	8e-33	49	LOC_Os03g51580		1e-36	45	OsbHLH018	AtbHLH018-like/
GmbHLH105	Glyma07g03100	AT4G37850		AtbHLH025	Symbols:	basic helix-loop-helix (bHLH) DNA-binding superfamily	2e-18	34	LOC_Os03g51580		1e-18	31	OsbHLH018	AtbHLH018-like/
GmbHLH106	Glyma08g23020	AT2G22760		AtbHLH019	Symbols:	basic helix-loop-helix (bHLH) DNA-binding superfamily	1e-24	36	LOC_Os03g51580		3e-26	37	OsbHLH018	AtbHLH018-like/
GmbHLH107	Glyma17g16730	AT4G37850		AtbHLH025	Symbols:	basic helix-loop-helix (bHLH) DNA-binding superfamily	3e-45	48	LOC_Os03g51580		4e-42	48	OsbHLH018	AtbHLH018-like/
GmbHLH108	Glyma05g23330	AT4G37850		AtbHLH025	Symbols:	basic helix-loop-helix (bHLH) DNA-binding superfamily	8e-46	49	LOC_Os03g51580		3e-40	47	OsbHLH018	AtbHLH018-like/
GmbHLH109	Glyma01g40610	AT4G37850		AtbHLH025	Symbols:	basic helix-loop-helix (bHLH) DNA-binding superfamily	1e-34	45	LOC_Os03g51580		1e-35	42	OsbHLH018	AtbHLH018-like/
GmbHLH11	Glyma04g10630	AT1G72210		AtbHLH096	Symbols:	basic helix-loop-helix (bHLH) DNA-binding superfamily	2e-65	45	LOC_Os03g08930		7e-59	42	OsbHLH044	AtbHLH096-like/
GmbHLH110	Glyma17g16740	AT4G37850		AtbHLH025	Symbols:	basic helix-loop-helix (bHLH) DNA-binding superfamily	6e-44	47	LOC_Os03g51580		9e-44	49	OsbHLH018	AtbHLH018-like/
GmbHLH111	Glyma05g23290	AT4G37850		AtbHLH025	Symbols:	basic helix-loop-helix (bHLH) DNA-binding superfamily	7e-39	48	LOC_Os03g51580		2e-37	50	OsbHLH018	AtbHLH018-like/
GmbHLH112	Glyma11g04690	AT4G37850	r	AtbHLH025	Symbols:	basic helix-loop-helix (bHLH) DNA-binding superfamily	4e-49	56	LOC_Os03g51580		3e-44	50	OsbHLH018	AtbHLH018-like/
GmbHLH113	Glyma01g40600	AT4G37850		AtbHLH025	Symbols:	basic helix-loop-helix (bHLH) DNA-binding superfamily	3e-47	40	LOC_Os03g51580		3e-42	48	OsbHLH018	AtbHLH018-like/
GmbHLH114	Glyma13g32650	AT4G37850		AtbHLH025	Symbols:	basic helix-loop-helix (bHLH) DNA-binding superfamily	3e-50	58	LOC_Os03g51580		6e-47	54	OsbHLH018	AtbHLH018-like/
GmbHLH115	Glyma15g06680	AT4G37850		AtbHLH025	Symbols:	basic helix-loop-helix (bHLH) DNA-binding superfamily	2e-49	57	LOC_Os03g51580		2e-48	55	OsbHLH018	AtbHLH018-like/
GmbHLH116	Glyma07g30420	AT4G37850		AtbHLH025	Symbols:	basic helix-loop-helix (bHLH) DNA-binding superfamily	7e-43	58	LOC_Os03g51580		4e-43	55	OsbHLH018	AtbHLH018-like/
GmbHLH117	Glyma17g16720	AT4G37850		AtbHLH025	Symbols:	basic helix-loop-helix (bHLH) DNA-binding superfamily	2e-44	49	LOC_Os03g51580	r	3e-47	51	OsbHLH018	AtbHLH018-like/
GmbHLH118	Glyma05g23530	AT4G37850		AtbHLH025	Symbols:	basic helix-loop-helix (bHLH) DNA-binding superfamily	5e-42	48	LOC_Os03g51580		1e-39	46	OsbHLH018	AtbHLH018-like/
GmbHLH119	Glyma11g04680	AT4G37850		AtbHLH025	Symbols:	basic helix-loop-helix (bHLH) DNA-binding superfamily	2e-35	46	LOC_Os03g51580		1e-35	46	OsbHLH018	AtbHLH018-like/
GmbHLH12	Glyma06g10470	AT1G72210		AtbHLH096	Symbols:	basic helix-loop-helix (bHLH) DNA-binding superfamily	4e-65	44	LOC_Os03g08930		5e-60	41	OsbHLH044	AtbHLH096-like/
GmbHLH120	Glyma01g40620	AT4G37850		AtbHLH025	Symbols:	basic helix-loop-helix (bHLH) DNA-binding superfamily	9e-38	48	LOC_Os03g51580		2e-39	48	OsbHLH018	AtbHLH018-like/
GmbHLH121	Glyma03g25280	AT4G37850		AtbHLH025	Symbols:	basic helix-loop-helix (bHLH) DNA-binding superfamily	3e-32	43	LOC_Os03g51580		4e-33	43	OsbHLH018	AtbHLH018-like/
GmbHLH122	Glyma07g13410	AT4G37850		AtbHLH025	Symbols:	basic helix-loop-helix (bHLH) DNA-binding superfamily	5e-34	41	LOC_Os03g51580		2e-29	44	OsbHLH018	AtbHLH018-like/
GmbHLH123	Glyma07g13420	AT4G37850		AtbHLH025	Symbols:	basic helix-loop-helix (bHLH) DNA-binding superfamily	3e-29	43	LOC_Os03g51580		3e-31	46	OsbHLH018	AtbHLH018-like/
GmbHLH124	Glyma02g04650	AT4G38070		AtbHLH131	Symbols:	basic helix-loop-helix (bHLH) DNA-binding superfamily	6e-25	41	LOC_Os08g33590		1e-12	38	OsbHLH038	AtbHLH030-like/
GmbHLH125	Glyma01g02930	AT4G38070		AtbHLH131	Symbols:	basic helix-loop-helix (bHLH) DNA-binding superfamily	4e-34	45	LOC_Os08g33590		5e-18	38	OsbHLH038	AtbHLH030-like/
GmbHLH126	Glyma19g30910	AT2G41130	r	AtbHLH106	Symbols:	basic helix-loop-helix (bHLH) DNA-binding superfamily	4e-56	65	LOC_Os03g15440		2e-36	55	OsbHLH040	AtbHLH030-like/
GmbHLH127	Glyma03g28150	AT2G41130		AtbHLH106	Symbols:	basic helix-loop-helix (bHLH) DNA-binding superfamily	5e-57	68	LOC_Os03g15440		6e-39	57	OsbHLH040	AtbHLH030-like/
GmbHLH128	Glyma02g23590	AT2G41130		AtbHLH106	Symbols:	basic helix-loop-helix (bHLH) DNA-binding superfamily	3e-52	67	LOC_Os03g15440		5e-34	54	OsbHLH040	AtbHLH030-like/
GmbHLH129	Glyma20g32660	AT1G68810		AtbHLH030	Symbols:	basic helix-loop-helix (bHLH) DNA-binding superfamily	2e-61	53	LOC_Os03g15440		3e-49	44	OsbHLH040	AtbHLH030-like/
GmbHLH13	Glyma02g14290	AT3G24140	r	AtbHLH097	Symbols: FMA	basic helix-loop-helix (bHLH) DNA-binding	e-108	55	LOC_Os05g50900		7e-45	45	OsbHLH051	AtbHLH097-like/
GmbHLH130	Glyma10g34910	AT1G68810		AtbHLH030	Symbols:	basic helix-loop-helix (bHLH) DNA-binding superfamily	1e-66	50	LOC_Os03g15440		1e-53	45	OsbHLH040	AtbHLH030-like/
GmbHLH131	Glyma01g22530	AT1G68810		AtbHLH030	Symbols:	basic helix-loop-helix (bHLH) DNA-binding superfamily	2e-68	56	LOC_Os03g15440	r	1e-51	47	OsbHLH040	AtbHLH030-like/
GmbHLH132	Glyma02g11190	AT1G68810		AtbHLH030	Symbols:	basic helix-loop-helix (bHLH) DNA-binding superfamily	5e-73	57	LOC_Os03g15440		2e-56	49	OsbHLH040	AtbHLH030-like/
GmbHLH133	Glyma02g15780	AT1G68810		AtbHLH030	Symbols:	basic helix-loop-helix (bHLH) DNA-binding superfamily	1e-32	43	LOC_Os01g11910	r	6e-31	46	OsbHLH037	0
GmbHLH134	Glyma07g32690	AT1G68810		AtbHLH030	Symbols:	basic helix-loop-helix (bHLH) DNA-binding superfamily	4e-31	40	LOC_Os01g11910		1e-30	42	OsbHLH037	0
GmbHLH135	Glyma12g14400	AT1G68810		AtbHLH030	Symbols:	basic helix-loop-helix (bHLH) DNA-binding superfamily	8e-28	43	LOC_Os03g15440		6e-26	38	OsbHLH040	AtbHLH030-like/
GmbHLH136	Glyma06g43560	AT1G68810		AtbHLH030	Symbols:	basic helix-loop-helix (bHLH) DNA-binding superfamily	8e-26	41	LOC_Os08g33590		2e-26	38	OsbHLH038	AtbHLH030-like/
GmbHLH137	Glyma13g36740	AT1G68810		AtbHLH030	Symbols:	basic helix-loop-helix (bHLH) DNA-binding superfamily	4e-25	37	LOC_Os03g15440		7e-24	35	OsbHLH040	AtbHLH030-like/
GmbHLH138	Glyma18g02940	AT2G40200		AtbHLH051	Symbols:	basic helix-loop-helix (bHLH) DNA-binding superfamily	1e-37	40	LOC_Os01g06640		4e-30	40	OsbHLH035	0
GmbHLH139	Glyma11g35480	AT2G40200		AtbHLH051	Symbols:	basic helix-loop-helix (bHLH) DNA-binding superfamily	8e-34	50	LOC_Os03g15440		9e-29	48	OsbHLH040	AtbHLH030-like/
GmbHLH14	Glyma01g23230	AT3G24140		AtbHLH097	Symbols: FMA	basic helix-loop-helix (bHLH) DNA-binding	e-105	53	LOC_Os05g50900	r	1e-43	44	OsbHLH051	AtbHLH097-like/
GmbHLH140	Glyma14g06330	AT2G40200		AtbHLH051	Symbols:	basic helix-loop-helix (bHLH) DNA-binding superfamily	1e-40	46	LOC_Os01g06640	r	9e-33	43	OsbHLH035	0
GmbHLH141	Glyma02g42570	AT2G40200		AtbHLH051	Symbols:	basic helix-loop-helix (bHLH) DNA-binding superfamily	1e-39	42	LOC_Os03g15440		1e-33	45	OsbHLH040	AtbHLH030-like/
GmbHLH142	Glyma14g36010	AT1G68810		AtbHLH030	Symbols:	basic helix-loop-helix (bHLH) DNA-binding superfamily	3e-24	42	LOC_Os09g28900		4e-23	46	OsbHLH043	0
GmbHLH143	Glyma02g37720	AT3G25710		AtbHLH032	Symbols: BHLH32, ATAIG1, TMO5	basic helix-loop-helix 32	3e-24	37	LOC_Os03g15440		7e-26	40	OsbHLH040	AtbHLH030-like/
GmbHLH144	Glyma18g51080	AT1G69010		AtbHLH102	Symbols: BIM2	BES1-interacting Myc-like protein 2	6e-42	40	LOC_Os08g38210		2e-34	37	OsbHLH031	AtbHLH102-like/
GmbHLH145	Glyma08g28010	AT1G69010		AtbHLH102	Symbols: BIM2	BES1-interacting Myc-like protein 2	4e-50	42	LOC_Os09g29930		6e-43	38	OsbHLH032	AtbHLH102-like/
GmbHLH146	Glyma17g08980	AT5G08130		AtbHLH046	Symbols: BIM1	basic helix-loop-helix (bHLH) DNA-binding	e-103	47	LOC_Os08g38210		3e-52	40	OsbHLH031	AtbHLH102-like/
GmbHLH147	Glyma05g07490	AT5G08130	r	AtbHLH046	Symbols: BIM1	basic helix-loop-helix (bHLH) DNA-binding	e-105	48	LOC_Os08g38210		8e-51	43	OsbHLH031	AtbHLH102-like/
GmbHLH148	Glyma02g13670	AT1G69010	r	AtbHLH102	Symbols: BIM2	BES1-interacting Myc-like protein 2	2e-91	54	LOC_Os08g38210	r	4e-53	43	OsbHLH031	AtbHLH102-like/
GmbHLH149	Glyma01g09010	AT1G69010		AtbHLH102	Symbols: BIM2	BES1-interacting Myc-like protein 2	6e-87	52	LOC_Os08g38210		2e-52	43	OsbHLH031	AtbHLH102-like/
GmbHLH15	Glyma16g02020	AT3G61950		AtbHLH067	Symbols:	basic helix-loop-helix (bHLH) DNA-binding superfamily	2e-44	33	LOC_Os02g52190		1e-29	40	OsbHLH048	AtbHLH096-like/
GmbHLH150	Glyma18g49320	AT3G28857		At164PRE5	Symbols:	basic helix-loop-helix (bHLH) DNA-binding family	5e-32	74	LOC_Os10g26460		2e-20	59	OsbHLH173	#N/A
GmbHLH151	Glyma09g37370	AT3G28857		At164PRE5	Symbols:	basic helix-loop-helix (bHLH) DNA-binding family	6e-32	74	LOC_Os10g26460		7e-21	60	OsbHLH173	#N/A
GmbHLH152	Glyma19g02510	AT3G28857		At164PRE5	Symbols:	basic helix-loop-helix (bHLH) DNA-binding family	5e-28	80	LOC_Os10g26460		3e-21	63	OsbHLH173	#N/A
GmbHLH153	Glyma13g05280	AT3G28857		At164PRE5	Symbols:	basic helix-loop-helix (bHLH) DNA-binding family	5e-28	80	LOC_Os10g26460		3e-21	63	OsbHLH173	#N/A
GmbHLH154	Glyma04g34080	AT1G74500	r	AtbHLH135	Symbols: ATBS1, TMO7, BS1	activation-tagged	4e-29	80	LOC_Os10g26460		7e-26	74	#N/A	#N/A
GmbHLH155	Glyma06g20400	AT1G74500		AtbHLH135	Symbols: ATBS1, TMO7, BS1	activation-tagged	1e-27	77	LOC_Os10g26460		3e-24	71	#N/A	#N/A
GmbHLH156	Glyma18g15920	AT1G26945		At163KDR	Symbols: KDR	basic helix-loop-helix (bHLH) DNA-binding	3e-29	82	LOC_Os10g26460		3e-23	62	OsbHLH173	#N/A
GmbHLH157	Glyma08g41000	AT1G26945		At163KDR	Symbols: KDR	basic helix-loop-helix (bHLH) DNA-binding	1e-30	85	LOC_Os10g26460		7e-25	66	OsbHLH173	#N/A
GmbHLH158	Glyma01g05310	AT1G26945		At163KDR	Symbols: KDR	basic helix-loop-helix (bHLH) DNA-binding	7e-31	86	LOC_Os10g26460	r	1e-25	70	OsbHLH173	#N/A
GmbHLH159	Glyma02g02250	AT1G26945		At163KDR	Symbols: KDR	basic helix-loop-helix (bHLH) DNA-binding	2e-31	87	LOC_Os10g26460		3e-25	68	OsbHLH173	#N/A
GmbHLH16	Glyma07g05500	AT3G61950	r	AtbHLH067	Symbols:	basic helix-loop-helix (bHLH) DNA-binding superfamily	1e-57	37	LOC_Os03g08930		1e-42	42	OsbHLH044	AtbHLH096-like/
GmbHLH160	Glyma19g34620	AT1G06150		AtbHLH167	Symbols: EMB1444	basic helix-loop-helix (bHLH) DNA-binding	1e-87	52	LOC_Os11g06010		6e-56	55	OsbHLH151	/putative phytochrome interacting factor
GmbHLH161	Glyma10g04090	AT1G06150		AtbHLH167	Symbols:	basic helix-loop-helix (bHLH) DNA-binding superfamily	e-126	39	LOC_Os01g64560		3e-52	53	OsbHLH149	0
GmbHLH162	Glyma03g31880	AT1G06150		AtbHLH167	Symbols: EMB1444	basic helix-loop-helix (bHLH) DNA-binding	e-101	36	LOC_Os01g64560		2e-51	56	OsbHLH149	0
GmbHLH163	Glyma20g35920	AT2G27230		AtbHLH156	Symbols: LHW	transcription factor-related	6e-52	54	LOC_Os02g45170		2e-64	61	#N/A	#N/A
GmbHLH164	Glyma10g31690	AT2G27230		AtbHLH156	Symbols: LHW	transcription factor-related	1e-51	52	LOC_Os02g45170		3e-66	62	#N/A	#N/A
GmbHLH165	Glyma20g26630	AT3G19500	r	AtbHLH113	Symbols:	basic helix-loop-helix (bHLH) DNA-binding superfamily	1e-40	44	LOC_Os03g55220	r	3e-32	46	OsbHLH066	/putative ethylene-responsive protein
GmbHLH166	Glyma10g40710	AT3G19500		AtbHLH113	Symbols:	basic helix-loop-helix (bHLH) DNA-binding superfamily	3e-39	40	LOC_Os03g55220		9e-30	44	OsbHLH066	/putative ethylene-responsive protein
GmbHLH167	Glyma15g07010	AT3G20640		AtbHLH123	Symbols:	basic helix-loop-helix (bHLH) DNA-binding superfamily	2e-48	40	LOC_Os05g42180		3e-47	68	OsbHLH067	AtbHLH112-like/
GmbHLH168	Glyma13g32320	AT1G61660		AtbHLH112	Symbols:	basic helix-loop-helix (bHLH) DNA-binding superfamily	1e-46	49	LOC_Os05g42180		1e-46	65	OsbHLH067	AtbHLH112-like/
GmbHLH169	Glyma13g36010	AT3G20640	r	AtbHLH123	Symbols:	basic helix-loop-helix (bHLH) DNA-binding superfamily	1e-69	45	LOC_Os05g42180		1e-47	66	OsbHLH067	AtbHLH112-like/
GmbHLH17	Glyma19g42520	AT1G72210		AtbHLH096	Symbols:	basic helix-loop-helix (bHLH) DNA-binding superfamily	2e-65	47	LOC_Os03g08930		9e-67	47	OsbHLH044	AtbHLH096-like/
GmbHLH170	Glyma12g34490	AT3G20640		AtbHLH123	Symbols:	basic helix-loop-helix (bHLH) DNA-binding superfamily	3e-68	45	LOC_Os05g42180		2e-47	66	OsbHLH067	AtbHLH112-like/
GmbHLH171	Glyma12g17630	AT3G20640		AtbHLH123	Symbols:	basic helix-loop-helix (bHLH) DNA-binding superfamily	4e-67	43	LOC_Os05g42180	r	5e-45	66	OsbHLH067	AtbHLH112-like/
GmbHLH172	Glyma06g40760	AT3G20640		AtbHLH123	Symbols:	basic helix-loop-helix (bHLH) DNA-binding superfamily	6e-67	42	LOC_Os05g42180		3e-45	66	OsbHLH067	AtbHLH112-like/
GmbHLH173	Glyma07g02120	AT4G29100		AtbHLH068	Symbols:	basic helix-loop-helix (bHLH) DNA-binding superfamily	1e-53	45	LOC_Os02g17680		8e-53	56	OsbHLH072	AtbHLH068-like/ethylene-responsive family protein-like
GmbHLH174	Glyma08g21770	AT4G29100		AtbHLH068	Symbols:	basic helix-loop-helix (bHLH) DNA-binding superfamily	9e-53	58	LOC_Os02g17680		4e-52	56	OsbHLH072	AtbHLH068-like/ethylene-responsive family protein-like
GmbHLH175	Glyma15g02020	AT4G29100		AtbHLH068	Symbols:	basic helix-loop-helix (bHLH) DNA-binding superfamily	7e-49	57	LOC_Os02g17680		2e-47	53	OsbHLH072	AtbHLH068-like/ethylene-responsive family protein-like
GmbHLH176	Glyma05g35610	AT4G29100		AtbHLH068	Symbols:	basic helix-loop-helix (bHLH) DNA-binding superfamily	1e-73	44	LOC_Os05g14010	r	1e-60	44	OsbHLH073	AtbHLH068-like/
GmbHLH177	Glyma08g04110	AT4G29100	r	AtbHLH068	Symbols:	basic helix-loop-helix (bHLH) DNA-binding superfamily	2e-74	44	LOC_Os05g14010		1e-56	42	OsbHLH073	AtbHLH068-like/
GmbHLH178	Glyma07g09180	AT4G29100		AtbHLH068	Symbols:	basic helix-loop-helix (bHLH) DNA-binding superfamily	6e-74	57	LOC_Os05g14010		4e-65	40	OsbHLH073	AtbHLH068-like/
GmbHLH179	Glyma16g24660	AT1G27660	r	AtbHLH110	Symbols:	basic helix-loop-helix (bHLH) DNA-binding superfamily	9e-32	54	LOC_Os01g01600		2e-24	49	OsbHLH071	AtbHLH110-like/putative ethylene-responsive protein
GmbHLH18	Glyma03g39990	AT1G72210		AtbHLH096	Symbols:	basic helix-loop-helix (bHLH) DNA-binding superfamily	6e-56	46	LOC_Os03g08930		6e-67	46	OsbHLH044	AtbHLH096-like/
GmbHLH180	Glyma02g05970	AT1G27660		AtbHLH110	Symbols:	basic helix-loop-helix (bHLH) DNA-binding superfamily	2e-30	61	LOC_Os01g01600		3e-23	51	OsbHLH071	AtbHLH110-like/putative ethylene-responsive protein
GmbHLH181	Glyma20g32520	AT1G31050		AtbHLH111	Symbols:	basic helix-loop-helix (bHLH) DNA-binding superfamily	8e-55	36	LOC_Os07g28890	r	3e-53	52	OsbHLH077	AtbHLH111-like/
GmbHLH182	Glyma10g35040	AT1G31050	r	AtbHLH111	Symbols:	basic helix-loop-helix (bHLH) DNA-binding superfamily	4e-56	37	LOC_Os07g28890		5e-58	37	OsbHLH077	AtbHLH111-like/
GmbHLH183	Glyma02g15520	AT1G05710	r	AtbHLH153	Symbols:	basic helix-loop-helix (bHLH) DNA-binding superfamily	3e-45	61	LOC_Os04g41570	r	3e-32	53	OsbHLH065	0
GmbHLH184	Glyma07g32980	AT1G05710		AtbHLH153	Symbols:	basic helix-loop-helix (bHLH) DNA-binding superfamily	3e-47	61	LOC_Os04g41570		2e-31	51	OsbHLH065	0
GmbHLH185	Glyma20g26980	AT2G14760		AtbHLH084	Symbols:	basic helix-loop-helix (bHLH) DNA-binding superfamily	1e-32	59	LOC_Os12g39850		2e-30	71	OsbHLH130	AtbHLH085-like/
GmbHLH186	Glyma10g40360	AT2G14760		AtbHLH084	Symbols:	basic helix-loop-helix (bHLH) DNA-binding superfamily	1e-34	61	LOC_Os12g39850		1e-32	76	OsbHLH130	AtbHLH085-like/
GmbHLH187	Glyma17g35420	AT1G27740		AtbHLH054	Symbols: RSL4	root hair defective 6-like 4	3e-37	60	LOC_Os12g39850		1e-32	71	OsbHLH130	AtbHLH085-like/
GmbHLH188	Glyma14g09770	AT2G14760	r	AtbHLH084	Symbols:	basic helix-loop-helix (bHLH) DNA-binding superfamily	3e-36	77	LOC_Os12g39850	r	2e-33	72	OsbHLH130	AtbHLH085-like/
GmbHLH189	Glyma04g04800	AT4G33880		AtbHLH085	Symbols: RSL2	ROOT HAIR DEFECTIVE 6-LIKE 2	7e-36	65	LOC_Os12g39850		6e-31	68	OsbHLH130	AtbHLH085-like/
GmbHLH19	Glyma20g37550	AT1G72210		AtbHLH096	Symbols:	basic helix-loop-helix (bHLH) DNA-binding superfamily	2e-65	46	LOC_Os03g08930	r	9e-64	44	OsbHLH044	AtbHLH096-like/
GmbHLH190	Glyma20g26990	AT2G14760		AtbHLH084	Symbols:	basic helix-loop-helix (bHLH) DNA-binding superfamily	7e-11	96	LOC_Os11g41640		8e-10	93	OsbHLH132	0
GmbHLH191	Glyma18g04420	AT5G37800		AtbHLH086	Symbols: RSL1, ATRSL1	RHD SIX-LIKE 1	4e-45	40	LOC_Os02g48060	r	2e-37	45	OsbHLH126	AtbHLH083-like/
GmbHLH192	Glyma11g33840	AT5G37800		AtbHLH086	Symbols: RSL1, ATRSL1	RHD SIX-LIKE 1	1e-46	56	LOC_Os02g48060		6e-44	48	OsbHLH126	AtbHLH083-like/
GmbHLH193	Glyma02g41370	AT5G37800		AtbHLH086	Symbols: RSL1, ATRSL1	RHD SIX-LIKE 1	1e-51	48	LOC_Os02g48060		3e-43	71	OsbHLH126	AtbHLH083-like/
GmbHLH194	Glyma14g07590	AT5G37800	r	AtbHLH086	Symbols: RSL1, ATRSL1	RHD SIX-LIKE 1	9e-52	48	LOC_Os02g48060		5e-44	70	OsbHLH126	AtbHLH083-like/
GmbHLH195	Glyma0732s00200	AT5G01310		AtbHLH140	Symbols: APTX	APRATAXIN-like	8e-25	74	LOC_Os01g61480	r	5e-25	80	OsbHLH123	0
GmbHLH196	Glyma07g18650	AT5G01310		AtbHLH140	Symbols: APTX	APRATAXIN-like	3e-24	75	LOC_Os01g61480		4e-24	80	OsbHLH123	0
GmbHLH197	Glyma03g06800	AT5G01310		AtbHLH140	Symbols: APTX	APRATAXIN-like	2e-26	86	LOC_Os01g61480		6e-25	79	OsbHLH123	0
GmbHLH198	Glyma01g30660	AT5G01310		AtbHLH140	Symbols: APTX	APRATAXIN-like	2e-26	82	LOC_Os01g61480		1e-23	76	OsbHLH123	0
GmbHLH199	Glyma17g19830	AT5G67060		AtbHLH088	Symbols: HEC1	basic helix-loop-helix (bHLH) DNA-binding	1e-34	75	LOC_Os08g36740		4e-31	68	OsbHLH121	AtbHLH088-like/
GmbHLH2	Glyma08g09420	AT2G31220		AtbHLH010	Symbols:	basic helix-loop-helix (bHLH) DNA-binding superfamily	5e-53	34	LOC_Os04g51070		1e-42	35	OsbHLH141	AtbHLH091-like/
GmbHLH20	Glyma10g29760	AT1G72210		AtbHLH096	Symbols:	basic helix-loop-helix (bHLH) DNA-binding superfamily	8e-64	47	LOC_Os10g23050		2e-64	56	OsbHLH045	AtbHLH096-like/
GmbHLH200	Glyma11g05920	AT5G67060	r	AtbHLH088	Symbols: HEC1	basic helix-loop-helix (bHLH) DNA-binding	6e-35	49	LOC_Os08g36740		5e-31	65	OsbHLH121	AtbHLH088-like/
GmbHLH201	Glyma01g39360	AT3G50330		AtbHLH037	Symbols: HEC2	basic helix-loop-helix (bHLH) DNA-binding	7e-34	67	LOC_Os08g36740		6e-31	67	OsbHLH121	AtbHLH088-like/
GmbHLH202	Glyma05g19920	AT5G67060		AtbHLH088	Symbols: HEC1	basic helix-loop-helix (bHLH) DNA-binding	7e-35	75	LOC_Os08g36740		2e-31	68	OsbHLH121	AtbHLH088-like/
GmbHLH203	Glyma04g04190	AT3G50330		AtbHLH037	Symbols: HEC2	basic helix-loop-helix (bHLH) DNA-binding	2e-33	47	LOC_Os08g36740		2e-32	47	OsbHLH121	AtbHLH088-like/
GmbHLH204	Glyma06g04380	AT3G50330		AtbHLH037	Symbols: HEC2	basic helix-loop-helix (bHLH) DNA-binding	4e-33	68	LOC_Os08g36740	r	9e-33	68	OsbHLH121	AtbHLH088-like/
GmbHLH205	Glyma05g32410	AT4G00120	r	AtbHLH040	Symbols: IND1, GT140, IND, EDA33	basic helix-loop-helix (bHLH)	4e-38	83	LOC_Os08g01700		1e-36	91	OsbHLH124	AtbHLH043-like/
GmbHLH206	Glyma08g16570	AT5G09750	r	AtbHLH043	Symbols: HEC3	basic helix-loop-helix (bHLH) DNA-binding	9e-38	95	LOC_Os08g01700	r	8e-36	91	OsbHLH124	AtbHLH043-like/
GmbHLH207	Glyma04g39210	AT4G00120		AtbHLH040	Symbols: IND1, GT140, IND, EDA33	basic helix-loop-helix (bHLH)	5e-36	83	LOC_Os08g01700		3e-34	88	OsbHLH124	AtbHLH043-like/
GmbHLH208	Glyma06g15730	AT4G00120		AtbHLH040	Symbols: IND1, GT140, IND, EDA33	basic helix-loop-helix (bHLH)	7e-35	82	LOC_Os08g01700		3e-33	87	OsbHLH124	AtbHLH043-like/
GmbHLH209	Glyma13g42900	AT3G21330		AtbHLH087	Symbols:	basic helix-loop-helix (bHLH) DNA-binding superfamily	2e-57	43	LOC_Os01g51140		8e-36	62	OsbHLH118	0
GmbHLH21	Glyma06g35330	AT1G72210		AtbHLH096	Symbols:	basic helix-loop-helix (bHLH) DNA-binding superfamily	1e-57	54	LOC_Os02g46560	r	1e-64	48	OsbHLH049	AtbHLH096-like/
GmbHLH210	Glyma15g02530	AT3G21330		AtbHLH087	Symbols:	basic helix-loop-helix (bHLH) DNA-binding superfamily	3e-60	50	LOC_Os01g51140		4e-35	60	OsbHLH118	0
GmbHLH211	Glyma07g01610	AT3G21330		AtbHLH087	Symbols:	basic helix-loop-helix (bHLH) DNA-binding superfamily	2e-63	49	LOC_Os01g51140		4e-39	64	OsbHLH118	0
GmbHLH212	Glyma08g21130	AT3G21330	r	AtbHLH087	Symbols:	basic helix-loop-helix (bHLH) DNA-binding superfamily	1e-66	51	LOC_Os01g51140		2e-40	65	OsbHLH118	0
GmbHLH213	Glyma15g41400	AT1G30670		AtbHLH052	Symbols:	basic helix-loop-helix (bHLH) DNA-binding superfamily	3e-14	38	LOC_Os01g38610		2e-10	55	OsbHLH117	0
GmbHLH214	Glyma08g17730	AT1G30670		AtbHLH052	Symbols:	basic helix-loop-helix (bHLH) DNA-binding superfamily	1e-17	43	LOC_Os12g31430	r	3e-10	45	#N/A	#N/A
GmbHLH215	Glyma12g32310	AT3G22100	r	AtbHLH117	Symbols:	basic helix-loop-helix (bHLH) DNA-binding superfamily	2e-18	42	LOC_Os01g38610		6e-11	52	OsbHLH117	0
GmbHLH216	Glyma01g32890	AT4G00050		AtbHLH016	Symbols: UNE10	basic helix-loop-helix (bHLH) DNA-binding	1e-11	91	LOC_Os10g40740		1e-11	91	OsbHLH113	0
GmbHLH217	Glyma03g04000	AT4G00050		AtbHLH016	Symbols: UNE10	basic helix-loop-helix (bHLH) DNA-binding	2e-39	39	LOC_Os10g40740		1e-21	54	OsbHLH113	0
GmbHLH218	Glyma11g17120	AT4G00050		AtbHLH016	Symbols: UNE10	basic helix-loop-helix (bHLH) DNA-binding	3e-78	44	LOC_Os10g40740		2e-34	36	OsbHLH113	0
GmbHLH219	Glyma01g15930	AT4G00050	r	AtbHLH016	Symbols: UNE10	basic helix-loop-helix (bHLH) DNA-binding	4e-86	46	LOC_Os10g40740	r	9e-35	34	OsbHLH113	0
GmbHLH22	Glyma08g36590	AT1G72210		AtbHLH096	Symbols:	basic helix-loop-helix (bHLH) DNA-binding superfamily	9e-56	54	LOC_Os02g46560		1e-61	48	OsbHLH049	AtbHLH096-like/
GmbHLH220	Glyma19g41260	AT1G09530		AtbHLH008	Symbols: PIF3, POC1, PAP3	phytochrome interacting factor 3	4e-35	32	LOC_Os01g18290		1e-19	25	OsbHLH105	PIF3-like/putative BP-5 protein
GmbHLH221	Glyma03g38670	AT1G09530		AtbHLH008	Symbols: PIF3, POC1, PAP3	phytochrome interacting factor 3	3e-38	32	LOC_Os01g18290		8e-34	35	OsbHLH105	PIF3-like/putative BP-5 protein
GmbHLH222	Glyma20g22280	AT1G09530		AtbHLH008	Symbols: PIF3, POC1, PAP3	phytochrome interacting factor 3	4e-42	61	LOC_Os01g18290		6e-43	58	OsbHLH105	PIF3-like/putative BP-5 protein
GmbHLH223	Glyma10g28290	AT1G09530	r	AtbHLH008	Symbols: PIF3, POC1, PAP3	phytochrome interacting factor 3	7e-43	61	LOC_Os01g18290	r	3e-46	37	OsbHLH105	PIF3-like/putative BP-5 protein
GmbHLH224	Glyma10g04890	AT2G20180		AtbHLH015	Symbols: PIL5	phytochrome interacting factor 3-like 5	7e-37	60	LOC_Os03g56950		2e-34	65	OsbHLH152	PIF4-like/
GmbHLH225	Glyma13g19250	AT2G20180	r	AtbHLH015	Symbols: PIL5	phytochrome interacting factor 3-like 5	2e-41	36	LOC_Os12g41650		3e-30	72	OsbHLH102	PIF4-like/OsBP-5*
GmbHLH226	Glyma03g32740	AT2G20180		AtbHLH015	Symbols: PIL5, PIF1	phytochrome interacting factor 3-like 5	2e-39	54	LOC_Os03g43810	r	2e-34	81	OsbHLH103	/transcription factor BHLH9-like protein
GmbHLH227	Glyma11g05810	AT4G36930		AtbHLH024	Symbols: SPT	basic helix-loop-helix (bHLH) DNA-binding	6e-34	49	LOC_Os06g06900		2e-32	50	OsbHLH108	0
GmbHLH228	Glyma01g39450	AT4G36930	r	AtbHLH024	Symbols: SPT	basic helix-loop-helix (bHLH) DNA-binding	5e-34	86	LOC_Os06g06900	r	6e-31	82	OsbHLH108	0
GmbHLH229	Glyma17g35950	AT4G36930		AtbHLH024	Symbols: SPT	basic helix-loop-helix (bHLH) DNA-binding	1e-22	96	LOC_Os06g06900		2e-22	94	OsbHLH108	0
GmbHLH23	Glyma15g11130	AT3G06120		AtbHLH045	Symbols: MUTE	basic helix-loop-helix (bHLH) DNA-binding	3e-58	65	LOC_Os05g51820		6e-43	50	OsbHLH055	AtbHLH045-like/
GmbHLH230	Glyma14g09230	AT4G36930		AtbHLH024	Symbols: SPT	basic helix-loop-helix (bHLH) DNA-binding	2e-16	95	LOC_Os06g06900		2e-16	92	OsbHLH108	0
GmbHLH231	Glyma17g19500	AT4G36930		AtbHLH024	Symbols: SPT	basic helix-loop-helix (bHLH) DNA-binding	2e-30	79	LOC_Os06g06900		8e-30	60	OsbHLH108	0
GmbHLH232	Glyma18g14530	AT2G43010		AtbHLH009	Symbols: PIF4, SRL2, AtPIF4	phytochrome interacting factor 4	5e-38	50	LOC_Os03g56950	r	2e-40	56	OsbHLH152	PIF4-like/
GmbHLH233	Glyma08g41620	AT3G59060	r	AtbHLH065	Symbols: PIL6, PIF5	phytochrome interacting factor 3-like 6	6e-41	43	LOC_Os12g41650	r	7e-50	35	OsbHLH102	PIF4-like/OsBP-5*
GmbHLH234	Glyma14g03600	AT3G59060		AtbHLH065	Symbols: PIL6, PIF5	phytochrome interacting factor 3-like 6	3e-34	37	LOC_Os03g56950		3e-37	49	OsbHLH152	PIF4-like/
GmbHLH235	Glyma02g45150	AT3G59060		AtbHLH065	Symbols: PIL6, PIF5	phytochrome interacting factor 3-like 6	3e-37	38	LOC_Os12g41650		6e-45	32	OsbHLH102	PIF4-like/OsBP-5*
GmbHLH236	Glyma19g40980	AT1G09530		AtbHLH008	Symbols: PIF3, POC1, PAP3	phytochrome interacting factor 3	2e-25	48	LOC_Os01g18290		3e-27	34	OsbHLH105	PIF3-like/putative BP-5 protein
GmbHLH237	Glyma03g38390	AT1G09530		AtbHLH008	Symbols: PIF3, POC1, PAP3	phytochrome interacting factor 3	2e-26	52	LOC_Os01g18290		2e-27	48	OsbHLH105	PIF3-like/putative BP-5 protein
GmbHLH238	Glyma02g00980	AT1G09530		AtbHLH008	Symbols: PIF3, POC1, PAP3	phytochrome interacting factor 3	3e-29	65	LOC_Os01g18290		3e-31	60	OsbHLH105	PIF3-like/putative BP-5 protein
GmbHLH239	Glyma10g27910	AT2G46970	r	AtbHLH124	Symbols: PIL1	phytochrome interacting factor 3-like 1	2e-33	39	LOC_Os01g18290		5e-36	39	OsbHLH105	PIF3-like/putative BP-5 protein
GmbHLH24	Glyma13g27880	AT3G06120	r	AtbHLH045	Symbols: MUTE	basic helix-loop-helix (bHLH) DNA-binding	2e-64	67	LOC_Os05g51820		7e-49	50	OsbHLH055	AtbHLH045-like/
GmbHLH240	Glyma19g32600	AT2G42280		AtbHLH130	Symbols:	basic helix-loop-helix (bHLH) DNA-binding superfamily	2e-50	35	LOC_Os09g31300		4e-26	59	OsbHLH143	0
GmbHLH241	Glyma03g29750	AT2G42280		AtbHLH130	Symbols:	basic helix-loop-helix (bHLH) DNA-binding superfamily	6e-52	36	LOC_Os08g39630		1e-34	60	OsbHLH112	AtbHLH130-like/
GmbHLH242	Glyma02g29830	AT2G42280	r	AtbHLH130	Symbols:	basic helix-loop-helix (bHLH) DNA-binding superfamily	9e-75	48	LOC_Os08g39630		1e-56	40	OsbHLH112	AtbHLH130-like/
GmbHLH243	Glyma10g12150	AT2G42280		AtbHLH130	Symbols:	basic helix-loop-helix (bHLH) DNA-binding superfamily	3e-68	44	LOC_Os08g39630		1e-54	47	OsbHLH112	AtbHLH130-like/
GmbHLH244	Glyma13g41670	AT2G42280		AtbHLH130	Symbols:	basic helix-loop-helix (bHLH) DNA-binding superfamily	7e-55	46	LOC_Os08g39630		6e-56	50	OsbHLH112	AtbHLH130-like/
GmbHLH245	Glyma15g03740	AT1G51140		AtbHLH122	Symbols:	basic helix-loop-helix (bHLH) DNA-binding superfamily	2e-43	35	LOC_Os08g39630		5e-56	51	OsbHLH112	AtbHLH130-like/
GmbHLH246	Glyma11g13960	AT1G51140	r	AtbHLH122	Symbols:	basic helix-loop-helix (bHLH) DNA-binding superfamily	4e-68	41	LOC_Os08g39630		4e-55	37	OsbHLH112	AtbHLH130-like/
GmbHLH247	Glyma12g05930	AT2G42280		AtbHLH130	Symbols:	basic helix-loop-helix (bHLH) DNA-binding superfamily	3e-51	44	LOC_Os08g39630	r	3e-53	66	OsbHLH112	AtbHLH130-like/
GmbHLH248	Glyma08g26110	AT1G35460	r	AtbHLH080	Symbols:	basic helix-loop-helix (bHLH) DNA-binding superfamily	1e-31	45	LOC_Os08g39630		7e-25	58	OsbHLH112	AtbHLH130-like/
GmbHLH249	Glyma15g42680	AT2G42280		AtbHLH130	Symbols:	basic helix-loop-helix (bHLH) DNA-binding superfamily	2e-21	51	LOC_Os08g39630		7e-21	50	OsbHLH112	AtbHLH130-like/
GmbHLH25	Glyma14g31390	AT3G06120		AtbHLH045	Symbols: MUTE	basic helix-loop-helix (bHLH) DNA-binding	1e-33	40	LOC_Os06g33450		5e-29	79	OsbHLH054	AtbHLH098-like/
GmbHLH250	Glyma08g16190	AT2G42280		AtbHLH130	Symbols:	basic helix-loop-helix (bHLH) DNA-binding superfamily	2e-35	71	LOC_Os09g31300		4e-36	71	OsbHLH143	0
GmbHLH251	Glyma13g27460	AT2G42280		AtbHLH130	Symbols:	basic helix-loop-helix (bHLH) DNA-binding superfamily	6e-39	53	LOC_Os08g39630		2e-39	70	OsbHLH112	AtbHLH130-like/
GmbHLH252	Glyma12g36750	AT2G42280		AtbHLH130	Symbols:	basic helix-loop-helix (bHLH) DNA-binding superfamily	1e-44	34	LOC_Os08g39630		2e-40	34	OsbHLH112	AtbHLH130-like/
GmbHLH253	Glyma20g39220	AT1G05805	r	AtbHLH128	Symbols:	basic helix-loop-helix (bHLH) DNA-binding superfamily	6e-51	50	LOC_Os04g41229	r	2e-43	61	OsbHLH111	AtbHLH128-like/putative transcription factor RAU1
GmbHLH254	Glyma19g34360	AT4G02590	r	AtbHLH059	Symbols: UNE12	basic helix-loop-helix (bHLH) DNA-binding	1e-85	59	LOC_Os03g58330		2e-50	66	OsbHLH098	AtbHLH059-like/
GmbHLH255	Glyma03g31510	AT4G02590		AtbHLH059	Symbols: UNE12	basic helix-loop-helix (bHLH) DNA-binding	7e-86	58	LOC_Os03g58330		3e-51	66	OsbHLH098	AtbHLH059-like/
GmbHLH256	Glyma10g03690	AT4G02590		AtbHLH059	Symbols: UNE12	basic helix-loop-helix (bHLH) DNA-binding	2e-79	58	LOC_Os03g58330	r	2e-53	68	OsbHLH098	AtbHLH059-like/
GmbHLH257	Glyma02g16110	AT4G02590		AtbHLH059	Symbols: UNE12	basic helix-loop-helix (bHLH) DNA-binding	3e-78	55	LOC_Os03g58330		2e-43	56	OsbHLH098	AtbHLH059-like/
GmbHLH258	Glyma20g36770	AT4G02590		AtbHLH059	Symbols: UNE12	basic helix-loop-helix (bHLH) DNA-binding	8e-52	63	LOC_Os03g58330		6e-51	62	OsbHLH098	AtbHLH059-like/
GmbHLH259	Glyma10g30430	AT4G02590		AtbHLH059	Symbols: UNE12	basic helix-loop-helix (bHLH) DNA-binding	3e-51	62	LOC_Os03g58330		1e-50	61	OsbHLH098	AtbHLH059-like/
GmbHLH26	Glyma13g08740	AT5G53210		AtbHLH098	Symbols: SPCH	basic helix-loop-helix (bHLH) DNA-binding	2e-35	48	LOC_Os06g33450		1e-28	82	OsbHLH054	AtbHLH098-like/
GmbHLH260	Glyma15g33020	AT2G24260		AtbHLH066	Symbols: LRL1	LJRHL1-like 1	9e-45	44	LOC_Os09g25040		1e-37	44	OsbHLH100	AtbHLH066-like/bHLH transcription factor PTF1-like protein
GmbHLH261	Glyma09g14380	AT2G24260	r	AtbHLH066	Symbols: LRL1	LJRHL1-like 1	4e-17	42	LOC_Os09g25040	r	2e-38	46	OsbHLH100	AtbHLH066-like/bHLH transcription factor PTF1-like protein
GmbHLH262	Glyma17g08300	AT2G24260		AtbHLH066	Symbols: LRL1	LJRHL1-like 1	4e-52	48	LOC_Os09g25040		6e-44	47	OsbHLH100	AtbHLH066-like/bHLH transcription factor PTF1-like protein
GmbHLH263	Glyma17g34010	AT1G18400		AtbHLH044	Symbols: BEE1	BR enhanced expression 1	6e-43	53	LOC_Os06g16400		2e-25	67	OsbHLH086	AtbHLH049-like/putative TA1 protein
GmbHLH264	Glyma14g11790	AT1G18400		AtbHLH044	Symbols: BEE1	BR enhanced expression 1	6e-45	72	LOC_Os06g16400		6e-28	58	OsbHLH086	AtbHLH049-like/putative TA1 protein
GmbHLH265	Glyma05g35060	AT1G18400		AtbHLH044	Symbols: BEE1	BR enhanced expression 1	1e-47	72	LOC_Os01g68700		1e-30	44	OsbHLH090	GBOF1-like/
GmbHLH266	Glyma08g04660	AT1G73830		AtbHLH050	Symbols: BEE3	BR enhanced expression 3	1e-47	64	LOC_Os09g33580		5e-30	58	OsbHLH081	AtbHLH137-like/bHLH transcription factor GBOF-1-like
GmbHLH267	Glyma07g10310	AT1G73830		AtbHLH050	Symbols: BEE3	BR enhanced expression 3	3e-48	74	LOC_Os01g68700		2e-32	49	OsbHLH090	GBOF1-like/
GmbHLH268	Glyma09g31580	AT1G73830	r	AtbHLH050	Symbols: BEE3	BR enhanced expression 3	1e-47	81	LOC_Os08g42470		1e-30	58	OsbHLH080	AtbHLH137-like/
GmbHLH269	Glyma06g05180	AT1G10120		AtbHLH074	Symbols:	basic helix-loop-helix (bHLH) DNA-binding superfamily	2e-40	44	LOC_Os03g51910		5e-36	45	OsbHLH084	AtbHLH074-like/
GmbHLH27	Glyma04g41710	AT5G53210	r	AtbHLH098	Symbols: SPCH	basic helix-loop-helix (bHLH) DNA-binding	6e-78	49	LOC_Os02g15760		1e-57	47	OsbHLH053	0
GmbHLH270	Glyma0041s00210	AT1G10120		AtbHLH074	Symbols:	basic helix-loop-helix (bHLH) DNA-binding superfamily	9e-39	37	LOC_Os03g51910		1e-30	43	OsbHLH084	AtbHLH074-like/
GmbHLH271	Glyma14g10180	AT1G10120	r	AtbHLH074	Symbols:	basic helix-loop-helix (bHLH) DNA-binding superfamily	7e-66	40	LOC_Os06g16400		6e-49	58	OsbHLH086	AtbHLH049-like/putative TA1 protein
GmbHLH272	Glyma04g05090	AT1G10120		AtbHLH074	Symbols:	basic helix-loop-helix (bHLH) DNA-binding superfamily	9e-31	89	LOC_Os09g29830		6e-29	85	OsbHLH085	AtbHLH049-like/TA1 protein-like
GmbHLH273	Glyma19g32570	AT3G57800		AtbHLH060	Symbols:	basic helix-loop-helix (bHLH) DNA-binding superfamily	7e-81	49	LOC_Os03g51910		1e-35	52	OsbHLH084	AtbHLH074-like/
GmbHLH274	Glyma03g29710	AT3G57800	r	AtbHLH060	Symbols:	basic helix-loop-helix (bHLH) DNA-binding superfamily	4e-50	53	LOC_Os03g51910		8e-38	54	OsbHLH084	AtbHLH074-like/
GmbHLH275	Glyma10g12210	AT3G57800		AtbHLH060	Symbols:	basic helix-loop-helix (bHLH) DNA-binding superfamily	2e-68	43	LOC_Os03g51910		3e-34	62	OsbHLH084	AtbHLH074-like/
GmbHLH276	Glyma08g01210	AT5G50915		AtbHLH137	Symbols:	basic helix-loop-helix (bHLH) DNA-binding superfamily	2e-38	44	LOC_Os08g42470		6e-35	42	OsbHLH080	AtbHLH137-like/
GmbHLH277	Glyma05g38450	AT5G50915		AtbHLH137	Symbols:	basic helix-loop-helix (bHLH) DNA-binding superfamily	6e-42	76	LOC_Os08g42470		1e-40	54	OsbHLH080	AtbHLH137-like/
GmbHLH278	Glyma04g37690	AT5G50915		AtbHLH137	Symbols:	basic helix-loop-helix (bHLH) DNA-binding superfamily	1e-45	48	LOC_Os08g42470		1e-44	50	OsbHLH080	AtbHLH137-like/
GmbHLH279	Glyma06g17420	AT5G50915	r	AtbHLH137	Symbols:	basic helix-loop-helix (bHLH) DNA-binding superfamily	2e-44	50	LOC_Os08g42470	r	4e-43	50	OsbHLH080	AtbHLH137-like/
GmbHLH28	Glyma06g13080	AT5G53210		AtbHLH098	Symbols: SPCH	basic helix-loop-helix (bHLH) DNA-binding	1e-65	46	LOC_Os02g15760	r	1e-46	43	OsbHLH053	0
GmbHLH280	Glyma02g02930	AT1G59640		AtbHLH031	Symbols: ZCW32, BPE, BPEp	BIG PETAL P	4e-34	40	LOC_Os03g58830		3e-30	88	OsbHLH089	ZCW32-like/
GmbHLH281	Glyma04g34660	AT1G59640		AtbHLH031	Symbols: ZCW32, BPE, BPEub	BIG PETAL P	4e-58	73	LOC_Os07g09590		6e-60	64	OsbHLH094	AtbHLH088-like/
GmbHLH282	Glyma08g40540	AT1G59640		AtbHLH031	Symbols: ZCW32, BPE, BPEub	BIG PETAL P	3e-48	75	LOC_Os03g58830		4e-45	68	OsbHLH089	ZCW32-like/
GmbHLH283	Glyma06g20000	AT1G59640		AtbHLH031	Symbols: ZCW32, BPE, BPEub	BIG PETAL P	3e-59	67	LOC_Os03g58830	r	4e-62	67	OsbHLH089	ZCW32-like/
GmbHLH284	Glyma17g10290	AT1G59640		AtbHLH031	Symbols: ZCW32, BPE, BPEub	BIG PETAL P	3e-57	62	LOC_Os07g09590		3e-57	65	OsbHLH094	AtbHLH088-like/
GmbHLH285	Glyma01g04610	AT1G59640	r	AtbHLH031	Symbols: ZCW32, BPE, BPEub	BIG PETAL P	1e-67	52	LOC_Os07g09590		7e-59	74	OsbHLH094	AtbHLH088-like/
GmbHLH286	Glyma02g02940	AT1G59640		AtbHLH031	Symbols: ZCW32, BPE, BPEub	BIG PETAL P	1e-47	43	LOC_Os03g58830		8e-37	68	OsbHLH089	ZCW32-like/
GmbHLH287	Glyma05g01590	AT1G59640		AtbHLH031	Symbols: ZCW32, BPE, BPEub	BIG PETAL P	4e-52	57	LOC_Os07g09590		4e-51	57	OsbHLH094	AtbHLH088-like/
GmbHLH288	Glyma12g04670	AT4G34530		AtbHLH063	Symbols: CIB1	cryptochrome-interacting basic-helix-loop-helix 1	1e-46	50	LOC_Os09g32510		2e-43	48	OsbHLH092	GBOF1-like/TA1 protein
GmbHLH289	Glyma11g12450	AT1G68920		AtbHLH049	Symbols:	basic helix-loop-helix (bHLH) DNA-binding superfamily	1e-46	48	LOC_Os01g68700		1e-42	39	OsbHLH090	GBOF1-like/
GmbHLH29	Glyma11g16730	AT4G21330		AtbHLH022	Symbols: DYT1	basic helix-loop-helix (bHLH) DNA-binding	2e-15	35	LOC_Os02g02820		3e-06	42	OsbHLH005	AMS-Like/
GmbHLH290	Glyma04g01400	AT4G34530		AtbHLH063	Symbols: CIB1	cryptochrome-interacting basic-helix-loop-helix 1	2e-48	44	LOC_Os06g16400		9e-44	58	OsbHLH086	AtbHLH049-like/putative TA1 protein
GmbHLH291	Glyma06g01430	AT4G34530	r	AtbHLH063	Symbols: CIB1	cryptochrome-interacting basic-helix-loop-helix 1	4e-48	53	LOC_Os06g16400		1e-45	50	OsbHLH086	AtbHLH049-like/putative TA1 protein
GmbHLH292	Glyma02g13860	AT1G68920		AtbHLH049	Symbols:	basic helix-loop-helix (bHLH) DNA-binding superfamily	3e-50	39	LOC_Os09g29830		2e-68	43	OsbHLH085	AtbHLH049-like/TA1 protein-like
GmbHLH293	Glyma01g09400	AT1G68920	r	AtbHLH049	Symbols:	basic helix-loop-helix (bHLH) DNA-binding superfamily	7e-95	44	LOC_Os09g29830	r	2e-71	43	OsbHLH085	AtbHLH049-like/TA1 protein-like
GmbHLH294	Glyma03g21770	AT3G07340	r	AtbHLH062	Symbols:	basic helix-loop-helix (bHLH) DNA-binding superfamily	6e-80	43	LOC_Os01g68700		3e-56	37	OsbHLH090	GBOF1-like/
GmbHLH295	Glyma18g32560	AT3G07340		AtbHLH062	Symbols:	basic helix-loop-helix (bHLH) DNA-binding superfamily	6e-79	43	LOC_Os01g68700		4e-70	40	OsbHLH090	GBOF1-like/
GmbHLH296	Glyma08g46040	AT3G07340		AtbHLH062	Symbols:	basic helix-loop-helix (bHLH) DNA-binding superfamily	2e-78	39	LOC_Os01g68700	r	6e-70	40	OsbHLH090	GBOF1-like/
GmbHLH297	Glyma16g10620	AT3G07340		AtbHLH062	Symbols:	basic helix-loop-helix (bHLH) DNA-binding superfamily	5e-61	52	LOC_Os01g68700		3e-56	56	OsbHLH090	GBOF1-like/
GmbHLH298	Glyma19g31350	AT2G41240		AtbHLH100	Symbols: BHLH100	basic helix-loop-helix protein 100	2e-14	32	LOC_Os01g72370		1e-14	33	OsbHLH056	0
GmbHLH299	Glyma03g28610	AT3G56970		AtbHLH038	Symbols: BHLH038, ORG2	basic helix-loop-helix (bHLH)	5e-33	48	LOC_Os01g72370		7e-28	43	OsbHLH056	0
GmbHLH3	Glyma16g12110	AT2G31210		AtbHLH091	Symbols:	basic helix-loop-helix (bHLH) DNA-binding superfamily	5e-28	28	LOC_Os04g51070		1e-20	39	OsbHLH141	AtbHLH091-like/
GmbHLH30	Glyma07g30730	AT4G21330		AtbHLH022	Symbols: DYT1	basic helix-loop-helix (bHLH) DNA-binding	8e-28	49	LOC_Os02g02820		6e-11	27	OsbHLH005	AMS-Like/
GmbHLH300	Glyma03g28630	AT3G56970		AtbHLH038	Symbols: BHLH038, ORG2	basic helix-loop-helix (bHLH)	2e-43	43	LOC_Os01g72370	r	1e-32	47	OsbHLH056	0
GmbHLH301	Glyma04g35380	AT4G20970		AtbHLH162	Symbols:	basic helix-loop-helix (bHLH) DNA-binding superfamily	7e-21	36	LOC_Os01g01870		1e-31	41	#N/A	#N/A
GmbHLH302	Glyma06g19490	AT4G20970		AtbHLH162	Symbols:	basic helix-loop-helix (bHLH) DNA-binding superfamily	9e-21	34	LOC_Os01g01870	r	4e-31	38	#N/A	#N/A
GmbHLH303	Glyma17g09810	AT4G20970		AtbHLH162	Symbols:	basic helix-loop-helix (bHLH) DNA-binding superfamily	5e-13	29	LOC_Os01g01870		9e-14	30	#N/A	#N/A
GmbHLH304	Glyma05g02110	AT4G20970		AtbHLH162	Symbols:	basic helix-loop-helix (bHLH) DNA-binding superfamily	5e-20	33	LOC_Os01g01870		8e-24	37	#N/A	#N/A
GmbHLH305	Glyma13g24730	AT4G20970		AtbHLH162	Symbols:	basic helix-loop-helix (bHLH) DNA-binding superfamily	2e-25	36	LOC_Os01g01870		3e-12	27	#N/A	#N/A
GmbHLH306	Glyma07g31710	AT4G20970		AtbHLH162	Symbols:	basic helix-loop-helix (bHLH) DNA-binding superfamily	2e-33	40	LOC_Os02g13670	r	4e-15	25	#N/A	#N/A
GmbHLH307	Glyma15g08140	AT4G20970	r	AtbHLH162	Symbols:	basic helix-loop-helix (bHLH) DNA-binding superfamily	4e-34	45	LOC_Os01g01870		3e-13	28	#N/A	#N/A
GmbHLH308	Glyma12g12880	AT4G20970		AtbHLH162	Symbols:	basic helix-loop-helix (bHLH) DNA-binding superfamily	2e-27	39	LOC_Os01g01870		2e-11	26	#N/A	#N/A
GmbHLH309	Glyma06g44660	AT4G20970		AtbHLH162	Symbols:	basic helix-loop-helix (bHLH) DNA-binding superfamily	7e-24	39	LOC_Os01g01870		7e-09	26	#N/A	#N/A
GmbHLH31	Glyma14g13500	AT4G21330		AtbHLH022	Symbols: DYT1	basic helix-loop-helix (bHLH) DNA-binding	1e-11	39	LOC_Os02g02820		7	35	OsbHLH005	AMS-Like/
GmbHLH310	Glyma12g33260	AT4G20970		AtbHLH162	Symbols:	basic helix-loop-helix (bHLH) DNA-binding superfamily	2e-26	40	LOC_Os01g01870		7e-11	26	#N/A	#N/A
GmbHLH311	Glyma20g29120	AT5G51780		AtbHLH036	Symbols:	basic helix-loop-helix (bHLH) DNA-binding superfamily	4e-27	44	LOC_Os01g72370		7e-05	33	OsbHLH056	0
GmbHLH312	Glyma10g38630	AT4G25400		AtbHLH118	Symbols:	basic helix-loop-helix (bHLH) DNA-binding superfamily	1e-23	39	LOC_Os01g72370		9e-06	34	OsbHLH056	0
GmbHLH313	Glyma16g32620	AT4G25410		AtbHLH126	Symbols:	basic helix-loop-helix (bHLH) DNA-binding superfamily	2e-31	41	LOC_Os08g37730		7e-05	32	OsbHLH047	AtbHLH096-like/
GmbHLH314	Glyma09g27630	AT4G25410	r	AtbHLH126	Symbols:	basic helix-loop-helix (bHLH) DNA-binding superfamily	2e-27	41	LOC_Os01g72370		0.001	36	OsbHLH056	0
GmbHLH315	Glyma16g32610	AT4G25410		AtbHLH126	Symbols:	basic helix-loop-helix (bHLH) DNA-binding superfamily	3e-28	39	LOC_Os01g72370		8e-09	29	OsbHLH056	0
GmbHLH316	Glyma09g27610	AT5G51790		AtbHLH120	Symbols:	basic helix-loop-helix (bHLH) DNA-binding superfamily	1e-24	38	LOC_Os01g72370		3e-08	28	OsbHLH056	0
GmbHLH317	Glyma10g38620	AT5G51780		AtbHLH036	Symbols:	basic helix-loop-helix (bHLH) DNA-binding superfamily	6e-31	42	LOC_Os01g72370		0.0003	25	OsbHLH056	0
GmbHLH318	Glyma20g29130	AT5G51780		AtbHLH036	Symbols:	basic helix-loop-helix (bHLH) DNA-binding superfamily	8e-17	35	LOC_Os01g01870		0.0003	21	#N/A	#N/A
GmbHLH319	Glyma02g11500	AT1G49770	r	AtbHLH095	Symbols: RGE1, ZOU	basic helix-loop-helix (bHLH) DNA-binding	1e-18	66	LOC_Os04g35010	r	3e-17	59	OsbHLH144	0
GmbHLH32	Glyma13g32370	AT4G21330		AtbHLH022	Symbols: DYT1	basic helix-loop-helix (bHLH) DNA-binding	3e-18	39	LOC_Os02g02820		0.0001	47	OsbHLH005	AMS-Like/
GmbHLH33	Glyma15g06950	AT4G21330	r	AtbHLH022	Symbols: DYT1	basic helix-loop-helix (bHLH) DNA-binding	1e-21	39	LOC_Os02g02820		2e-06	41	OsbHLH005	AMS-Like/
GmbHLH34	Glyma15g06960	AT4G21330		AtbHLH022	Symbols: DYT1	basic helix-loop-helix (bHLH) DNA-binding	8e-31	41	LOC_Os02g02820		1e-16	31	OsbHLH005	AMS-Like/
GmbHLH35	Glyma04g09580	AT5G65640		AtbHLH093	Symbols: bHLH093	beta HLH protein 93	1e-68	66	LOC_Os03g04310		2e-58	59	OsbHLH003	AtbHLH93-like/
GmbHLH36	Glyma06g09670	AT5G65640		AtbHLH093	Symbols: bHLH093	beta HLH protein 93	7e-68	64	LOC_Os03g04310		2e-55	57	OsbHLH003	AtbHLH93-like/
GmbHLH37	Glyma14g36370	AT5G65640		AtbHLH093	Symbols: bHLH093	beta HLH protein 93	6e-67	67	LOC_Os03g04310		7e-58	61	OsbHLH003	AtbHLH93-like/
GmbHLH38	Glyma02g38240	AT5G65640		AtbHLH093	Symbols: bHLH093	beta HLH protein 93	2e-64	65	LOC_Os03g04310		3e-55	60	OsbHLH003	AtbHLH93-like/
GmbHLH39	Glyma01g02390	AT5G65640	r	AtbHLH093	Symbols: bHLH093	beta HLH protein 93	1e-59	69	LOC_Os03g04310		3e-56	61	OsbHLH003	AtbHLH93-like/
GmbHLH4	Glyma18g44280	AT2G40435		#N/A	Symbols:	BEST Arabidopsis thaliana protein match is:	5e-39	57	LOC_Os05g27090		2e-34	53	OsbHLH162	0
GmbHLH40	Glyma08g37240	AT5G65640		AtbHLH093	Symbols: bHLH093	beta HLH protein 93	2e-63	63	LOC_Os03g04310		6e-50	57	OsbHLH003	AtbHLH93-like/
GmbHLH41	Glyma09g33590	AT5G65640		AtbHLH093	Symbols: bHLH093	beta HLH protein 93	4e-66	66	LOC_Os03g04310	r	2e-58	43	OsbHLH003	AtbHLH93-like/
GmbHLH42	Glyma19g27480	AT3G26744		AtbHLH116	Symbols: ICE1, ATICE1, SCRM	basic helix-loop-helix (bHLH)	4e-76	74	LOC_Os11g32100		2e-67	66	OsbHLH002	ICE1-like/
GmbHLH43	Glyma16g05390	AT3G26744		AtbHLH116	Symbols: ICE1, ATICE1, SCRM	basic helix-loop-helix (bHLH)	2e-68	67	LOC_Os11g32100		1e-72	50	OsbHLH002	ICE1-like/
GmbHLH44	Glyma04g37750	AT3G26744	r	AtbHLH116	Symbols: ICE1, ATICE1, SCRM	basic helix-loop-helix (bHLH)	e-100	64	LOC_Os11g32100	r	2e-89	60	OsbHLH002	ICE1-like/
GmbHLH45	Glyma06g17330	AT3G26744		AtbHLH116	Symbols: ICE1, ATICE1, SCRM	basic helix-loop-helix (bHLH)	1e-97	66	LOC_Os11g32100		1e-93	61	OsbHLH002	ICE1-like/
GmbHLH46	Glyma05g38530	AT3G26744		AtbHLH116	Symbols: ICE1, ATICE1, SCRM	basic helix-loop-helix (bHLH)	7e-85	58	LOC_Os11g32100		3e-78	54	OsbHLH002	ICE1-like/
GmbHLH47	Glyma16g26290	AT3G26744		AtbHLH116	Symbols: ICE1, ATICE1, SCRM	basic helix-loop-helix (bHLH)	1e-75	72	LOC_Os01g70310		1e-68	67	OsbHLH001	ICE1-like/
GmbHLH48	Glyma20g24170	AT2G16910		AtbHLH021	Symbols: AMS	basic helix-loop-helix (bHLH) DNA-binding	e-115	45	LOC_Os02g02820		1e-44	45	OsbHLH005	AMS-Like/
GmbHLH49	Glyma10g42830	AT2G16910	r	AtbHLH021	Symbols: AMS	basic helix-loop-helix (bHLH) DNA-binding	e-121	46	LOC_Os02g02820	r	2e-44	45	OsbHLH005	AMS-Like/
GmbHLH5	Glyma09g41470	AT2G40435		#N/A	Symbols:	BEST Arabidopsis thaliana protein match is:	2e-41	56	LOC_Os07g47960		5e-40	56	OsbHLH163	0
GmbHLH50	Glyma17g06610	AT4G29930		AtbHLH027	Symbols:	basic helix-loop-helix (bHLH) DNA-binding superfamily	7e-27	43	LOC_Os04g23550	r	3e-36	41	OsbHLH006	AtbHLH35-like/RERJ1*
GmbHLH51	Glyma13g00480	AT5G57150		AtbHLH035	Symbols:	basic helix-loop-helix (bHLH) DNA-binding superfamily	3e-39	47	LOC_Os04g23550		8e-22	37	OsbHLH006	AtbHLH35-like/RERJ1*
GmbHLH52	Glyma15g18070	AT5G57150		AtbHLH035	Symbols:	basic helix-loop-helix (bHLH) DNA-binding superfamily	4e-60	57	LOC_Os04g23550		3e-33	40	OsbHLH006	AtbHLH35-like/RERJ1*
GmbHLH53	Glyma09g06770	AT5G57150	r	AtbHLH035	Symbols:	basic helix-loop-helix (bHLH) DNA-binding superfamily	2e-67	56	LOC_Os04g23550		6e-35	39	OsbHLH006	AtbHLH35-like/RERJ1*
GmbHLH54	Glyma18g19110	AT1G10610		AtbHLH090	Symbols:	basic helix-loop-helix (bHLH) DNA-binding superfamily	4e-36	31	LOC_Os02g02820		4e-14	52	OsbHLH005	AMS-Like/
GmbHLH55	Glyma08g39470	AT1G10610	r	AtbHLH090	Symbols:	basic helix-loop-helix (bHLH) DNA-binding superfamily	3e-33	43	LOC_Os02g02820		1e-24	34	OsbHLH005	AMS-Like/
GmbHLH56	Glyma13g39650	AT2G28160	r	AtbHLH029	Symbols: FIT1, ATBHLH029, FRU, BHLH029, ATBHLH29, ATFIT1	0	3e-68	46	LOC_Os04g31290	r	2e-31	40	OsbHLH156	0
GmbHLH57	Glyma12g30240	AT2G28160		AtbHLH029	Symbols: FIT1, ATBHLH029, FRU, BHLH029, ATBHLH29, ATFIT1	0	7e-76	48	LOC_Os04g31290		9e-30	40	OsbHLH156	0
GmbHLH58	Glyma12g08640	AT2G28160		AtbHLH029	Symbols: FIT1, ATBHLH029, FRU, BHLH029, ATBHLH29, ATFIT1	0	2e-51	41	LOC_Os04g31290		2e-19	35	OsbHLH156	0
GmbHLH59	Glyma11g19850	AT2G28160		AtbHLH029	Symbols: FIT1, ATBHLH029, FRU, BHLH029, ATBHLH29, ATFIT1	0	4e-65	46	LOC_Os04g31290		1e-21	35	OsbHLH156	0
GmbHLH6	Glyma03g04970	AT2G40435		#N/A	Symbols:	BEST Arabidopsis thaliana protein match is:	6e-40	53	LOC_Os07g47960		3e-45	59	OsbHLH163	0
GmbHLH60	Glyma19g33770	AT4G09820		AtbHLH042	Symbols: TT8, BHLH42	basic helix-loop-helix (bHLH) DNA-binding	3e-76	65	LOC_Os07g11020	r	2e-63	56	OsbHLH017	GL3-like/putative intensifier
GmbHLH61	Glyma03g30940	AT4G09820		AtbHLH042	Symbols: TT8, BHLH42	basic helix-loop-helix (bHLH) DNA-binding	2e-76	67	LOC_Os07g11020		3e-62	56	OsbHLH017	GL3-like/putative intensifier
GmbHLH62	Glyma02g16670	AT4G09820	r	AtbHLH042	Symbols: TT8, BHLH42	basic helix-loop-helix (bHLH) DNA-binding	e-135	48	LOC_Os04g47080		2e-69	30	OsbHLH013	EGL1-like/Ra(OSB1) *
GmbHLH63	Glyma05g37770	AT5G41315		AtbHLH001	Symbols: GL3, MYC6.2	basic helix-loop-helix (bHLH) DNA-binding	4e-64	40	LOC_Os04g47080	r	1e-80	32	OsbHLH013	EGL1-like/Ra(OSB1) *
GmbHLH64	Glyma08g01810	AT5G41315	r	AtbHLH001	Symbols: GL3, MYC6.2	basic helix-loop-helix (bHLH) DNA-binding	e-149	45	LOC_Os04g47080		2e-82	33	OsbHLH013	EGL1-like/Ra(OSB1) *
GmbHLH65	Glyma16g02690	AT1G01260	r	AtbHLH013	Symbols:	basic helix-loop-helix (bHLH) DNA-binding superfamily	8e-96	55	LOC_Os01g13460		1e-66	51	OsbHLH008	Myc7E-like/
GmbHLH66	Glyma07g06090	AT1G01260		AtbHLH013	Symbols:	basic helix-loop-helix (bHLH) DNA-binding superfamily	e-127	43	LOC_Os01g13460		5e-55	45	OsbHLH008	Myc7E-like/
GmbHLH67	Glyma19g44570	AT2G46510	r	AtbHLH017	Symbols: ATAIB, AIB	ABA-inducible BHLH-type transcription	e-130	46	LOC_Os01g13460	r	2e-57	45	OsbHLH008	Myc7E-like/
GmbHLH68	Glyma01g02250	AT4G17880		AtbHLH004	Symbols:	Basic helix-loop-helix (bHLH) DNA-binding family	2e-66	53	LOC_Os10g42430		6e-63	39	OsbHLH009	AtMYC2-like/OsMYC *
GmbHLH69	Glyma09g33730	AT4G17880		AtbHLH004	Symbols:	Basic helix-loop-helix (bHLH) DNA-binding family	e-125	44	LOC_Os10g42430		4e-64	46	OsbHLH009	AtMYC2-like/OsMYC *
GmbHLH7	Glyma01g32130	AT2G40435		#N/A	Symbols:	BEST Arabidopsis thaliana protein match is:	2e-33	56	LOC_Os07g47960		4e-44	58	OsbHLH163	0
GmbHLH70	Glyma01g12740	AT1G32640	r	AtbHLH006	Symbols: ATMYC2, RD22BP1, JAI1, JIN1, MYC2, ZBF1	Basic	e-162	52	LOC_Os10g42430	r	1.00 e-144	43	OsbHLH009	AtMYC2-like/OsMYC *
GmbHLH71	Glyma08g36720	AT4G17880		AtbHLH004	Symbols:	Basic helix-loop-helix (bHLH) DNA-binding family	e-146	49	LOC_Os10g42430		5e-73	50	OsbHLH009	AtMYC2-like/OsMYC *
GmbHLH72	Glyma13g18130	AT4G16430		AtbHLH003	Symbols:	basic helix-loop-helix (bHLH) DNA-binding superfamily	2e-87	52	LOC_Os01g13460		5e-42	53	OsbHLH008	Myc7E-like/
GmbHLH73	Glyma10g03950	AT4G16430	r	AtbHLH003	Symbols:	basic helix-loop-helix (bHLH) DNA-binding superfamily	e-126	47	LOC_Os01g50940	r	4e-63	36	OsbHLH010	AtbHLH017-like/
GmbHLH74	Glyma16g02320	AT4G00870		AtbHLH014	Symbols:	basic helix-loop-helix (bHLH) DNA-binding superfamily	2e-59	40	LOC_Os10g42430		9e-46	47	OsbHLH009	AtMYC2-like/OsMYC *
GmbHLH75	Glyma07g05740	AT4G00870	r	AtbHLH014	Symbols:	basic helix-loop-helix (bHLH) DNA-binding superfamily	5e-63	39	LOC_Os10g42430		2e-45	48	OsbHLH009	AtMYC2-like/OsMYC *
GmbHLH76	Glyma02g09670	AT4G00870		AtbHLH014	Symbols:	basic helix-loop-helix (bHLH) DNA-binding superfamily	8e-44	33	LOC_Os10g42430		4e-37	50	OsbHLH009	AtMYC2-like/OsMYC *
GmbHLH77	Glyma08g15740	AT3G19860	r	AtbHLH121	Symbols: bHLH121	basic helix-loop-helix (bHLH) DNA-binding	5e-62	54	LOC_Os02g23823		1e-54	48	OsbHLH064	AtbHLH121-like/
GmbHLH78	Glyma12g02740	AT3G19860		AtbHLH121	Symbols: bHLH121	basic helix-loop-helix (bHLH) DNA-binding	2e-51	47	LOC_Os02g23823		3e-43	46	OsbHLH064	AtbHLH121-like/
GmbHLH79	Glyma15g29630	AT3G19860		AtbHLH121	Symbols: bHLH121	basic helix-loop-helix (bHLH) DNA-binding	4e-61	53	LOC_Os02g23823		2e-52	46	OsbHLH064	AtbHLH121-like/
GmbHLH8	Glyma18g02560	AT2G40435		#N/A	Symbols:	BEST Arabidopsis thaliana protein match is:	8e-50	61	LOC_Os07g47960		1e-45	60	OsbHLH163	0
GmbHLH80	Glyma07g26910	AT3G19860		AtbHLH121	Symbols: bHLH121	basic helix-loop-helix (bHLH) DNA-binding	3e-53	47	LOC_Os02g23823	r	3e-59	50	OsbHLH064	AtbHLH121-like/
GmbHLH81	Glyma13g32470	AT5G54680		AtbHLH105	Symbols: ILR3, bHLH105	basic helix-loop-helix (bHLH)	1e-50	65	LOC_Os07g35870		5e-43	57	OsbHLH057	AtbHLH115-like/
GmbHLH82	Glyma15g06860	AT5G54680		AtbHLH105	Symbols: ILR3, bHLH105	basic helix-loop-helix (bHLH)	6e-58	53	LOC_Os07g35870		9e-49	57	OsbHLH057	AtbHLH115-like/
GmbHLH83	Glyma13g36260	AT5G54680		AtbHLH105	Symbols: ILR3, bHLH105	basic helix-loop-helix (bHLH)	1e-68	57	LOC_Os07g35870		1e-43	42	OsbHLH057	AtbHLH115-like/
GmbHLH84	Glyma12g34300	AT5G54680		AtbHLH105	Symbols: ILR3, bHLH105	basic helix-loop-helix (bHLH)	1e-71	60	LOC_Os07g35870		1e-48	44	OsbHLH057	AtbHLH115-like/
GmbHLH85	Glyma12g16560	AT5G54680		AtbHLH105	Symbols: ILR3, bHLH105	basic helix-loop-helix (bHLH)	7e-53	48	LOC_Os08g04390		1e-36	37	OsbHLH060	AtbHLH115-like/
GmbHLH86	Glyma06g41620	AT5G54680	r	AtbHLH105	Symbols: ILR3, bHLH105	basic helix-loop-helix (bHLH)	2e-69	58	LOC_Os08g04390		3e-49	45	OsbHLH060	AtbHLH115-like/
GmbHLH87	Glyma13g38140	AT1G51070		AtbHLH115	Symbols: bHLH115	basic helix-loop-helix (bHLH) DNA-binding	3e-50	47	LOC_Os08g04390		3e-45	44	OsbHLH060	AtbHLH115-like/
GmbHLH88	Glyma12g32280	AT1G51070		AtbHLH115	Symbols: bHLH115	basic helix-loop-helix (bHLH) DNA-binding	3e-25	45	LOC_Os05g38140		2e-23	45	OsbHLH058	AtbHLH115-like/
GmbHLH89	Glyma20g22010	AT4G14410	r	AtbHLH104	Symbols: bHLH104	basic helix-loop-helix (bHLH) DNA-binding	5e-43	53	LOC_Os07g35870		2e-22	33	OsbHLH057	AtbHLH115-like/
GmbHLH9	Glyma02g37310	AT1G72210		AtbHLH096	Symbols:	basic helix-loop-helix (bHLH) DNA-binding superfamily	6e-53	51	LOC_Os10g23050		2e-50	46	OsbHLH045	AtbHLH096-like/
GmbHLH90	Glyma10g01010	AT4G14410		AtbHLH104	Symbols: bHLH104	basic helix-loop-helix (bHLH) DNA-binding	2e-43	58	LOC_Os07g35870		9e-27	36	OsbHLH057	AtbHLH115-like/
GmbHLH91	Glyma17g06190	AT5G56960		AtbHLH041	Symbols:	basic helix-loop-helix (bHLH) DNA-binding family	9e-34	40	LOC_Os01g39330		8e-17	30	OsbHLH024	0
GmbHLH92	Glyma13g16480	AT5G56960		AtbHLH041	Symbols:	basic helix-loop-helix (bHLH) DNA-binding family	6e-27	36	LOC_Os01g09990		6e-13	47	OsbHLH025	0
GmbHLH93	Glyma15g18580	AT5G56960	r	AtbHLH041	Symbols:	basic helix-loop-helix (bHLH) DNA-binding family	4e-47	32	LOC_Os01g09990	r	5e-17	51	OsbHLH025	0
GmbHLH94	Glyma09g07390	AT5G56960		AtbHLH041	Symbols:	basic helix-loop-helix (bHLH) DNA-binding family	1e-50	35	LOC_Os01g39330	r	2e-19	34	OsbHLH024	0
GmbHLH95	Glyma02g00290	AT5G43650	r	AtbHLH092	Symbols: BHLH92	basic helix-loop-helix (bHLH) DNA-binding	5e-18	31	LOC_Os03g53020	r	6e-12	32	OsbHLH148	0
GmbHLH96	Glyma08g23060	AT2G22760		AtbHLH019	Symbols:	basic helix-loop-helix (bHLH) DNA-binding superfamily	6e-23	32	LOC_Os03g51580		4e-21	31	OsbHLH018	AtbHLH018-like/
GmbHLH97	Glyma07g03050	AT2G22750		AtbHLH018	Symbols:	basic helix-loop-helix (bHLH) DNA-binding superfamily	8e-24	37	LOC_Os03g51580		4e-24	32	OsbHLH018	AtbHLH018-like/
GmbHLH98	Glyma03g25100	AT4G37850		AtbHLH025	Symbols:	basic helix-loop-helix (bHLH) DNA-binding superfamily	2e-37	38	LOC_Os03g51580		1e-40	41	OsbHLH018	AtbHLH018-like/
GmbHLH99	Glyma07g13500	AT2G22760		AtbHLH019	Symbols:	basic helix-loop-helix (bHLH) DNA-binding superfamily	7e-34	44	LOC_Os03g51580		7e-36	45	OsbHLH018	AtbHLH018-like/
