# Supplementary material for: A Classification of Basic Helix-Loop-Helix Transcription Factors of Soybean
Source: Int J Genomics. 2015 Feb 11;2015:603182. doi: 10.1155/2015/603182 (PMC4339708; doi:10.1155/2015/603182)
Supplement: Supplementary file 1 — As Supplementary Material we have included the following. Addititional File 1: an Excel spreadsheet file that includes names and expression data for all of the soybean bHLH-encoding gene models. Additional File 2: A list of soybean gene models excluded from the analysis due to an incomplete bHLH domain or predicted in-frame stop codon. Additional File 3: A full-text alignment of all 319 soybean bHLH domains in pdf format. Additional File 4: a detailed phylogenetic tree of the soybean bHLH genes including full names and predicted family membership. Additional File 5: An Excel spreadsheet showing the presumptive rice and Arabidopsis orthologs of the soybean bHLH genes. Additional File 6: An Excel spreadsheet containing a list of bHLHs enriched for expression in seed or nodules. Additional File 7: The alignment of 319 soybean bHLH genes in PHYLIP format for computer analysis. Additional File 8: A LOGO illustration of the putative Motif 40. [file 603182.f1.zip › Supplementary Material/Additional File 6.xlsx]

## Sheet: Sheet1 (2)
Supplemental Table 6. Nodule and Seed enriched bHLH transcripts
Nodule Enriched bHLHs
Soybean GeneID	bHLH ID	nodule/total expression	AtBHLH ID	Annotation	Arabidopsis Gene	Glyma2.0
Glyma06g09670	GmbHLH36	0.904762	AtbHLH093	Symbols: bHLH093	AT5G65640	Glyma.06g092000
Glyma06g43560	GmbHLH136	0.818182	AtbHLH030	Symbols:	AT1G68810	Glyma.06g283300
Glyma09g27630	GmbHLH314	0.75	AtbHLH126	Symbols:	AT4G25410	Glyma.09g150000
Glyma04g09580	GmbHLH35	0.666667	AtbHLH093	Symbols: bHLH093	AT5G65640	Glyma.04g090100
Glyma15g06680	GmbHLH115	0.625	AtbHLH025	Symbols:	AT4G37850	Glyma.15g061400
						not found
						not found
						not found
						not found
Seed Enriched bHLHs:						not found
Soybean GeneID	bHLH ID	seed/total expression	AtBHLH ID	Annotation	Arabidopsis Gene	not found
Glyma02g00980	GmbHLH238	1	AtbHLH008	Symbols: PIF3, POC1, PAP3	AT1G09530	not found
Glyma02g11500	GmbHLH319	1	AtbHLH095	Symbols: RGE1, ZOU	AT1G49770	Glyma.02g103200
Glyma14g36010	GmbHLH142	0.960784	AtbHLH030	Symbols:	AT1G68810	Glyma.14g181500
Glyma13g05280	GmbHLH153	0.941176	At164PRE5	Symbols:	AT3G28857	Glyma.13g063800
Glyma05g23330	GmbHLH108	0.913043	AtbHLH025	Symbols:	AT4G37850	Glyma.05g110700
Glyma02g16670	GmbHLH62	0.895833	AtbHLH042	Symbols: TT8, BHLH42	AT4G09820	Glyma.02g147800
Glyma02g05970	GmbHLH180	0.882353	AtbHLH110	Symbols:	AT1G27660	not found
Glyma17g16730	GmbHLH107	0.866667	AtbHLH025	Symbols:	AT4G37850	Glyma.17g156000
Glyma07g13410	GmbHLH122	0.833333	AtbHLH025	Symbols:	AT4G37850	not found
Glyma02g37720	GmbHLH143	0.828125	AtbHLH032	Symbols: BHLH32, ATAIG1, TMO5	AT3G25710	Glyma.02g213800
Glyma10g40710	GmbHLH166	0.823529	AtbHLH113	Symbols:	AT3G19500	Glyma.10g261100
Glyma20g26630	GmbHLH165	0.8	AtbHLH113	Symbols:	AT3G19500	Glyma.20g130200
Glyma07g13420	GmbHLH123	0.777778	AtbHLH025	Symbols:	AT4G37850	not found
Glyma08g36590	GmbHLH22	0.75	AtbHLH096	Symbols:	AT1G72210	Glyma.08g271000
Glyma20g22280	GmbHLH222	0.714286	AtbHLH008	Symbols: PIF3, POC1, PAP3	AT1G09530	not found
