# Supplementary material for: A Classification of Basic Helix-Loop-Helix Transcription Factors of Soybean
Source: Int J Genomics. 2015 Feb 11;2015:603182. doi: 10.1155/2015/603182 (PMC4339708; doi:10.1155/2015/603182)
Supplement: Supplementary file 1 — As Supplementary Material we have included the following. Addititional File 1: an Excel spreadsheet file that includes names and expression data for all of the soybean bHLH-encoding gene models. Additional File 2: A list of soybean gene models excluded from the analysis due to an incomplete bHLH domain or predicted in-frame stop codon. Additional File 3: A full-text alignment of all 319 soybean bHLH domains in pdf format. Additional File 4: a detailed phylogenetic tree of the soybean bHLH genes including full names and predicted family membership. Additional File 5: An Excel spreadsheet showing the presumptive rice and Arabidopsis orthologs of the soybean bHLH genes. Additional File 6: An Excel spreadsheet containing a list of bHLHs enriched for expression in seed or nodules. Additional File 7: The alignment of 319 soybean bHLH genes in PHYLIP format for computer analysis. Additional File 8: A LOGO illustration of the putative Motif 40. [file 603182.f1.zip › Supplementary Material/Additional File 7_phylip.phy]

302 62
GmbHLH1 KATKHFATEKQRREQ-LNGKYKILRNLIP--SPTK-IDRASV---VGDAIDYIRELIRTVNE
GmbHLH2 KATKHFATEKQRREQ-LNGKYKILRNLIP--SPTK-TDRASV---VGDAIDYIRELIRTVNE
GmbHLH3 KQFTSTTTERQRRVD-LSSKFDALKELIP--NPSK-SDRASV---VGDAINYIRELKRTVEE
AtbHLH010 RKSRTSPTERERRVH-FNDRFFDLKNLIP--NPTK-IDRASI---VGEAIDYIKELLRTIEE
GmbHLH29 FKSKNLEVERRRREK-LSTRLLMLRSLVP--IITM-MNKATI---VEDAITYIETQQNIVQS
GmbHLH31 FKSKNLEVERRRREK-LSTRLLMMRSLVP--IITM-MNKATI---VEDAITYIKTQQNIEIK
GmbHLH30 FKSKNLEVERRRREK-LSTRILLLR-------FYS-MNKATI---VEDAITYIETQQNIVQS
GmbHLH32 YKSKNLETERRRREK-LSSRLLMLRSIVP--IITN-MNKAMI---VEDAITYIEKLQDKVQS
GmbHLH33 YKSKNLETERRRREK-LSSRLLMLRSMVP--IITN-MNKATI---VEDAITYIEKLQDKVQN
GmbHLH34 YKSKNLEIERRRREK-LSTRLLMLRSINP--IITN-MNRGTI---IVDAITYIEKLQHEVQR
GmbHLH35 QPSKNLMAERRRRKR-LNDRLSMLRAIVP--KISK-MDRTSI---LGDTIDYMKELLEKINN
GmbHLH37 QPSKNLMAERRRRKR-LNDRLSMLRSIVP--KISK-MDRTAI---LGDTIDYMKELLEKINN
GmbHLH38 QPSKNLMAERRRRKR-LNDRLSMLRSIVP--KISK-MDRTAI---LGDTIGYMKELLEKINN
GmbHLH39 QPSKNLMAERRRRKR-LNDRLSMLRSIVP--KISK-MDRTSI---LGDTIDYMKELLERIGK
AtbHLH061 QPSKNLMAERRRRKR-LNDRLSLLRSIVP--KITK-MDRTSI---LGDAIDYMKELLDKINK
GmbHLH42 LPAKNLMAERRRRKK-LNDRLYMLRSVVP--KISK-MDRASI---LGDAIDYLKELLQRIND
GmbHLH44 MPAKNLMAERRRRKK-LNDRLYMLRSVVP--KISK-MDRASI---LGDAIEYLKELLQRIND
GmbHLH46 IPAKNLMAERRRRKK-LNDRLYMLRSVVP--NISK-MDRASI---LGDAIEYLKELLQRISE
GmbHLH47 MPAKNLMAERRRRKK-LNDKLYMLRSVVP--NISK-MDRASI---LGDAIDYLRELQVRITD
GmbHLH48 NQSKNLVAERKRRKK-LNDRLYNLRSLVP--RISK-LDRASI---LGDAIEYVKDLQKQVKE
GmbHLH54 YQAKNLVTERNRRNK-IKKGLFTLRYLVP--RITK-MDRAAI---LADAVDHIKELQMQVRE
GmbHLH55 YQAKNLVTERNRRNK-IKKGLFTLRSLVP--RITK-MDRAAI---LADAVDHIKELQTQVRE
GmbHLH50 VASKNIVSERNRRKK-LNDRLFALRAVVP--NITK-MDKASI---IKDAIEYIQHLHDQEKR
GmbHLH51 VASKNIVSERNRRKK-LNDRLLALRAVVP--NITK-MDKASI---IKDAIEYIQHLHEQEKR
GmbHLH52 AASKNIVSERNRRKK-LNERLFALRSVVP--NISK-MDKASI---IKDAIDYIQHLHEQEKI
GmbHLH53 AASKNIVSERNRRKK-LNERLFALRSVVP--NISK-MDKASI---IKDAIEYIQHLHEQEKI
GmbHLH56 DRSKTLISERRRRGR-MKEKLYALRSLVP--NITK-MDKASI---IGDAVSYVHDLQAQARK
GmbHLH57 DMSKTLISERRRRGR-MKEKLYALRSLVP--NITK-MDKASI---IGDAASYVHDLQARARK
GmbHLH58 DRSKTLISERRRRDR-MKQKLYALWSLVP--NITK-MDKASI---IGDAVSYMHELQAQANM
GmbHLH59 DRSKTLASERRRRER-MKEKLYTLRSLVP--NITK-MDKASI---IGDAVSYMHELQAQASM
AtbHLH029 DRSRTLISERRRRGR-MKDKLYALRSLVP--NITK-MDKASI---VGDAVLYVQELQSQAKK
GmbHLH60 YETNHVMAERRRREK-LNERFLILRSMVP--FMMR-MDKESI---LEDTIHYIKQLREKIES
GmbHLH61 YETSHVMAERHRREK-LNERFLILRSMVP--SVTR-MDKASI---LGDTIEYIKQLRDKIES
GmbHLH62 LSANHVLAERRRREK-LNERFIILRSLVP--FVTK-MDKASI---LGDTIEYVKQLRRKIQE
GmbHLH63 NGMNHVMSERRRRAK-LNQRFLTLRSMVP--SISK-DDKVSI---LDDAIEYLKKLERRINE
GmbHLH64 NGMNHVMSERRRRAK-LNERFLTLRSMVP--SISK-DDKVSI---LDDAIDYLKKLERRVKE
GmbHLH65 EPLNHVEAERQRREK-LNQRFYALRAVVP--NISK-MDKASL---LGDAIAYINQLQAKLKT
GmbHLH66 EPLNHVEAERQRREK-LNQRFYALRAVVP--NISK-MDKASL---LGDAIAYINELQAKLKT
GmbHLH68 EPLNHVEAERQRREK-LNQRFYALRAVVP--NVSK-MDKASL---LGDAISYITELKSKLQT
GmbHLH67 APLNHVEAERQRREK-LNQRFYALRSVVP--NISK-MDKASL---LGDAIAYINELQAKVRI
GmbHLH70 EPLNHVEAERQRREK-LNQRFYALRAVVP--NVSK-MDKASL---LGDAISYINELKLKLNG
GmbHLH71 EPLNHVEAERQRREK-LNQRFYALRAVVP--NVSK-MDKASL---LGDAILYINELKSKLNV
GmbHLH72 EPLNHVEAERQRREK-LNQRFYALRAVVP--NISK-MDKASL---LGDAITFITDLQMKIKV
GmbHLH74 TPINHVEAERQRREK-LNHRFYALRAVVP--NVSR-MDKASL---LSDAVAYINELKAKIED
GmbHLH75 TPVNHVEAERQRREK-LNHRFYALRAVVP--NVSR-MDKASL---LSDAVAYISELKAKIEY
AtbHLH003 EALNHVEAERQRREK-LNQRFYALRAVVP--NISK-MDKASL---LADAITYITDMQKKIRV
GmbHLH76 LPMNHVEAERQRREK-LNQRFYTLRSAVP--NVSK-MDKASL---LLDAVDYINELKAKINH
GmbHLH96 ETLVHIMTERKRRRE-LTERFIALSATIP--GLKK-IDKATI---LSEAITHVKRLKERVRE
GmbHLH97 ETLDHIMTERKRRRE-LTERFIALSATIP--GLKK-IDKATI---LSEAITHVKRLKERVRE
GmbHLH98 EIKDHIMAERKRRQD-LTERFIALSATIP--GLKK-TDKAYI---LQEAITYMKQLQERVKV
GmbHLH99 TLNNHIMAERKRRRE-LTERFIALSATIP--GLKK-TDKAYI---LREAITYMKQLQERVKE
GmbHLH100 ESLDHIMSERNRRQE-LTSKFIALAATIP--GLKK-MDKAHV---LREAINYVKQLQERIEE
GmbHLH101 ESLNHIMSERNRRQE-LTSKFIALAATIP--GLKK-MDKAHV---LREAINYVKQLQERVEE
GmbHLH102 QTIDHIMAERRRRQE-LTERFIALSATIP--GLNK-TDKASV---LRAAIDYVKQLQERVQE
GmbHLH103 QTIDHIMAERRRRQD-LTERFIALSATIP--GLSK-TDKASV---LRAAIDYLKQLQERVQE
GmbHLH104 KRASHIMAERKRRQQ-LTQSFIALSATIP--GLNK-KDKSSM---LGKAIDYVKQLQERVTE
GmbHLH107 HTQDHIIAERMRREK-ISQKLIALSALIP--DLKK-MDKVSV---LGEAIRYVKQLKEQVKV
GmbHLH108 HTQDHIIAERMRREK-ISQQFIALSALIP--DLKK-MDKVSL---LGEAIRYVKQLKEQVKL
GmbHLH109 HAKDHIIAERMRREK-ISQQFVALSALIP--DLKK-MDKASV---LGDAIKHVKQLQEQVKL
GmbHLH110 QAQDHVIAERKRREK-LSQRFIALSAIVP--GLKK-MDKATV---LEDAIKYVKQLQERVKT
GmbHLH111 QAQDHVISERKRREK-LSQRFIALSAIIP--GLKK-MDKATV---LEDAIKYVKQLQERVKT
GmbHLH112 QAQEHVIAERKRREK-LSQRFIALSAILP--GLKK-MDKASV---LGDAIKYVKQLQERVQT
GmbHLH113 QAQEHIIAERKRREN-ISKRFIALSAILP--GLKK-MDKASV---LGDAVKYVKQLQERVQT
GmbHLH114 QPQDHIIAERKRREK-LSQRFIALSALVP--GLKK-MDKASV---LGEAIKYLKQMQEKVSA
GmbHLH116 QPQDHIIAERKRREK-LSQRFIALSALVP--GLQK-TDKASV---LGDAIKYLKQLQEKVNA
GmbHLH117 HAQDHIMAERKRREK-LSQSFIALAALVP--GLKK-MDKASV---LGDAIEYVKELKERLTV
GmbHLH118 HAQDHIMAERKRREK-LSQSFIALAALVP--GLKK-MDKASV---LGDAIKYVKELKERLTV
GmbHLH119 YARDHIIAERKRREK-LSQSLIALAALIP--GLKK-MDRASV---LGNAIKYVKELQERLRM
GmbHLH120 HVRDHIIAERKRREK-LSQSLIALAALIP--GLKK-MDKASV---LGDAIKYVKELQERMRM
AtbHLH025 NAQDHIIAERKRREK-LTQRFVALSALVP--GLKK-MDKASV---LGDALKHIKYLQERVGE
GmbHLH121 QTLDHILAERKRREN-ISRMFIALSALIP--DLKK-MDKASV---LSNAIEYVKYLQQHVKD
GmbHLH122 TSFDHIMAERKRREN-ISRLFIALSALIP--GLKK-MDKASV---LYNAIEHVKYLQQRVKD
GmbHLH123 EIQDHIMSERKRREN-IAKLFIALSAVIP--VLKK-TDKASV---LKTAIDYVKYLQKRVKD
GmbHLH105 -FSGMGETDRKKRKRELAERFLALSATIP--GFTK-TDKTSI---LANASSYVKQLQQRVRE
GmbHLH106 -FSGMGETDRKKRQRELTERFLALSATIP--GFKK-TDKTSI---LANASSYVKQLQQRVRE
GmbHLH124 AAKKHSEAEKRRRMR-INGQYETLRNILP--NIIK-KDKASV---LAETIKQVKELKKKVSK
GmbHLH126 AMKNHKEAEKRRRER-INSHLDHLRTLLP--CNSK-TDKASL---LAKVVQRVKELKQQTSE
GmbHLH127 AMKNHKEAEKRRRER-INSHLDQLRTLLP--CNSK-TDKASL---LAKVVQRVKELKQQTSE
GmbHLH128 ALRNHKEAEKRRRER-INSHLDKLRTLLP--CNSK-TDKASL---LAKVVQRVRELKQQISS
GmbHLH129 ASKSHSEAERRRRER-INNHLAKLRSLLP--STTK-TDKASL---LAEVIQHVKELKRQTSL
GmbHLH130 ASKSHSEAERRRRER-INNHLAKLRSLLP--STTK-TDKASL---LAEVIQHVKELKRQTSV
GmbHLH131 ASKSHSEAERRRRER-INNHLAKLRSLLP--NTTK-TDKASL---LAEVIQHVKELKRQTSL
GmbHLH132 ASKSHSEAERRRRER-INNHLAKLRSLLP--NTTK-TDKASL---LAEVIQQVKELKRQTSL
AtbHLH030 ASKSHSEAERRRRER-INNHLAKLRSILP--NTTK-TDKASL---LAEVIQHVKELKRETSV
GmbHLH142 ACKSHREAERRRRQR-INSHLSTLRSLLP--NAAK-SDKASL---LGEVVEHVKRLRKQADD
GmbHLH143 ACKSHREAERRRRQR-INSHLSTLRTLLP--NAAK-SDKASL---LGEVVEHVKRLRKQADD
GmbHLH133 ALKNHSEAERRRRER-INGHLATLRGLVP--STEK-MDKATL---LAEVISQVKELKKNAAE
GmbHLH134 ALKNHSEAERRRRER-INAHLATLRGLVP--STEK-MDKATL---LAEVISQVKELKKNAME
GmbHLH135 ALKSHSEAERKRRAR-INAHLDTLRSVIP--GAMK-MDKASL---LGEVIRHLKELKKNAAQ
GmbHLH137 ALKNHSEAERRRRAR-INAHLDTLRSVIP--GAKK-LDKATL---LGEVIRHLKELKTNATQ
GmbHLH138 ASKSHSQAEKRRRDR-INAQLATLRKLIP--KSDK-MDKAAL---LGSVIDQVKDLKRKAMD
GmbHLH139 ASKSHRQAEKRRRDR-INAQLATLRKLIP--KSDK-MDKAAL---LGSVIDQVKDLKRKAMD
GmbHLH140 ASKSHSQAEKRRRDS-INAQLATLRKLIP--MSDK-MDKATL---LGSVVDHVKDLKRKAMD
GmbHLH141 ASKSHSQAEKRRRDR-INAQLATLRKLIP--MSDK-MDKAAL---LGSVVDHVKDLKRKAMD
GmbHLH185 AADPQSLYARKRRER-INERLRILQNLVP--NGTK-VDISTM---LEEAVQYVKFLQLQIKL
GmbHLH186 ATDPQSLYARKRRER-INERLRILQNLVP--NGTK-VDISTM---LEEAVQYVKFLQLQIKL
GmbHLH187 ATDPQSLYARKRRER-INERLRILQNLVP--NGTK-VDISTM---LEEAVNYVKFLQLQIKL
GmbHLH189 ATDPQSLYARKRRER-IDDRLRILQNLVP--NGTK-VDISTM---LEEAVQYVKFLQLQNKL
AtbHLH084 ATDPQSLYARKRRER-INERLRILQHLVP--NGTK-VDISTM---LEEAVQYVKFLQLQIKL
GmbHLH190 ATDPQSVYARRRRER-INERLRILQHLVP--NGTK-VDISTM---LEEAVKYVKFLQLQIK-
AtbHLH054 ATDPQSLYARKRREK-INERLKTLQNLVP--NGTK-VDISTM---LEEAVHYVKFLQLQIKL
GmbHLH191 SKDPQSVAAKNRRER-ISERLKILQELVP--NGSK-VDLVTM---LEKAISYVKFLQLQVKV
GmbHLH194 SQDPQSVAAKNRRER-ISERLKILQELVP--NGSK-VDLVTM---LEKAISYVKFLQLQVKV
GmbHLH193 FKDPQSVAAKNRRER-ISERLKILQELVP--NGSK-VDLVTM---LEKAISYVKFLQLQVKV
AtbHLH086 PKDPQSLAAKNRRER-ISERLKVLQELVP--NGTK-VDLVTM---LEKAIGYVKFLQVQVKV
GmbHLH195 STDPQSVAARERRHR-ISDRFKILQSMVP--GGSK-MDTVSM---LEGAIHYVKFLKTQILL
GmbHLH196 STDPQSVAARERRHR-ISDRFKILQSMVP--GGSK-MDTVSM---LECAIHYVKFLQTEILL
GmbHLH197 STDPQSVAARERRHR-ISDRFKILQSMVP--GGSK-MDTVSM---LEEAIQYVKFLKTQIWL
GmbHLH198 STDQQSVAARERRHR-ISDRFKILQSMVP--GGSK-MDTVSM---LEEAIQYVKFLKTQIWL
AtbHLH140 STDPQSVAARDRRHR-ISDRFKILQSMVP--GGAK-MDTVSM---LDEAISYVKFLKAQIWY
GmbHLH199 SKDPQSVAARHRRER-ISERIRILQRLVP--GGTK-MDTASM---LDEAIHYVKFLKKQVQT
GmbHLH203 SKDPQSVAARHRRER-ISERIRILQRLVP--GGTK-MDTASM---LDEAIHYVKFLKTQVQS
GmbHLH205 SDDPQSVAARHRRER-ISEKIRILQRLVP--GGTK-MDTASM---LDEAIRYVKFLKRQIRL
GmbHLH207 SDDPQSVAARHRRER-ISEKIRILQRLVP--GGTK-MDTASM---LDEAIRYVKFLKRQI--
GmbHLH208 SDDPQSVAARHRRER-ISEKIRILQRLVP--GGTK-MDTASM---LDEAILYVKFLKRQI--
GmbHLH209 SSDPQTVAARQRRER-ISERIRVLQKIVP--GGSK-MDTASM---LDEAANYLKFLRSQVKA
GmbHLH210 STDPQTVAARQRRER-ISERIRVLQKIVP--GGSK-MDTASM---LDEAANYLKFLRSQVKA
GmbHLH211 STDPQTVAARHRRER-ISEKIRVLQKLVP--GGSK-MDTASM---LDEAANYLKFLRSQVKA
GmbHLH212 STDPQTVAARHRRER-INEKIRVLQKLVP--GGSK-MDTASM---LDEAANYLKFLRSQVKA
GmbHLH254 ATDPHSIAERLRRER-IAERIRALQELVP--SVNK-TDRAAM---LDEIVDYVKFLRLQVKV
GmbHLH257 ATDPHSIAERLRRER-IAERIRALQELVP--SVNK-TDRAAM---LDEIVDYVKFLRLQVKG
GmbHLH258 ATDPHSIAERLRRER-IAERMKALQELVP--SINK-TDRAAM---LDEIVDYVKFLRLQVKV
GmbHLH260 ATDPHSIAERLRRER-IAERMKALQELVP--NANK-TDKASM---LDEIIDYVKFLQLQVKV
AtbHLH066 ATDPHSIAERLRRER-IAERMKALQELVP--NGNK-TDKASM---LDEIIDYVKFLQLQVKV
GmbHLH216 NSVVHNQSERRRRDK-INQRMKELQKLVP--NSSK-TDKASM---LDEVIQYMKQLQAQVQM
GmbHLH217 NSVVHKQSERRRRDK-INQRMKELQKLVP--NSSK-TDKASM---LDEVIQYMKQLQAQVQM
GmbHLH218 AAAIHNQSERKRRDK-INQRMKTLQKLVP--NSSK-TDKASM---LDEVIEYLKQLQAQVQM
GmbHLH219 AAAIHNQSERKRRDK-INQRMKTLQKLVP--NSSK-SDKASM---LDEVIEYLKQLQAQLQM
GmbHLH220 SAEVHNLSERRRRDR-INEKMRALQELIP--NCNK-ADKASM---LDEAIEYLKTLQLQLQ-
GmbHLH221 SAEVHNLSERRRRDR-IDEKMRALQELIP--NCNK-ADKASM---LDEAIEYLETLQLQLQI
GmbHLH222 AAEVHNLSERRRRDR-INEKMRALQELIP--NCNK-VDKASM---LDEAIEYLKTLQLQVQI
GmbHLH223 AAEVHNLSERKRRDR-INEKMRALQELIP--NCNK-VDKASM---LDEAIEYLKTLQLQVQI
GmbHLH224 AAEVHNLSERRRRDR-INEKMKALQELIP--RCNK-SDKASM---LDEAIEYLKSLQLQVQM
GmbHLH226 AAEVHNLSERRRRDR-INEKMKALQELIP--RCNK-SDKASM---LDEAISYLKSLQLQVQM
AtbHLH008 SAEVHNLSERRRRDR-INEKMRALQELIP--NCNK-VDKASM---LDEAIEYLKSLQLQVQI
GmbHLH232 AAEVHNLSERRRRDR-INEKMKALQQLIP--HSSK-TDKASM---LEEAIEYLKSLQLQLQL
GmbHLH234 AAEVHNQSERRRRDR-INEKMRTLQQLIP--NSNK-TDKASM---LEEAIEYLKSLQFQLQV
GmbHLH227 AAEVHNLSEKRRRGR-INEKMKALQNLIP--NSNK-TDKASM---LDEAIEYLKQLQLQVQM
GmbHLH228 AAEVHNLSEKRRRSR-INEKMKALQNLIP--NSNK-TDKASM---LDEAIEYLKQLQLQVQM
GmbHLH229 AAEFHNLSEKRRRSR-INEKMKALQNLIP--NSNK-TDKASM---LDEAIEYLKQLQLQVQ-
GmbHLH230 AAEFHNLSEKRRRSR-INEKMKALQNLIP--NSNK-TDKASM---LDEAIEYLKQLQLQVQY
GmbHLH231 AAEVHNLSEKRRRSR-INEKLKALQNLIP--NSNK-TDKASM---LDEAIEYLKQLHLKVQM
GmbHLH236 NPEVHNLSEKKRREK-INKKMRTLKDLIP--NCNK-VDKASM---LDDAIDYLKTLKLQLQI
GmbHLH237 NPVVHNLSEKKRREK-INKKMRTLKELIP--NCNK-VDKASM---LDDAIDYLKTLKLQLQI
GmbHLH238 NAQVHNLCERKRRDK-INKRMRILKELIP--NCNK-TDKASM---LDDAIEYLKTLKLQIQ-
GmbHLH239 NAEVHNLCERKRRDK-INKRMRILKELIP--NCNK-TDKASM---LDDAIEYLKTLKLQLQM
GmbHLH263 ATDSHNLAERVRRGK-INEKLRYLQNIVP--GCYKTMSMAVM---LDEIINYVQSLQHQVEF
GmbHLH264 ATDSRNLAERVRRGK-INEKLRYLQNIVP--GCYKTMGMAVM---LDEIINYVQSLQNQVEF
GmbHLH265 ATDSHSLAERVRRGK-INEKLRCLQNIVP--GCYKTMGMAIM---LDEIINYVQSLQHQVEF
GmbHLH267 ATDSHSLAERVRRGK-INEKLRCLQNIVP--GCYKTMGMAVM---LDEIINYVQSLQHQVEF
GmbHLH269 ATNSHNLAERVRREK-ISERMRLLQELVP--GCEKITGKAVM---LDEIINYVQLLQQQVEF
GmbHLH271 ATNSHSLAERVRREK-ISERMRLLQELVP--GCNKITGKAVM---LDEIINYVQSLQQQVEF
GmbHLH272 ATNSHSLAERVRREK-ISERMRLLQELVP--GCDKKTGKAVM---LDEIINYVQSLQQQVEL
GmbHLH280 ATDSHSLAERARREK-ISERMKILQDLVP--GCNKVIGKALV---LDEIINYIQSLQRQVEF
GmbHLH285 ATDSHSLAERARREK-ISERMKILQDIVP--GCNKVIGKALV---LDEIINYIQSLQRQVEF
GmbHLH284 ATDSHSLAERARREK-ISERMKILQDIVP--GCNKVIGKALV---LDEIINYIQSLQHQVEF
GmbHLH287 ATDNHSLAERARREK-ISERMKILQDLVP--GCNKVIGKAFV---LDEIINYVQSLQRQVEF
GmbHLH286 ATDSHSLAERARREK-ISERMKTLQDLVP--GCNKVIGKALV---LDEIINYIQSLQRQAEF
GmbHLH288 ATDSHSLAERVRREK-ISERMKYLQDLIP--GCNKVAGKAGM---LDEIINYVQSLQRQVEF
GmbHLH289 ATDSHSLAERVRREK-ISERMKYLQDLVP--GCNKVAGKAGM---LDEIINYVQSLQRQVEF
GmbHLH291 ATDSHSLAERVRREK-ISERMKYLQDLVP--GCNKVTGKAGM---LDEIINYVQSLQRQVEF
GmbHLH290 ATDSHSLAERVRREK-ISERMNYLQDLVP--GCNKVTGKAGM---LDEIINYVQSLQRQVEF
GmbHLH294 ATDSHSLAERVRREK-ISERMKLLQDLVP--GCNKVTGKALM---LDEIINYVQSLQRQVEF
GmbHLH292 ATNSHSLAERVRREK-ISERMKFLQDLVP--GCSKVTGKAVM---LDEIINYVQSLQRQVEF
GmbHLH276 ATDSHSLAERVRREK-ISERMKTLQRLVP--GCDKVTGKALV---LDEIINYVQSLQNQVEF
GmbHLH278 ATDSHSLAERVRREK-ISERMKVLQRLVP--GCDKVTGKALM---LDEIINYVQSLQNQVEF
GmbHLH277 ATDSHSLAERVRREK-ISKRMTTLQRLVP--GCDKVTGKALV---LDEIINYVQSLQNQVEF
AtbHLH078 ATDSHSLAERVRREK-IGERMKLLQDLVP--GCNKVTGKALM---LDEIINYVQSLQRQVEF
GmbHLH273 ATDSHSLAERARREK-INARMKLLQELVP--GCDKISGTAMV---LDEIINHVQSLQRQVEF
GmbHLH275 ATDSHSLAERARREK-INARMKLLQELVP--GCNKISGTALV---LDKIINHVQSLQNEVEI
GmbHLH270 APKENFI--HVRREK-ISERMRLLQELVP--GCNKITGKAVM---LDEIINYVQSLQQQVES
GmbHLH240 ATHPRSIAERVRRSR-ISERIRKLQELVP--NMDKQTSTAEM---LDLAVDYIKDLQKEFKT
GmbHLH241 ATHPRSIAERVRRTR-ISERIRKLQELVP--TMDKQTSTAEM---LDLALDYIKDLQKQFKT
GmbHLH242 ATHPRSIAERVRRTR-ISERMRKLQELVP--HMDKQTNTADM---LDLAVEYIKDLQKQFKT
GmbHLH243 ATHPRSIAERVRRTR-ISERMRKLQELVP--NMDKQTNTADM---LDLAVEYIKDLQKQFKT
GmbHLH244 ATHPRSIAERVRRTK-ISERMRKLQDLVP--NMDKQTNTADM---LDLAVDYIKDLQKQVQT
GmbHLH246 ATHPRSIAERVRRTK-ISERMRKLQDLVP--NMDKQTNTADM---LDLAVEYIKDLQNQVQT
GmbHLH247 ATHPRSIAERVRRTK-ISERMRKLQDLVP--NMDKQTNTADM---LDLAVEYIKDLQNQVEA
GmbHLH248 ATHPRSIAERVRRTR-ISDRIRKLQELVP--NMDKQTNTADM---LDEAVAYVKFLQKQIEE
GmbHLH249 ATHPRSIAERERRTR-ISERIKKLQDLFP--RSEKPTSTADM---LDLAVEHIKDLQQQVQI
GmbHLH250 ATHPRSIAERVRRTR-ISERIKKLQDLFP--KSEKQTSTADM---LDLAVEYIKDLQQKVKI
GmbHLH251 ATHPRSIAERERRTR-ISARIKKLQDLFP--KSDKQTSTADM---LDLAVEYIKDLQKQVKI
GmbHLH252 ATHPRSIAERERRTR-ISARIKKLQDLFP--KTDKQTSTADM---LDLAVEYIKDLQKQVKM
GmbHLH253 ATHPRSIAERERRTR-ISGKLKKLQDLVP--NMDKQTSYADM---LDLAVQHIKGLQTQVQK
AtbHLH128 ATHPRSIAERERRTR-ISGKLKKLQDLVP--NMDKQTSYSDM---LDLAVQHIKGLQHQLQN
AtbHLH026 SVTRKGSKRRRRDEK-MSNKMRKLQQLVP--NCHK-TDKVSV---LDKTIEYMKNLQLQLQM
GmbHLH213 IISPQSVAARERRRK-ITEKTQQLGNLIP--GGPK-MNTAEM---LHAAAKYVKFLQAQ---
GmbHLH214 -TKRPISPPRERRRK-ITEKTQELGKLVP--GGPK-MNTAEM---LHAAAKYVKFLQAQVGM
GmbHLH91 QYQQHTISERRRREK-LNENFQALRTLLP--PGTK-KNKATI---LTTATETMRSLMDEIEK
GmbHLH92 HQQHHMITERRRREK-LNESFQALRALLP--PGTK-KAKGTI---LTTAKDTMRSLMDEIEK
GmbHLH93 TQLHHMISERRRREK-LNENFQALRALLP--PGTK-KDKASI---LIAAKETLRSLMAEVDK
GmbHLH94 TQLHHMISERRRREK-LNENFQSLRALLP--PGTK-KDKASI---LIAAKETLSSLMAEVDK
AtbHLH041 TQLQHMISERKRREK-LNESFQALRSLLP--PGTK-KDKASV---LSIAREQLSSLQGEISK
GmbHLH298 KKLSHNASERDRRKK-INNLVSSLRSLLP--VADQ-TKKMSIPATVSRVIKYIPELQQQVQS
GmbHLH299 KKLSHNASERDRRKK-VNHLVSSLRSLLP--VADQ-TKKMSIPTTVSRVIKYIPELQQQVEA
GmbHLH300 KKLSHNASERDRRKK-VNDLVSSLRSLLP--GPDQ-TKKMSIPATVSRVLKYIPELQHQVQA
AtbHLH100 KKLNHNASERERRKK-INTMFSSLRSCLP--PTNQ-TKKLSVSATVSQALKYIPELQEQVKK
GmbHLH305 SRTDRKFIEQNRRNH-LKDLFFKLNSVVP--HQSS-REAISRPDQIGEATNYIKNLQIKLEK
GmbHLH306 SRTDTKSIEQNRRNQ-MKDLFSKLNSVVP--HQSS-RDATSRPDKIGEATNYIKNLQIKLEK
GmbHLH307 SRVERKIIERNRRNQ-MKALFRELNSLVP--HQSS-KEAISLPDQLEEATNYIKKLQINLEK
GmbHLH308 TKVERRLVEKNRRNQ-MKNLYNKLNSLLP--SYNP-KEALPLPDQVDEAINYIKSLEAKVKM
GmbHLH309 TKVERRLVEKNRRNQ-MKILCNKLNSLLP--SYNP-KEALPLPDQVDEAINYIKSLEAKVKM
GmbHLH310 TKVERKIVEKNRRSQ-MKNLYSELNSLLP--TRNP-KEAMSLPDQIDEAINYIKSLETKVKL
GmbHLH311 KKMVHREIEKQRRQE-MATLHASLRSLLP--LDFI-KGKRSISDQMNEAVNYINHLQKNIKE
GmbHLH312 KKMVHREIERQRRQE-MATLHASLRSLLP--LRFI-KGKRSISDQMNEAVNYINHLQKNIKE
GmbHLH313 KKMIHMEIERKRRQE-MATFYASLRSLLP--LEFI-KGKRSISDHMNEAANYIKHMQNNIKE
GmbHLH314 KKMIHKEIERQRRQE-MATFYASLRSLLP--LEFI-KGKRSISDHMNEAVNYIKHMQKHIKE
GmbHLH315 KKWMHKETERQRRQE-MGNLCTTLRSLLP--LEYI-KGKRSTSDHVNEAMNYINHLQSKVKQ
GmbHLH316 KKWMHKETERQRRQE-MGKLCATLRSLLP--LEYI-KGKRSTSDYVNEAMNYINHLQNKVKQ
GmbHLH317 KKWMHRETEKQRRQE-MTRLCTNFRSLLP--LEYI-KGKRSISDHMHEGTNYIKYLQNKVKQ
AtbHLH126 KKLLHRDIERQRRQE-MATLFATLRTHLP--LKYI-KGKRAVSDHVNGAVNFIKDTEARIKE
GmbHLH318 KKIIRREVEKQRRTN-MSILCASLRSSLP--FELI-KGKRSASDHIGEAVNYIQILKQKINA
GmbHLH144 QRSKHSETEQR-----FEWKFQVLRDLIP--QNDQKRDKASF---LLEVIEYIQFLQEKLQI
GmbHLH145 HRSKHSETEQRRRSK-INERFQVLRDLIP--QNDQKRDKASF---LLEVIEYIQFLQEKIQI
GmbHLH146 PRSKHSATEQRRRSK-INDRFQMLRELIP--HSDQKRDKASF---LLEVVEYIHFLQEKVHK
GmbHLH147 PRSKHSATEQRRRSK-INDRFQMLRELIP--HSDQKRDKASF---LLEVIEYIHFLQEKVHK
GmbHLH148 IRSKHSVTEQRRRSK-INERFQILRDLIP--HSDQKRDTASF---LLEVIEYVQYLQEKVQK
GmbHLH149 IRSKHSVTEQRRRSK-INERFQILRDLIP--HSDQKRDTASF---LLEVMEYVQYLQEKVQK
AtbHLH141 CRSKHSETEQRRRSK-INERFQSLMDIIPQNQNDQKRDKASF---LLEVIEYIHFLQEKVHM
GmbHLH9 QRMTHIAVERNRRKQ-MNEYLAVLRSLMPPSYVQR-GDQASI---IGGTINFVKELEQLLQC
GmbHLH10 QRMTHIAVERNRRKQ-MNEYLAVLRSLMPPSYVQR-GDQASI---IGGAINFVKELEQLLQC
GmbHLH11 QRRTHIAVERNRRKQ-MNEYLAVLRSLMPSSYVQR-GDQASI---IGGAINFVKELEQLLQS
GmbHLH12 QRMTHIAVERNRRKQ-MNEYLAVLRSLMPSSYVQR-GDQASI---IGGAINFVKELEQLLQS
GmbHLH17 QRMTHIAVERNRRKQ-MNEYLSVLRSLMPESYVQR-GDQASI---IGGAINFVKELEQRLQF
GmbHLH19 QRMTHIAVERNRRKQ-MNEYLSVLRSLMPDSYIQR-GDQASI---IGGAINFVKELEQRMHF
GmbHLH20 QRMTHIVVERNRRKQ-MNEYLSVLRSLMPDSYIQR-GDQASI---IGGAVNFVKELEQRLHF
GmbHLH15 QRMTHIAVERNRRRQ-MNDHLSVLRSLMPPSYIQR-GDQASI---IGGAIDFVKELEQLLQS
GmbHLH13 QRMTHIAVERNRRKQ-MNEHLRVLRSLMPGSYVQR-GDQASI---IGGAIEFVRELEQLLQC
GmbHLH21 QRITHITVERNRRKQ-MNEHLVVLRSLMPESYVQR-GDQASI---VGGAIEFVKELEHLLQS
GmbHLH22 QRITHITVERNRRKQ-MNEHLAVLRSLMPESYVQR-GDQASI---VGGAIEFVKELEHLLQS
AtbHLH096 QRMTHIAVERNRRKQ-MNEYLAVLRSLMPPYYAQR-GDQASI---VGGAINYLKELEHHLQS
GmbHLH23 --MSHIAVERNRRRQ-MNEHLKVLRSLTPCFYIKR-GDQASI---IGGVIEFIKELHQVLQA
GmbHLH24 --MSHIAVERNRRRQ-MNEHLKVLRSLTPCFYIKR-GDQASI---IGGVIEFIKELHQVRQA
GmbHLH25 -KVSHITVERNRRKE-MNENLSILRSLMPFFYVKR-GDQASI---IGGVIDYINELQQLLQC
GmbHLH26 QKVSHITVERNRRKQ-MNENLLVLRSLMPSFYVKR-GDQASI---IGGVVDYINEMQQLLQC
GmbHLH27 QKMSHITVERNRRKQ-MNEHLTVLRSLMPCFYVKR-GDQASI---IGGVVDYISELQQVLQA
GmbHLH215 PVIPQSSLARQRRQK-LSEKTRYLQKLMP--WDKK-MDQATL---LEEAYKYVKFLQAQSRV
AtbHLH117 PTASNDGGIITKRRK-ISDKIRSLEKLMP--WERK-MNLAMT---LEESHKYIKFLQSQIAS
GmbHLH165 ENPTSTGHAK-RKEK-LGERIAALQQLVS--PFSK-TDTASV---LHEAMGYIRFLHDQVQV
GmbHLH166 ENPTSTGHAK-RKEK-LGERIATLQQLVS--PFGK-TDTASV---LHEAMGYIRFLHDQVQV
GmbHLH167 ETPSPLPTFKVRKEK-LGDRITALQQLVS--PFGK-TDTASV---LHEAIEYIKFLHDQVLR
GmbHLH168 ETPSPLPTFKVRKEK-LGDRITALQQLVS--PFGK-TDTASV---LHEAIEYIKFLHDQVSV
GmbHLH169 ESPSPLPAFKVRKEK-MGDRITALQQLVS--PFGK-TDTASV---LSEAIEYIKFLHEQVTA
GmbHLH170 ETPSPLPAFKVRKEK-MGDRITALQQLVS--PFGK-TDTASV---LSEAIEYIKFLHEQVTA
GmbHLH171 ETPSPLPAFKVRKEK-MGDRITALQQLVS--PFGK-TDTASV---LSEAIEYIKFLHEQVTV
GmbHLH173 QPSSSQPPLKVRKEK-LGDRITALHQLVS--PFGK-TDTASV---LLEAIGYIRFLQGQIEA
GmbHLH175 QPSSSQAPLKVRKEK-LGDRITTLHQLVS--PFGK-TDTASV---LLEAIGYIRFLQGQIEA
GmbHLH176 QPPTTQSTFKVRKEK-LGDRITALHQLVS--PFGK-TDTASV---LLEAIGYIRFLQSQIEA
GmbHLH177 QPPTTQSTFKVRKEK-LGDRITALHQLVS--PFGK-TDTASV---LLEAIGYIRFLQSQIEV
GmbHLH178 PSATTQTTFKVRKEK-LGERITALHQLVS--PFGK-TDTASV---LLEAIGYIRFLQSQIEA
AtbHLH110 ESRSSCPPFKVRKEK-LGDRIAALQQLVS--PFGK-TDTASV---LMEAIGYIKFLQSQIET
GmbHLH179 KSRPSCPPLKVRKEK-LGDRIQTLQRLVA--PFGK-TSTASV---LSEAIGYIHFLHQQIQT
GmbHLH180 KSRPSCPPLKVRKEK-LGDRIQTLQRLVA--PFGK-TSTAYV---LSEAIGYIHFLHQQIQT
GmbHLH181 TSTASSSKVQAPKVK-LGDKITALQQIVS--PFGK-TDTASV---LFEAIGYIKFLQEQVQL
GmbHLH183 QKADLSISTKERKEK-IGERIVALQQLVS--PYGK-TDTSSV---LKEAMEYIGFLHKQVKL
GmbHLH184 QKADLSISTKERKEK-IGKRIVALQQLVS--PYGK-TDTSSV---LKEAMEYIGFLHKQVKL
GmbHLH319 DHEMHIWTERERRKK-MRNMFASLHALLP--HLPSKADKSTV---VDEAVAYIKNLEKTLE-
AtbHLH095 DHEIHIWTERERRKK-MRDMFSKLHALLP--QLPPKADKSTI---VDEAVSSIKSLEQTLQK
GmbHLH77 RKTQKADREKLRRDR-LNEQFVELGNILDPDRP-K-NDKATI---IGDTIQLLKDLTSQVSK
GmbHLH78 RKTQKADREKLRRDR-FNVQFVELGNILDPDRP-K-NDKATI---LGDTIQLLKDLTSEVSK
GmbHLH79 RKTQKADREKLRRDR-INEQFVELGNILDPDRP-K-NDKATI---LCDTIQLLKDLISQVSK
GmbHLH80 RKVLKADREKLRRDR-LNEHFQELGNALDPDRP-K-NDKATI---LTETVQMLKDLTAEVNR
AtbHLH121 RKSQKAGREKLRREK-LNEHFVELGNVLDPERP-K-NDKATI---LTDTVQLLKELTSEVNK
GmbHLH81 SSDSKACREKMRRDR-LNDRFMELWSIVGPGMPLK-MDKAVI---LSDAVRVVSQLQEEAQK
GmbHLH82 PSDSKACREKMRRDR-LNDRFMELGSILDPRKPLK-MDKAVI---LSDAVRVVSQLREEAQK
GmbHLH83 ASSSKACREKLRRDR-LNDKFVELGSILEPGRPPK-TDKASI---LIDAARMVTQLRDEALK
GmbHLH84 ASSSKACREKLRRDR-LNDKFVELGSILEPGRPPK-TDKAAI---LIDAARMVTQLRDEALK
GmbHLH85 ASSSKACREKLRRDR-LNDKFVELGSILEPGRPAK-TDKTAI---LIDAVRMVTQLRGEAQK
GmbHLH86 ASGSKACREKLRRDR-LNDKFVELGAILEPGRPAK-TDKAAI---LIDAVRMVTQLRGEAQK
GmbHLH87 ASGSKACREKLRRDK-LNERFLELSSILEPSRQPK-SDKVAI---LSDAARVVIQLRNEAKR
GmbHLH88 ASGSKACREKLRRDK-LNERFLELSSILEPGRQPK-TDKVAL---LSDAARVVIQLRNEAER
GmbHLH89 KAGSKACREKLRRER-LNERFCDLSSVLEPGRPVR-TDKPAI---LDDAIRVLSQLKTEAQE
GmbHLH90 QVGSKACREKLRRER-LNERFCDLSSVLEPGRPVR-TDKPAI---LDDAIRVLSQLKTEAQE
AtbHLH115 GSNSKACREKQRRDR-LNDKFTELSSVLEPGRTPK-TDKVAI---INDAIRMVNQARDEAQK
GmbHLH95 RSFRHMINERMRRQR-QRQCCLALHSILP--QGTK-TDNNSV---IQMAAKEIVRLQGCREE
GmbHLH301 SKLDRKTIEKNRRIH-MKSLCHQLSSLIPPN-----LKPAKSKDQLDLAARYIKHMNERIEK
GmbHLH302 SKLDRKTIERNRRTH-MKSLCHQLSSLIPPN-----LKPVKPKDQLDLAARYIRQMTERVEK
GmbHLH303 PKLDRKTIERNRRIH-MKSLCFKLVSTIPSNYLKTSKDMLSQQDQLHLAATYIKHLRERIEK
GmbHLH304 PKLDRKTIERNRRIH-MKSLCFKLVSTIPSNDLKPTKDMLSQQDQLDLATTYIKRLKERIEK
AtbHLH012 NSGLNQDDPSDRRKE--NEKFSVLRTMVP--TVNE-VDKESI---LNNTIKYLQELEARVEE
GmbHLH4 ----MASTSREKKRESLEDTLQQLRDV----TNSSALNKASI---IVDASKYIEKLKQKVEG
GmbHLH5 -----MAASREKRRASLEETLQQLRDV----TNSTALNKASI---IVDASKYIEELKQKVEG
GmbHLH6 -----MDSRRRSKKAAMQRKLQQLRSV----TNSSAVNKASI---IVDATRYIEELKQKVDG
GmbHLH7 -----MDSRRRGKNASMQRKLQQLRSV----TNSSAVNKASI---IVDATRYIEELKQKVDG
GmbHLH8 ------MVSREQKRATLNEKLQLLRSI----TNSNALDKTSI---IIDASKYIEELKEKVER
GmbHLH160 -RPGESCRPRPRDRQLIQDRIKELRELVP--NGAK----CSIDSLLERTIKHMLFLQSITKH
GmbHLH162 -RPGESCRPRPRDRQLIQDRIKELRELVP--NGAK----CSIDSLLERAIKHLLFLQSITKH
GmbHLH161 -RPGESCRPRPRDRQLIQDRIKELRELVP--NGAK----CSIDSLLECTIKHMLFLQNITKH
AtbHLH156 LKPGENPRPRPKDRQMIQDRVKELREIIP--NGAK----CSIDALLERTIKHMLFLQNVSKH
GmbHLH163 -RAGESTRPRPKDRQQIQDCIKELRRLIP--NDGK----CSIDSLLDRTIRYMLFLQSVVKY
GmbHLH164 -RPGESTRPRPKDRQQIQDCIKELRRIIP--NDGK----CSIDSLLDRTIRYMLFLQSVLKY
AtbHLH142 DTGSGLSNEQSKKDK-IRTALKILESVVP---GAKGNEALLL---LDEAIDYLKLLKRDLIS
GmbHLH150 RSRQHSGSTRISDDQ-IIELVSKLRQLVPEIRNRR-SDKVSASKVLQETCNYIRGLHREVSD
GmbHLH151 RSRQHSGSTRISDDQ-IIELVSKLRQLVPEIRNRR-SDKVSASKVLQETCNYIRSLHREVSD
GmbHLH152 RSRQQSASTRISDDQ-IIDLVSKLRQLVPEIRDRR-SDKVSASKVLQETCNYIRSLHREVDD
GmbHLH154 RSRQTSSSRNITDDQ-INDLVSKLQQLLPEIRDRR-SDKVSASKVLQETCNYIRSLHREVDD
GmbHLH155 RSRQTSSSRNITDDQ-INDLVSKLQQLLPEIRDRR-SDKVSASKVLQETCNYIRSLHREVGD
GmbHLH156 RSSQSDVSTEITDAQ-ITDIISKLQQLIPELDARR-SDKVSASKVLQETCNYIKSLHREVDD
GmbHLH157 RSRQSGVSTEITDAQ-ITDLISKLQQLIPELRARR-SDKVSASKVLQETCNYIKSLHREVDD
GmbHLH158 RSRQSGASAEITDAQ-ITDLVSKLQQLIPELRARR-SDKVSSAKVLQETCNYIKNLHREVDD
GmbHLH159 RSRQSGASAEITDAQ-ITDLVSKLQQLIPELRARR-SDKVSAAKVLQETCNYIKNLHREVDD
AtbHLH135 RSRQSSGTSRISEDQ-INDLIIKLQQLLPELRDSRRSDKVSAARVLQDTCNYIRNLHREVDD
