# Supplementary figures and images for: A Classification of Basic Helix-Loop-Helix Transcription Factors of Soybean
Source: Hindawi journal article supplement (doi:10.1155/2015/603182), 2015-01-01

Additional File 4.

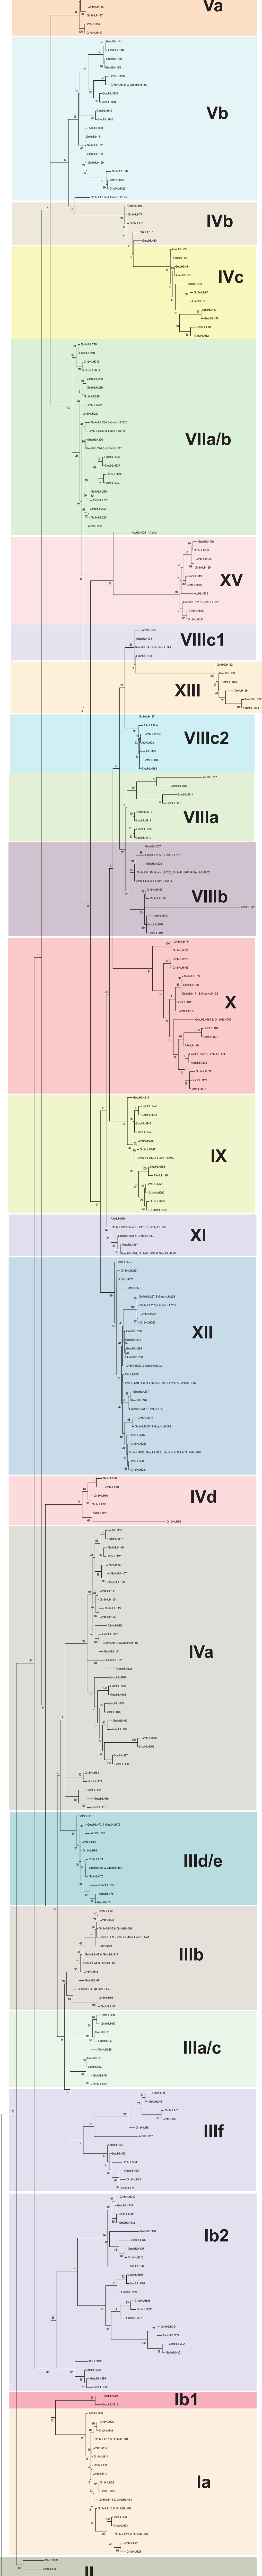

Supplement: f1 [file 603182.f1.zip]
